1 **Changes in seam number and location induce holes within microtubules**  
2 **assembled from porcine brain tubulin and in *Xenopus* egg cytoplasmic**  
3 **extracts**

4 Charlotte Guyomar<sup>1</sup>, Clément Bousquet<sup>1</sup>, Siou Ku<sup>1</sup>, John Heumann<sup>2</sup>, Gabriel Guilloux<sup>1</sup>,  
5 Natacha Gaillard<sup>3</sup>, Claire Heichette<sup>1</sup>, Laurence Duchesne<sup>1</sup>, Michel O. Steinmetz<sup>3,4</sup>, Romain  
6 Gibeaux<sup>1</sup>, Denis Chrétien<sup>1\*</sup>

7  
8 <sup>1</sup>Univ Rennes, CNRS, IGDR (Institut de Génétique et Développement de Rennes) - UMR  
9 6290, F-35000 Rennes, France.

10 <sup>2</sup>Department of Molecular, Cellular and Developmental Biology, University of Colorado,  
11 Boulder, CO 80309 USA.

12 <sup>3</sup>Laboratory of Biomolecular Research, Division of Biology and Chemistry, Paul Scherrer  
13 Institute, Villigen, Switzerland.

14 <sup>4</sup>University of Basel, Biozentrum, 4056 Basel, Switzerland

15 \*Corresponding author: [denis.chretien@univ-rennes1.fr](mailto:denis.chretien@univ-rennes1.fr)

16

17 **Abstract**

18 Microtubules are tubes of about 25 nm in diameter that are critically involved in a variety of  
19 cellular functions including motility, compartmentalization, and division. They are considered  
20 as pseudo-helical polymers whose constituent  $\alpha\beta$ -tubulin heterodimers share lateral  
21 homotypic interactions, except at one unique region called the seam. Here, we used a  
22 segmented sub-tomogram averaging strategy to reassess this paradigm and analyze the  
23 organization of the  $\alpha\beta$ -tubulin heterodimers in microtubules assembled from purified porcine  
24 brain tubulin in the presence of GTP and GMPCPP, and in *Xenopus* egg cytoplasmic extracts.  
25 We find that in all conditions, microtubules incorporate variable protofilament and/or tubulin

26 subunit helical-start numbers, as well as variable numbers of seams. Strikingly, the seam  
27 number and location vary along individual microtubules, generating holes of one to a few  
28 subunits in size within their lattices. Together, our results reveal that the formation of mixed  
29 and discontinuous microtubule lattices is an intrinsic property of tubulin that requires the  
30 formation of unique lateral interactions without longitudinal ones. They further suggest that  
31 microtubule assembly is tightly regulated in a cytoplasmic environment.

32

### 33 **Introduction**

34 The organization of the  $\alpha\beta$ -tubulin heterodimer within microtubules was originally inferred  
35 from the analysis of transmission electron microscopy images of negatively stained axonemal  
36 doublets (Amos & Klug, 1974). It was proposed that the tubulin subunits engage heterotypic  
37 lateral interactions ( $\alpha$ - $\beta$ ,  $\beta$ - $\alpha$ ) in the complete 13 protofilaments A-microtubule, and  
38 homotypic ones ( $\alpha$ - $\alpha$ ,  $\beta$ - $\beta$ ) in the incomplete 10 protofilaments B-microtubule, giving rise to  
39 the concept of the A and B lattices (Figure 1A-B). However, using kinesin-motor domains  
40 that bind uniquely to  $\beta$ -tubulin (Figure 1C), it was shown later that in both the A and B  
41 microtubules of the doublet, tubulin heterodimers engage homotypic interactions of the B  
42 type (Song & Mandelkow, 1995), which is also the case in microtubules assembled *in vitro*  
43 from purified tubulin (Crepeau et al., 1978; Song & Mandelkow, 1993). Noticeably, for  
44 geometrical reasons (McEwen & Edelstein, 1980; Wade & Chrétien, 1993), microtubules  
45 organized with 13 protofilaments and 3-start lateral helices should contain at least one 'seam'  
46 of the A-type (Figure 1B), which corresponds to our current view of microtubule lattice  
47 organization.

48

49 Multiple seams were first visualized by freeze-etching and rotary shadowing of microtubules  
50 assembled *in vitro* (Kikkawa et al., 1994). Using the same approach on cells treated with

51 detergent to remove the membrane and decorate the microtubules with kinesin-motor  
52 domains, the authors provided the first evidence of a preferred B-lattice type organization *in*  
53 *cellulo*, and could visualize unique seams in cytoplasmic microtubules. But due to the  
54 limitation of the method and the small number of microtubules observed, they did not exclude  
55 the possibility of several seams *in cellulo*. Since then, several studies have revealed the  
56 presence of multiple seams in microtubules assembled *in vitro*, noticeably in the presence of  
57 the stabilizing drug Taxol (Debs et al., 2020; des Georges et al., 2008; Howes et al., 2017;  
58 Sosa et al., 1997). The predominance of B-type lateral contacts *in cellulo* was confirmed by  
59 cryo-electron tomography after detergent removal of the membrane and decoration with  
60 kinesin-motor domains, but with no detailed statistics (McIntosh et al., 2009). Therefore, it  
61 turns out that our knowledge on the organization of  $\alpha\beta$ -tubulin heterodimers within  
62 microtubules assembled *in vitro* in the absence of drug and *in cellulo* remains limited.

63

64 To gain a deeper understanding of microtubule lattice organization *in vitro* and in a  
65 cytoplasmic environment, we analyzed microtubules assembled from purified porcine brain  
66 tubulin in the presence of GTP, the slowly hydrolysable analogue GMPCPP, and in *Xenopus*  
67 egg cytoplasmic extracts. Microtubules were decorated with kinesin-motor domains and their  
68 binding pattern was analyzed using cryo-electron tomography followed by sub-tomogram  
69 averaging (STA). To this end, we specifically developed a segmented sub-tomogram  
70 averaging (SSTA) strategy, which allowed us to investigate the structural heterogeneity of  
71 individual microtubules. We find that in all conditions the seam number and location vary  
72 within individual microtubules, leaving holes of one to a few subunits in size within their  
73 wall. Microtubules assembled in a cytoplasmic environment are more regular, suggesting a  
74 tightly regulated process. Moreover, the formation of discontinuous mixed AB-lattices  
75 implies that tubulin can engage unique lateral interactions without longitudinal ones at the

76 growing tip, a process that accounts for the formation of holes within their wall during  
77 polymerization.

78

## 79 **Results**

80 Microtubules were self-assembled *in vitro* from purified porcine brain tubulin in the presence  
81 of 1 mM GTP (Figure 2 - figure supplement 1A) and kinesin-motor domains were added at  
82 the polymerization plateau right before vitrification of the specimen grids into liquid ethane  
83 (Figure 2 - figure supplement 1B). Cryo-electron tomograms were acquired preferentially  
84 using a dual-axis strategy (Guesdon et al., 2013) so that all microtubules could be analyzed  
85 independently of their orientation with respect to the tilt axes (Figure 2 - figure supplement  
86 1C, Video 1). The low magnifications used, between 25 000 X and 29 000 X, allowed us to  
87 record long stretches of the microtubules, ~1 to 2  $\mu\text{m}$  in length, to optimize the sub-  
88 tomographic averaging strategy along individual fibers.

89

### 90 **The number and location of seams vary within individual microtubules assembled from** 91 **purified tubulin**

92 We first processed entire microtubules present in the tomograms using a sub-tomogram  
93 averaging approach that retrieves small sub-volumes of  $\sim 50 \text{ nm}^3$  in size at every kinesin-  
94 motor domain position (Zabeo et al., 2018) (i.e., every  $\sim 8 \text{ nm}$ ; Figure 2 - figure supplement  
95 2A). The resulting 3D volumes clearly revealed the protofilament number and the  
96 organization of the kinesin-motor domains around the microtubule lattice (Figure 2A, Video  
97 2), and hence the underlying organization of their constituent tubulin dimers (Figure 2B-C).  
98 In agreement with previous studies performed on Taxol-stabilized microtubules (Debs et al.,  
99 2020; des Georges et al., 2008; Howes et al., 2017; Kikkawa et al., 1994; Sosa et al., 1997),



100 we found that microtubules assembled *in vitro* from purified tubulin in the presence of GTP  
101 contained one to several A-lattice seams (Figure 3). However, we could frequently observe  
102 protofilaments with a much thinner appearance where the kinesin-motor domain periodicity  
103 was partly or completely lost (Figure 3A, Video 3). We hypothesized that the appearance of  
104 such aberrant protofilaments resulted from the averaging of regions containing kinesin-motor  
105 domain densities with regions falling in between. To explore this idea, we used SSTA to  
106 reconstruct short regions along individual microtubules (Figure 3B-C, Figure 3 - figure  
107 supplement 2B). Using this approach, we could identify regions where the seam number  
108 and/or location varied within individual microtubules. In the example shown in Figure 3B, the  
109 segment S1 contains 5 seams while S3 and S4 contain 3 seams. S2 still displays two aberrant  
110 protofilaments indicating that the change in seam number occurred in this region. To confirm  
111 this hypothesis, we extracted the corresponding region in the raw tomogram that was further  
112 filtered by thresholding intensities in Fourier space to increase the signal-to-noise ratio  
113 (Figure 4A). Comparison between the kinesin-motor domain patterns in the sub-tomogram  
114 averages of segments S1 to S3 with the filtered S2 region confirmed that this latter constitutes  
115 a transition zone where the seam number changes from 5 to 3. Line plots along the registered  
116 protofilaments (Figure 4B) shows that the kinesin-motor domain periodicity becomes out of  
117 phase after the transition in the aberrant protofilaments, implying an offset of at least one  
118 monomer (or an odd number) before and after the transition, and hence the presence of holes  
119 within the microtubule lattice (Figure 4C). Analysis of 24 microtubules taken on 4  
120 tomograms, representing 195 segments of ~160 nm length (i.e., 2664 lateral interactions),  
121 revealed an average lattice type transition frequency of  $3.7 \mu\text{m}^{-1}$  (Supplementary Table 1), but  
122 with a high heterogeneity. Some microtubules showed no or little lattice type transitions (e.g.,  
123 MT3 and MT4, Figure 3 - figure supplementary 3A; MT16, MT21 and MT23, Figure 3 -

124 figure supplementary 3B), while others were heavily dislocated, with a lattice type transition  
125 frequency as high as  $\sim 15 \mu\text{m}^{-1}$  (e.g., MT13 and MT14, Figure 3 - figure supplementary 3B).

126

### 127 **Lattice type transitions involve the formation of holes within microtubules**

128 Direct visualization of holes within microtubules self-assembled at high tubulin concentration  
129 (40  $\mu\text{M}$ ) in the presence of GTP was hampered by the high background generated by free  
130 tubulin in solution. In addition, the low magnification used to analyze long stretches of the  
131 microtubules was at the detriment of resolution. To improve the quality of the raw cryo-  
132 electron tomograms, we used GMPCPP to assemble microtubules at a lower tubulin  
133 concentration (10  $\mu\text{M}$ ), and acquired single-axis tilt series at a magnification of 50 000 X.  
134 SSTA was performed on kinesin-motor domains decorated GMPCPP-microtubules suitably  
135 oriented with respect to the tilt axis, in order to localize transition regions and to visualize  
136 corresponding holes in their lattice. The microtubule shown in Figure 5A transitioned from 1  
137 to 3 seams as demonstrated by SSTA. Visualization of the microtubule in the raw tomogram  
138 reveals a transition from a B- to an A-lattice organization in the 3 protofilaments located at its  
139 lower surface (Figure 3B), as assessed by the diffraction patterns of the corresponding  
140 regions, and after filtration of the equatorial and  $8 \text{ nm}^{-1}$  layer lines. Enlargement of the central  
141 region (Figure 3C) shows a hole of one subunit's size in the middle protofilament (2) that  
142 accounts for the change in lattice organization at this location. In addition, the first  
143 protofilament (1) displays a gap of one dimer's size, although we cannot exclude that this  
144 results from an absence of kinesin-motor domain. Analysis of 31 GMPCPP-microtubules  
145 taken on 6 tomograms using the same strategy as in the presence of GTP (Figure 5 - figure  
146 supplement 4) revealed a transition frequency of  $1.2 \mu\text{m}^{-1}$  (Supplementary Table 1), i.e.,  $\sim 3$   
147 fold lower than microtubules assembled in the presence of GTP. However, since we used  
148 different tubulin concentrations, i.e., 10  $\mu\text{M}$  and 40  $\mu\text{M}$  in the presence of GMPCPP and

149 GTP, respectively, we cannot exclude a concentration dependent effect on the lattice type  
150 transition frequency.

151

## 152 **Methodological artefacts limit the visualization of holes within microtubules in raw** 153 **cryo-electron tomograms**

154 During this study, we found strong limitations to the observation of holes within microtubules  
155 in raw tomograms. First, the transition regions had to be located at the top or bottom surface  
156 of the microtubule with respect to the electron beam, since edges were severely smoothed due  
157 to the lack of data at high angle that elongate densities in this direction (Figure 6A-B). This  
158 artefact is inherent to electron tomography, limiting the search of holes within microtubules in  
159 raw tomograms. A second severe artefact commonly encountered, especially in thin ice  
160 layers, was denaturation of kinesin heads at the air-water interface (Figure 6C-D). This  
161 artefact shows up as a diminution of the kinesin-motor domain density, whose periodical  
162 arrangement can only be recovered after SSTA (Figure 6D). This analysis clearly showed that  
163 SSTA remains compulsory to localize changes in lattice type organization within individual  
164 microtubules, and thus visualize the corresponding holes in regions suitably oriented with  
165 respect to the tilt axis and not in interaction with the air-water interfaces.

166

## 167 **Lattice type transitions occur in a cytoplasmic environment**

168 Next, we wondered whether the formation of holes was an intrinsic property of tubulin  
169 polymerization and if such microtubule lattice defects were also present in a cellular context.  
170 Decorating microtubules with kinesin-motor domains in cells remains challenging, since it  
171 involves removing of the cell membrane with detergents, adding kinesin-motor domains, and  
172 obtaining specimens thin enough to be analyzed by electron microscopy (Kikkawa et al.,

173 1994; McIntosh et al., 2009). To overcome these difficulties and allow the analysis of a large  
174 data set of cytoplasmic microtubules, we took advantage of the open cellular system  
175 constituted by metaphase-arrested *Xenopus* egg cytoplasmic extracts (Gibeaux & Heald,  
176 2019). Microtubule assembly was triggered using either DMSO (Sawin & Mitchison, 1994)  
177 or a constitutively active form of Ran (RanQ69L, (Carazo-Salas et al., 1999)) to control for  
178 possible effects of DMSO. Cryo-fluorescence microscopy was initially used to optimize the  
179 density of microtubule asters onto electron-microscope grids (Figure 7A). For structural  
180 analysis, kinesin-motor domains were added to fluorescent label-free cytoplasmic extracts  
181 right before vitrification (Figure 7 - figure supplement 1D), and specimens were imaged using  
182 dual-axis cryo-electron tomography (Figure 7B, Video 4) followed by SSTA.

183

184 The vast majority of the microtubule segments were organized according to 13  
185 protofilaments, three-start helices in a B-lattice configuration with one single seam (Figure 8 -  
186 figure supplement 5, Supplementary Table 2). Yet, lattice type transitions were observed in  
187 six cases over the 64 microtubules analyzed in the DMSO sample (Figure 8 - figure  
188 supplement 5, MT2, MT5, MT14, MT18, MT28, MT56). Similarly, 2 lattice type transitions  
189 were observed over 15 microtubules analyzed in the Ran sample (Figure 8 - figure  
190 supplement 6, MT4, MT10), showing that the presence of transitions was independent of the  
191 method used to trigger microtubule aster formation. The transition lattice type frequencies  
192 were  $\sim 0.1 \mu\text{m}^{-1}$  (Supplementary Table 1), i.e., at least one order of magnitude less than with  
193 microtubules assembled from purified tubulin in the presence of GMPCPP and GTP,  
194 respectively. Strikingly, these transitions systematically involved a lateral offset of the seam  
195 by one protofilament (Figure 8, Video 5). In addition, variations in protofilament and helix-  
196 start numbers were also observed such as 12\_2, 12\_3, 13\_4 and 14\_3 microtubule-lattice  
197 regions (Figure 9). Of note, the 12\_2 and 13\_4 microtubules showed a local dislocation in

198 between two protofilaments (Video 6), which is likely a response to the excessive  
199 protofilament skewing present in these microtubules (Chrétien & Fuller, 2000). The 12\_2  
200 microtubule contained two seams (Figure 9A), while the 13\_4 microtubules had no seam  
201 (Figure 9C), and hence were fully helical at the tubulin dimer level (MT7 and MT8, Figure 9 -  
202 figure supplement 5A). These observations demonstrate that changes in protofilament and/or  
203 helix-start numbers, as well as multiple seams and transitions in lattice types, occur within  
204 individual microtubules assembled in a cytoplasmic context.

205

## 206 **Discussion**

207 Here we used a segmented sub-tomogram strategy to reveal changes in lattice types within  
208 individual microtubules assembled from purified tubulin or in a cytoplasmic context, and  
209 hence holes within their lattice. Ideally, cryo-electron tomography should reveal holes in the  
210 absence of averaging. Yet, we found severe limitations that are independent of the instrument  
211 used, but that are linked to the methodology. First, missing data at high angle, whether they  
212 are taken by single- or dual-axis cryo-electron tomography, blur densities on the edges of  
213 microtubules with respect to the tilt axis (Guesdon et al., 2013). Second, we found that the  
214 interaction of the microtubules with the air-water interface diminishes the kinesin-motor  
215 domain densities, likely as a consequence of denaturation (D’Imprima et al., 2019; Klebl et  
216 al., 2022). Third, the lattice type transition frequency remains low with respect to the number  
217 of tubulin heterodimers within microtubules. It is 3.7 and 1.2 transitions every  $\mu\text{m}$  for  
218 microtubules assembled in the presence of GTP, and GMPCPP, respectively, and  $\sim 1$  every  
219  $\sim 10 \mu\text{m}$  for cytoplasmic extract microtubules. Considering that  $1 \mu\text{m}$  of a 13 protofilament  
220 microtubule contains  $\sim 16250$  dimers, this translates to one lattice type transition every 16250  
221 dimers, which hinders the localization of holes in raw data. Conversely, the original SSTA  
222 approach we used allows localization of lattice type transitions along individual microtubules

223 independently of their orientation with respect to the tilt axis, and at surfaces that interact with  
224 the air-water interface. While missing data at high angle are inherent to the method of electron  
225 tomography, means to limit denaturation of proteins at the air-water interface must be found.  
226 This is critical for cryo-electron tomography, but also for single particle analysis methods  
227 where this artefact is a limiting factor to obtain high-resolution data (J. Chen et al., 2019; S.  
228 Chen et al., 2022; D'Imprima et al., 2019; Klebl et al., 2022; Li et al., 2021).

229

230 Changes in lattice types along individual microtubules could result from an imperfect  
231 annealing of shorter microtubules, a process known to occur *in vitro* (Rothwell et al., 1986).  
232 Yet, the lattice type transition frequency observed with purified tubulin would necessitate  
233 annealing of very short segments, sometime a few tens to hundreds of nm in length. The  
234 average lattice type transition frequency observed in cytoplasmic extracts could be compatible  
235 with annealing of microtubules a few  $\mu\text{m}$  in length. However, the fact that these transitions  
236 involved systematically a lateral seam offset of only one protofilament suggests a firm  
237 regulatory mechanism. Hence, a more plausible explanation is that these lattice discontinuities  
238 are formed during microtubule assembly (Figure 10, Video 7). At present, classical models of  
239 microtubule elongation hypothesize that tubulin engages either uniquely longitudinal  
240 interactions (Figure 10A, step 1), or both longitudinal and lateral interactions with the  
241 growing tip of microtubules (Figure 10B, step 2). A purely longitudinal elongation process  
242 (McIntosh et al., 2018) can hardly explain how microtubules can vary in terms of  
243 protofilament and/or helix start numbers as well as in lattice types, and thus how holes can  
244 arise during assembly. Conversely, to account for the presence of holes of one to a few  
245 subunits in size, it is sufficient to consider that tubulin can engage lateral interactions without  
246 longitudinal ones (Figure 10A, step 3). Gaps of an odd number of tubulin subunits will induce  
247 lattice type transitions (Figure 10A, steps 4-5), while those of an even number will induce no

248 changes (Figure 10B). Hence, since both types of events are likely to occur, we may  
249 underestimate the presence of holes within microtubules. In addition, a finer sampling of the  
250 microtubule lattice with shorter segments could also reveal a higher hole frequency.  
251 Formation of lateral contacts without longitudinal ones at the seam region can also explain  
252 how the seam can vary in position by one protofilament (Figure 10C), since this only requires  
253 that a tubulin dimer engages homotypic lateral interactions at the seam region (Figure 10C,  
254 step 2). This event will also leave a gap of an odd number of subunits within the microtubule  
255 lattice (Figure 10C, steps 3-4).

256

257 Our current view of microtubules organized according to a perfect pseudo-helical B-lattice  
258 interrupted by a single A-lattice seam must be reconsidered. This is definitely the case for  
259 microtubules assembled from purified tubulin and has profound consequences for the  
260 interpretation of biochemical, biophysical, and structural results. For instance, 3D  
261 reconstruction studies will have to take into account the heterogeneity of the microtubule  
262 lattice to reach higher resolution (Debs et al., 2020). The lattice organization of cytoplasmic  
263 extract microtubules is more in agreement with the B-lattice, single seam model. However,  
264 exceptions are also observed such as changes in protofilament and/or helix start numbers, as  
265 well as in the location of seams within individual microtubules. Therefore, our results suggest  
266 that the formation of heterogeneous microtubule lattices is an intrinsic property of tubulin  
267 polymerization, which is firmly regulated in cells. One key regulatory factor could be the  $\gamma$ -  
268 tubulin ring complex ( $\gamma$ TuRC), which imposes the 13 protofilament organization to a nascent  
269 microtubule (Böhler et al., 2021). But how this structure is preserved during microtubule  
270 elongation remains unclear, especially if one considers a two-dimensional assembly process  
271 where the lattice can vary in terms of protofilament number, helix-start number, or lattice type  
272 during elongation. Proteins of the end-binding (EB) family are other good candidates that

273 could play a key role in regulating microtubule structure during assembly in cells. They  
274 interact with the tip of growing microtubules and bind in between protofilaments that are  
275 organized according to a B-lattice (Maurer et al., 2012); they thus may favor the formation of  
276 homotypic lateral interactions during assembly. In addition, EBs have been shown to induce  
277 the formation of 13 protofilaments, three-start helix microtubules (Manka & Moores, 2018;  
278 Vitre et al., 2008), which could also be forced to adopt a preferential B-lattice type  
279 organization. Conversely, microtubule polymerases like XMAP215, which act at growing  
280 microtubule ends (Brouhard et al., 2008), may favor lattice heterogeneities (Farmer et al.,  
281 2021). It remains to be determined whether the concerted action of different microtubule  
282 growing-end binding proteins regulate microtubule structure and dynamics in cells  
283 (Akhmanova & Steinmetz, 2008).

284

### 285 **Ideas and speculation**

286 Microtubules alternate stochastically between growing and shrinking states, an unusual  
287 behavior termed dynamic instability that was discovered some 38 years ago (Mitchison &  
288 Kirschner, 1984). Although it is exquisitely regulated in cells by a myriad of microtubule  
289 associated proteins (Cleary & Hancock, 2021), it is also an intrinsic property of microtubules  
290 assembled from purified tubulin, demonstrating that it is intimately tied to tubulin assembly  
291 properties (Brouhard, 2015).

292

293 The  $\alpha\beta$ -tubulin heterodimer binds two molecules of GTP, one located between the  $\alpha$  and  $\beta$   
294 monomers at the non-exchangeable N-site, and one on the  $\beta$ -subunit at the longitudinal  
295 interface between heterodimers at the E-site that becomes hydrolyzed to GDP during  
296 assembly. GTP-hydrolysis destabilizes the microtubule lattice, likely weakening tubulin  
297 lateral interactions by a mechanism that remains unclear (Zhang et al., 2015). A slight delay



298 between polymerization and GTP-hydrolysis would allow the formation of a protective GTP-  
299 cap at growing microtubule ends (Pantaloni & Carlier, 1986). The current model(s) speculate  
300 that stochastic loss of this GTP-cap induces depolymerization events known as catastrophes  
301 (Mitchison & Kirschner, 1984). However, the molecular mechanisms that lead to  
302 disappearance of the GTP-cap remain unknown. The origin of repolymerization events,  
303 termed rescues, is also unclear, but may involve tubulin molecules that have not hydrolyzed  
304 their GTP and that remain trapped inside the microtubule lattice (Dimitrov et al., 2008).  
305 Noteworthy, the vast majority of theoretical models that have been designed so far to explain  
306 microtubule dynamic instability rely on a continuous lattice composed of B-type lattice  
307 contacts interrupted by a single seam of the A-type (Bowne-Anderson et al., 2013, 2015). Yet,  
308 exceptions to this rule have been documented over the years, essentially in microtubules  
309 assembled *in vitro* from purified tubulin. It is known that microtubules can accommodate  
310 different protofilament and helix-start numbers (Chaaban & Brouhard, 2017; Chrétien &  
311 Wade, 1991). These numbers can vary within individual microtubules (Chrétien et al., 1992),  
312 necessarily leaving holes inside their lattice (Schaedel et al., 2019; Théry & Blanchoin, 2021).  
313 Microtubules can also adopt configurations with a high protofilament skew that must be  
314 compensated by a relaxation step whose detailed mechanism remains to be described  
315 (Chrétien & Fuller, 2000). Microtubules with different numbers of seams have been described  
316 (Debs et al., 2020; des Georges et al., 2008; Howes et al., 2017; Kikkawa et al., 1994; Sosa et  
317 al., 1997), although it was not considered that both the seam number and location could vary  
318 within individual microtubules. Therefore, these previous studies and the present one indicate  
319 that the microtubule lattice is highly labile, with the ability to form different kinds of  
320 structural defects (Hunyadi et al., 2005; Rai et al., 2021).  
321

322 The formation of lattice defects during microtubule polymerization must impose energetical  
323 penalties at the growing microtubule end, potentially destabilizing the protective GTP-cap if  
324 present, and hence be at the origin of catastrophes. Likewise, holes must let patches of  
325 unhydrolyzed GTP-tubulin molecules within microtubules, potentially at the origin of  
326 rescues. Hence, we propose that microtubule dynamic instability is not only driven by the  
327 nucleotide state of tubulin, but also by the intrinsic structural instability of the microtubule  
328 lattice. MAPs such as EBs and XMAP215 may exploit this structural instability to finely tune  
329 microtubule dynamics in cells.

330

## 331 **Materials and Methods**

### 332 **Protein purification**

333 Tubulin was isolated from porcine brain by two cycles of assembly disassembly (Castoldi &  
334 Popov, 2003), followed by a final cycle in the absence of free GTP (Ashford & Hyman,  
335 2006). Tubulin was obtained in BRB80 (80 mM K-Pipes, 1 mM EGTA, 1 mM MgCl<sub>2</sub>, pH 6.8  
336 with KOH) and stored at -80 °C before use.

337

338 The cDNA fragment encoding for the human Kif5B motor domain (residues 1 to 349) was  
339 cloned into the pET based bacterial vector PSTCm1 (Olieric et al., 2010). The protein was  
340 expressed in Rosetta2 *E. coli* cells. Cells were grown at 37 °C in LB media supplemented  
341 with 50 µg/ml kanamycin and 30 µg/ml chloramphenicol to an OD<sub>600</sub> of 0.4 to 0.6.  
342 Temperature was reduced to 20 °C, the protein production was induced 20 min later with 0.5  
343 mM IPTG (isopropyl-1-thio-β-galactopyranoside), and incubation was continued overnight  
344 under agitation. The cells were harvested by centrifugation for 15 min at 4 000 g and the cell  
345 pellets were resuspended in lysis buffer (50 mM HEPES, pH 8.0, supplemented with 10 mM  
346 imidazole, 10 % glycerol, 0.1 mM ADP, 2 mM beta-mercaptoethanol, and one cComplete

347 EDTA free proteases inhibitor cocktail tablet per 50 mL buffer). The cells were lysed on ice  
348 per ultrasonication and lysate clearing was performed by centrifugation, 30 min at 24 000 g.  
349 The resultant supernatant was filtered using a 0.45 µm filter and the protein was subsequently  
350 purified by IMAC on a 5 ml HP HisTrap column (GE Healthcare) according to  
351 manufacturer's information. The eluted protein from this affinity step was concentrated and  
352 further purified by gel filtration on a HiLoad® 16/600 Superdex® 200 pg column (GE  
353 Healthcare) equilibrated in 20 mM TrisHCl, pH 7.5, supplemented with 150 mM NaCl, 0.1  
354 mM ADP, and 2 mM DTT. The homogeneity of the recombinant Kif5B motor domain was  
355 assessed by SDS-PAGE. Fractions were concentrated, aliquoted, flash frozen into liquid  
356 nitrogen, and stored at -80 °C.

357

### 358 **Animals**

359 All animal experimentation in this study was performed according to our animal use protocol  
360 APAFiS #26858-2020072110205978 approved by the Animal Use Ethic Committee (#7,  
361 Rennes, France) and the French Ministry of Higher Education, Research and Innovation.  
362 Mature *Xenopus laevis* female frogs were obtained from the CRB Xénope (Rennes, France)  
363 and ovulated with no harm to the animals with at least a 6-month rest interval between  
364 ovulations.

365

### 366 ***Xenopus* egg cytoplasmic extracts**

367 Cytostatic factor-arrested (CSF) egg extracts were prepared from freshly laid eggs of *Xenopus*  
368 *laevis* as previously described (Good & Heald, 2018; Murray, 1991). Briefly, eggs arrested in  
369 metaphase of meiosis II were collected, dejellied and fractionated by centrifugation. The  
370 cytoplasmic layer was isolated, supplemented with 10 mg/ml each of the protease inhibitors  
371 leupeptin, pepstatin and chymostatin (LPC), 20 mM cytochalasin B, and a creatine phosphate

372 and ATP energy regeneration mix. Vitrification of the samples for cryo-electron microscopy  
373 was performed the same day as the egg extract preparation.

374

### 375 **Cryo-fluorescence microscopy**

376 To determine the optimal density of microtubule structures assembled from *Xenopus* egg  
377 cytoplasmic extracts cryo-fixed on electron microscopy grids suitable for cryo-electron  
378 tomography acquisitions, we used cryo-fluorescence microscopy. Egg extracts were  
379 supplemented with 40 ng/ $\mu$ g rhodamine-tubulin before microtubule assembly was conducted  
380 by addition of 5% DMSO and incubation at 23 °C, for 30 to 45 min. Reactions were then  
381 extemporaneously diluted 1:10, 1:50 or 1:100 in 1X BRB80 buffer for vitrification on an  
382 electron microscopy grid. Frozen grids were imaged within a Linkam CMS196M cryo-  
383 correlative microscopy stage mounted on an Olympus BX51 microscope equipped with a  
384 Lumencor SOLA SE U-nIR light source, UPLFLN10X/0.30 and LMPLFLN50X/0.50  
385 objectives, and a Photometrics Prime-BSI sCMOS Back Illuminated camera. Images were  
386 acquired using the  $\mu$ Manager acquisition software v1.4 (Edelstein et al., 2014).

387

### 388 **Cryo-electron tomography**

389 Microtubules were assembled from purified porcine brain tubulin at 40  $\mu$ M in BRB80, 1 mM  
390 GTP, or at 10  $\mu$ M in BRB80, 0.1 mM GMPCPP, for about 1 h. Kif5B was diluted at a final  
391 concentration of 2.5 mg/ml in BRB80, 0.1 mM ATP, 1 mM GTP and 60 nM mix-matrix  
392 capped gold nanoparticles (Duchesne et al., 2008; Guesdon et al., 2016) and pre-warmed at 35  
393 °C. First, 3  $\mu$ l of the microtubule sample was deposited at the surface of a glow-discharged  
394 holey carbon grid (Quantifoil R2/2, Cu200) in the temperature (35 °C) and humidity-  
395 controlled atmosphere (~95 %) of an automatic plunge-freezer (EM-GP, Leica). Then, 3  $\mu$ l of  
396 the pre-warmed kinesin motor domain suspension was added to the grid onto the sample,

397 incubated for 30 s, and blotted manually. An additional 3  $\mu$ l of the pre-warmed kinesin motor  
398 domain suspension was added to the grid, blotted with the EMGP for 2 s using Whatman  
399 grade 1 filter paper and plunged into liquid ethane.

400

401 Microtubule aster assembly was induced in *Xenopus* egg cytoplasmic extracts by adding 5%  
402 DMSO or 15  $\mu$ M of the GTPase deficient Ran mutant RanQ69L purified as previously  
403 described (Helmke & Heald, 2014), and incubating at 23 °C for 30 to 45 min. Kif5B was  
404 diluted at a final concentration of 2.5 mg/ml in BRB80, 0.1 mM ATP, 1 mM GTP and 60 nM  
405 mix-matrix capped gold nanoparticles (Duchesne et al., 2008; Guesdon et al., 2016), and pre-  
406 warmed at 23 °C. A 3  $\mu$ l volume of the Kif5B suspension was first deposited at the surface of  
407 a glow-discharged holey carbon grid (Quantifoil R2/2, Cu200) in the temperature (23 °C) and  
408 humidity-controlled atmosphere (~95 %) of the EM-GP, on the side of the grid to be blotted.  
409 Right away, one volume of the extract sample was diluted 50 X in the pre-warmed Kif5B  
410 suspension, and 3  $\mu$ l of this mix was deposited on the other side of the grid. The grid was  
411 blotted from the opposite side of the sample with the EM-GP for 4 s using Whatman grade  
412 filter 4 and plunged into liquid ethane.

413

414 For dual-axis cryo-electron tomography, specimen grids were transferred to a rotating cryo-  
415 holder (model CT3500TR, Gatan), and observed using a 200 kV electron microscope  
416 equipped with a LaB<sub>6</sub> cathode (Tecnai G<sup>2</sup> T20 Sphera, FEI). Images of microtubules  
417 assembled from purified tubulin were recorded on a 4k x 4K CCD camera (USC4000, Gatan)  
418 in binning mode 2 and at a nominal magnification of 29 000 X, providing a final pixel size of  
419 0.79 nm. Images of microtubules assembled in *Xenopus* egg extracts were recorded on a 4K x  
420 4k CMOS camera (XF416, TVIPS) in binning mode 2 and at a nominal magnification of 25  
421 000 X and 29 000 X, providing final pixel sizes of 0.87 nm and 0.74 nm, respectively. Pixel

422 sizes were calibrated using TMV as a standard (Guesdon et al., 2016). Dual-axis cryo-electron  
423 tomography data were acquired as previously described (Guesdon et al., 2013). Briefly, a first  
424 tilt series of ~40 images was taken in an angular range of  $\sim\pm 60^\circ$  starting from  $0^\circ$  and using a  
425 Saxton scheme. The specimen was turned by a  $\sim 90^\circ$  in plane rotation at low magnification  
426 and a second tilt series was taken on the same area using parameters identical to the first  
427 series. Tomograms were reconstructed using the Etomo graphical user interface of the IMOD  
428 program (Kremer et al., 1996; Mastronarde, 1997). Tilt series were typically filtered after  
429 alignment using a low pass filter at 0.15 cycles/pixels and a sigma of 0.05. Tomograms were  
430 reconstructed in 3D using the SIRT-like filter of Etomo with 15 equivalent iterations. Dual-  
431 axis cryo-electron tomograms were converted to bytes before further processing.

432

433 For single-axis cryo-electron tomography, specimen grids were transferred to a dual grid  
434 cryo-transfer holder model 205 (Simple Origin). Data were acquired on a 4K x 4k CMOS  
435 camera (XF416, TVIPS) in binning mode 1 and at a nominal magnification of 50 000 X,  
436 providing a final pixel size of 0.21 nm. Typically, 40 images were taken in an angular range  
437 of  $\sim\pm 60^\circ$  starting from  $0^\circ$ , or using a symmetric electron dose scheme (Hagen et al., 2017). To  
438 localize holes within microtubules by SSTA, tomograms were subsequently binned by 4 to  
439 provide a final pixel size of 0.83 nm.

440

#### 441 **Sub-tomogram averaging**

442 Sub-tomogram averages were calculated using the procedure described online  
443 ([https://bio3d.colorado.edu/RML\\_2017/2017\\_IMOD\\_PEET\\_Workshop/Lab\\_Instructions/L8](https://bio3d.colorado.edu/RML_2017/2017_IMOD_PEET_Workshop/Lab_Instructions/L8_Microtubules.pdf)  
444 [Microtubules.pdf](#)). Briefly, a first model was created by following individual protofilaments  
445 in cross section using the slicer tool in IMOD. Usually, ~50 electronic slices were averaged to  
446 reinforce the contrast. A second model was next extrapolated from the first one to mark the

447 microtubule center at the same point positions. Then, a third model was calculated from the  
448 previous ones with points spaced every ~8 nm, and a motive list containing Euler angles of  
449 each sub-volume with respect to the chosen reference was created. Sub-volumes of ~40  
450 pixels<sup>3</sup> were extracted at each point position using the graphical user interface of the PEET  
451 program (Nicastro et al., 2006). Registration of the microtubule segments was performed by  
452 cross-correlation, limiting rotational angular searches around the microtubule axis to about  
453 half the angular separation between protofilaments. Other angles were set to take into account  
454 variations of microtubule curvature in the X, Y and Z directions. Segmented sub-tomogram  
455 averaging was performed using a new routine (splitIntoNsegments) implemented into the  
456 PEET program version 1.14.1. This routine splits the initial model and motive list into  $N$   
457 segments of equal size and creates sub-directories for each segment. Sub-tomogram averages  
458 are calculated for each segment, using the original sub-tomogram average parameters of the  
459 whole microtubule as a template.

460

#### 461 **Image analysis and model building**

462 Sub-tomogram averages were inspected using the isosurface panel of IMOD. Four scattered  
463 models were created. Model 1 was used to mark the kinesin motor domain densities (yellow  
464 spheres), model 2 to mark the absence of densities (cyan spheres), model 3 aberrant densities  
465 (red spheres), and model 4 the microtubule center. Spheres from model 1 to 3 were placed  
466 along the  $S$ -start lateral helices. The 4<sup>th</sup> last model was enlarged to cross the kinesin motor  
467 domain densities in order to place the other spheres at a same radius. The number of  
468 protofilaments and the different lateral contacts (A, B and undefined lateral contacts) were  
469 retrieved from these models.

470

471

## 472 **Acknowledgments**

473 Cryo-electron microscopy data were acquired on the Microscopy Rennes imaging center  
474 platform (Biosit, Rennes, France), member of the national infrastructure France-  
475 BioImaging (FBI) supported by the French National Research Agency (ANR-10-INBS-04).  
476 *Xenopus laevis* eggs were obtained from the Centre de Ressources Biologique Xénopes,  
477 Université de Rennes 1, Rennes, France. Porcine brains were kindly provided by Y. Drillet,  
478 Cooperl Arc Atlantique, Lamballe France. Tobacco Mosaic Virus was kindly provided by T.  
479 Candresse, UMR 13332 Biologie du Fruit et Pathologie, INRAE and University of Bordeaux,  
480 Villenave d'Ornon, France. Video 7 was designed by A. Kawska, Illuscienta, Paris, France.  
481 This work was supported by two French National Research Agency grants (ANR-16-CE11-  
482 0017-01 to D.C. and M.O.S., and ANR-18-CE13-0001-01 to D.C.), a Swiss National Science  
483 Foundation grant (310030\_192566 to M.O.S.) and a Human Frontier Science Program grant  
484 (CDA00019/2019-C to R.G.).

485

## 486 **References**

487 Akhmanova, A., & Steinmetz, M. O. (2008). Tracking the ends: A dynamic protein network  
488 controls the fate of microtubule tips. *Nature Reviews. Molecular Cell Biology*, 9(4), 309–322.  
489 <https://doi.org/10.1038/nrm2369>

490 Amos, L. A., & Klug, A. (1974). Arrangement of subunits in flagellar microtubules. *Journal*  
491 *of Cell Science*, 14(3), 523–549 <https://doi.org/10.1242/jcs.14.3.523>

492 Ashford, A. J., & Hyman, A. A. (2006). Chapter 22—Preparation of Tubulin from Porcine  
493 Brain. In J. E. Celis (Éd.), *Cell Biology (Third Edition)* (p. 155–160). Academic Press.  
494 <https://doi.org/10.1016/B978-012164730-8/50094-0>

495 Böhler, A., Vermeulen, B. J. A., Würtz, M., Zupa, E., Pfeffer, S., & Schiebel, E. (2021). The  
496 gamma-tubulin ring complex: Deciphering the molecular organization and assembly



497 mechanism of a major vertebrate microtubule nucleator. *BioEssays*, 43(8), 2100114.  
498 <https://doi.org/10.1002/bies.202100114>

499 Bowne-Anderson, H., Hibbel, A., & Howard, J. (2015). Regulation of Microtubule Growth  
500 and Catastrophe: Unifying Theory and Experiment. *Trends in cell biology*, 25(12),  
501 769–779. <https://doi.org/10.1016/j.tcb.2015.08.009>

502 Bowne-Anderson, H., Zanic, M., Kauer, M., & Howard, J. (2013). Microtubule dynamic  
503 instability: A new model with coupled GTP hydrolysis and multistep catastrophe.  
504 *BioEssays: News and Reviews in Molecular, Cellular and Developmental Biology*, 35(5),  
505 452–461. <https://doi.org/10.1002/bies.201200131>

506 Brouhard, G. J. (2015). Dynamic instability 30 years later: Complexities in microtubule  
507 growth and catastrophe. *Molecular Biology of the Cell*, 26(7), 1207–1210.  
508 <https://doi.org/10.1091/mbc.E13-10-0594>

509 Brouhard, G. J., Stear, J. H., Noetzel, T. L., Al-Bassam, J., Kinoshita, K., Harrison, S. C.,  
510 Howard, J., & Hyman, A. A. (2008). XMAP215 is a processive microtubule polymerase.  
511 *Cell*, 132(1), 79–88. <https://doi.org/10.1016/j.cell.2007.11.043>

512 Carazo-Salas, R. E., Guarguaglini, G., Gruss, O. J., Segref, A., Karsenti, E., & Mattaj, I. W.  
513 (1999). Generation of GTP-bound Ran by RCC1 is required for chromatin-induced mitotic  
514 spindle formation. *Nature*, 400(6740), 178–181. <https://doi.org/10.1038/22133>

515 Castoldi, M., & Popov, A. V. (2003). Purification of brain tubulin through two cycles of  
516 polymerization–depolymerization in a high-molarity buffer. *Protein Expression and*  
517 *Purification*, 32(1), 83–88. [https://doi.org/10.1016/S1046-5928\(03\)00218-3](https://doi.org/10.1016/S1046-5928(03)00218-3)

518 Chaaban, S., & Brouhard, G. J. (2017). A microtubule bestiary: Structural diversity in  
519 tubulin polymers. *Molecular Biology of the Cell*, 28(22), 2924–2931.  
520 <https://doi.org/10.1091/mbc.E16-05-0271>

521 Chen, J., Noble, A. J., Kang, J. Y., & Darst, S. A. (2019). Eliminating effects of particle

522 adsorption to the air/water interface in single-particle cryo-electron microscopy: Bacterial  
523 RNA polymerase and CHAPSO. *Journal of Structural Biology: X*, *1*, 100005.  
524 <https://doi.org/10.1016/j.yjsbx.2019.100005>

525 Chen, S., Li, J., Vinothkumar, K. R., & Henderson, R. (2022). Interaction of human  
526 erythrocyte catalase with air–water interface in cryoEM. *Microscopy*, *71*(Supplement\_1),  
527 i51–i59. <https://doi.org/10.1093/jmicro/dfab037>

528 Chrétien, D., & Fuller, S. D. (2000). Microtubules switch occasionally into unfavorable  
529 configurations during elongation. *Journal of Molecular Biology*, *298*(4), 663–676.  
530 <https://doi.org/10.1006/jmbi.2000.3696>

531 Chrétien, D., Metoz, F., Verde, F., Karsenti, E., & Wade, R. (1992). Lattice defects in  
532 microtubules: Protofilament numbers vary within individual microtubules. *Journal of Cell*  
533 *Biology*, *117*(5), 1031–1040. <https://doi.org/10.1083/jcb.117.5.1031>

534 Chrétien, D., & Wade, R. H. (1991). New data on the microtubule surface lattice. *Biology of*  
535 *the Cell*, *71*(1–2), 161–174. [https://doi.org/10.1016/0248-4900\(91\)90062-r](https://doi.org/10.1016/0248-4900(91)90062-r)

536 Cleary, J. M., & Hancock, W. O. (2021). Molecular mechanisms underlying microtubule  
537 growth dynamics. *Current Biology: CB*, *31*(10), R560–R573.  
538 <https://doi.org/10.1016/j.cub.2021.02.035>

539 Crepeau, R. H., McEwen, B., & Edelstein, S. J. (1978). Differences in alpha and beta  
540 polypeptide chains of tubulin resolved by electron microscopy with image reconstruction.  
541 *Proceedings of the National Academy of Sciences of the United States of America*, *75*(10),  
542 5006–5010. <https://doi.org/10.1073/pnas.75.10.5006>

543 Debs, G. E., Cha, M., Liu, X., Huehn, A. R., & Sindelar, C. V. (2020). Dynamic and  
544 asymmetric fluctuations in the microtubule wall captured by high-resolution cryoelectron  
545 microscopy. *Proceedings of the National Academy of Sciences of the United States of*  
546 *America*, *117*(29), 16976–16984. <https://doi.org/10.1073/pnas.2001546117>

547 des Georges, A., Katsuki, M., Drummond, D. R., Osei, M., Cross, R. A., & Amos, L. A.  
548 (2008). Mal3, the *Schizosaccharomyces pombe* homolog of EB1, changes the microtubule  
549 lattice. *Nature Structural & Molecular Biology*, *15*(10), 1102–1108.  
550 <https://doi.org/10.1038/nsmb.1482>

551 Dimitrov, A., Quesnoit, M., Moutel, S., Cantaloube, I., Poüs, C., & Perez, F. (2008).  
552 Detection of GTP-tubulin conformation in vivo reveals a role for GTP remnants in  
553 microtubule rescues. *Science (New York, N.Y.)*, *322*(5906), 1353–1356.  
554 <https://doi.org/10.1126/science.1165401>

555 D’Imprima, E., Floris, D., Joppe, M., Sánchez, R., Grininger, M., & Kühlbrandt, W. (2019).  
556 Protein denaturation at the air-water interface and how to prevent it. *eLife*, *8*, e42747.  
557 <https://doi.org/10.7554/eLife.42747>

558 Duchesne, L., Gentili, D., Comes-Franchini, M., & Fernig, D. G. (2008). Robust Ligand  
559 Shells for Biological Applications of Gold Nanoparticles. *Langmuir*, *24*(23), 13572–13580.  
560 <https://doi.org/10.1021/la802876u>

561 Edelstein, A. D., Tsuchida, M. A., Amodaj, N., Pinkard, H., Vale, R. D., & Stuurman, N.  
562 (2014). Advanced methods of microscope control using  $\mu$ Manager software. *Journal of*  
563 *Biological Methods*, *1*(2), e10–e10. <https://doi.org/10.14440/jbm.2014.36>

564 Farmer, V., Arpağ, G., Hall, S. L., & Zanic, M. (2021). XMAP215 promotes microtubule  
565 catastrophe by disrupting the growing microtubule end. *Journal of Cell Biology*, *220*(10),  
566 e202012144. <https://doi.org/10.1083/jcb.202012144>

567 Gibeaux, R., & Heald, R. (2019). The Use of Cell-Free *Xenopus* Extracts to Investigate  
568 Cytoplasmic Events. *Cold Spring Harbor Protocols*, *2019*(6).  
569 <https://doi.org/10.1101/pdb.top097048>

570 Good, M. C., & Heald, R. (2018). Preparation of Cellular Extracts from *Xenopus* Eggs and  
571 Embryos. *Cold Spring Harbor Protocols*, *2018*(6), pdb.prot097055.

- 572 <https://doi.org/10.1101/pdb.prot097055>
- 573 Guesdon, A., Bazile, F., Buey, R. M., Mohan, R., Monier, S., García, R. R., Angevin, M.,  
574 Heichette, C., Wieneke, R., Tampé, R., Duchesne, L., Akhmanova, A., Steinmetz, M. O., &  
575 Chrétien, D. (2016). EB1 interacts with outwardly curved and straight regions of the  
576 microtubule lattice. *Nature Cell Biology*, *18*(10), 1102–1108.  
577 <https://doi.org/10.1038/ncb3412>
- 578 Guesdon, A., Blestel, S., Kervrann, C., & Chrétien, D. (2013). Single versus dual-axis cryo-  
579 electron tomography of microtubules assembled in vitro: Limits and perspectives. *Journal*  
580 *of Structural Biology*, *181*(2), 169–178. <https://doi.org/10.1016/j.jsb.2012.11.004>
- 581 Hagen, W. J. H., Wan, W., & Briggs, J. A. G. (2017). Implementation of a cryo-electron  
582 tomography tilt-scheme optimized for high resolution subtomogram averaging. *Journal of*  
583 *Structural Biology*, *197*(2), 191–198. <https://doi.org/10.1016/j.jsb.2016.06.007>
- 584 Helmke, K. J., & Heald, R. (2014). TPX2 levels modulate meiotic spindle size and  
585 architecture in *Xenopus* egg extracts. *The Journal of Cell Biology*, *206*(3), 385–393.  
586 <https://doi.org/10.1083/jcb.201401014>
- 587 Howes, S. C., Geyer, E. A., LaFrance, B., Zhang, R., Kellogg, E. H., Westermann, S., Rice,  
588 L. M., & Nogales, E. (2017). Structural differences between yeast and mammalian  
589 microtubules revealed by cryo-EM. *The Journal of Cell Biology*, *216*(9), 2669–2677.  
590 <https://doi.org/10.1083/jcb.201612195>
- 591 Hunyadi, V., Chrétien, D., & Jánosi, I. M. (2005). Mechanical stress induced mechanism of  
592 microtubule catastrophes. *Journal of Molecular Biology*, *348*(4), 927–938.  
593 <https://doi.org/10.1016/j.jmb.2005.03.019>
- 594 Kikkawa, M., Ishikawa, T., Nakata, T., Wakabayashi, T., & Hirokawa, N. (1994). Direct  
595 visualization of the microtubule lattice seam both in vitro and in vivo. *The Journal of Cell*  
596 *Biology*, *127*(6 Pt 2), 1965–1971. <https://doi.org/10.1083/jcb.127.6.1965>

- 597 Klebl, D. P., Wang, Y., Sobott, F., Thompson, R. F., & Muench, S. P. (2022). It started with a  
598 Cys $\square$ : Spontaneous cysteine modification during cryo-EM grid preparation. *Frontiers in*  
599 *Molecular Biosciences*, 9. <https://www.frontiersin.org/articles/10.3389/fmolb.2022.945772>
- 600 Kremer, J. R., Mastronarde, D. N., & McIntosh, J. R. (1996). Computer Visualization of  
601 Three-Dimensional Image Data Using IMOD. *Journal of Structural Biology*, 116(1), 71 $\square$ 76.  
602 <https://doi.org/10.1006/jsbi.1996.0013>
- 603 Li, B., Zhu, D., Shi, H., & Zhang, X. (2021). Effect of charge on protein preferred orientation  
604 at the air–water interface in cryo-electron microscopy. *Journal of Structural Biology*, 213(4),  
605 107783. <https://doi.org/10.1016/j.jsb.2021.107783>
- 606 Manka, S. W., & Moores, C. A. (2018). Microtubule structure by cryo-EM $\square$ : Snapshots of  
607 dynamic instability. *Essays in Biochemistry*, 62(6), 737 $\square$ 751.  
608 <https://doi.org/10.1042/EBC20180031>
- 609 Mastronarde, D. N. (1997). Dual-Axis Tomography $\square$ : An Approach with Alignment  
610 Methods That Preserve Resolution. *Journal of Structural Biology*, 120(3), 343 $\square$ 352.  
611 <https://doi.org/10.1006/jsbi.1997.3919>
- 612 Maurer, S. P., Fourniol, F. J., Bohner, G., Moores, C. A., & Surrey, T. (2012). EBs recognize  
613 a nucleotide-dependent structural cap at growing microtubule ends. *Cell*, 149(2), 371 $\square$ 382.  
614 <https://doi.org/10.1016/j.cell.2012.02.049>
- 615 McEwen, B., & Edelstein, S. J. (1980). Evidence for a mixed lattice in microtubules  
616 reassembled in vitro. *Journal of Molecular Biology*, 139(2), 123 $\square$ 143.  
617 [https://doi.org/10.1016/0022-2836\(80\)90300-9](https://doi.org/10.1016/0022-2836(80)90300-9)
- 618 McIntosh, J. R., Mophew, M. K., Grissom, P. M., Gilbert, S. P., & Hoenger, A. (2009).  
619 Lattice structure of cytoplasmic microtubules in a cultured Mammalian cell. *Journal of*  
620 *Molecular Biology*, 394(2), 177 $\square$ 182. <https://doi.org/10.1016/j.jmb.2009.09.033>
- 621 McIntosh, J. R., O'Toole, E., Morgan, G., Austin, J., Ulyanov, E., Ataullakhanov, F., &

- 622 Gudimchuk, N. (2018). Microtubules grow by the addition of bent guanosine triphosphate  
623 tubulin to the tips of curved protofilaments. *Journal of Cell Biology*, 217(8), 2691–2708.  
624 <https://doi.org/10.1083/jcb.201802138>
- 625 Mitchison, T., & Kirschner, M. (1984). Dynamic instability of microtubule growth. *Nature*,  
626 312(5991), 237–242. <https://doi.org/10.1038/312237a0>
- 627 Murray, A. W. (1991). Cell cycle extracts. *Methods in Cell Biology*, 36, 581–605.
- 628 Nicastro, D., Schwartz, C., Pierson, J., Gaudette, R., Porter, M. E., & McIntosh, J. R. (2006).  
629 The Molecular Architecture of Axonemes Revealed by Cryoelectron Tomography. *Science*,  
630 313(5789), 944–948. <https://doi.org/10.1126/science.1128618>
- 631 Olieric, N., Kuchen, M., Wagen, S., Sauter, M., Crone, S., Edmondson, S., Frey, D.,  
632 Ostermeier, C., Steinmetz, M. O., & Jaussi, R. (2010). Automated seamless DNA co-  
633 transformation cloning with direct expression vectors applying positive or negative insert  
634 selection. *BMC Biotechnology*, 10(1), 56. <https://doi.org/10.1186/1472-6750-10-56>
- 635 Pantaloni, D., & Carlier, M.-F. (1986). Involvement of Guanosine Triphosphate (GTP)  
636 Hydrolysis in the Mechanism of Tubulin Polymerization: Regulation of Microtubule  
637 Dynamics at Steady State by a GTP Cap. *Annals of the New York Academy of Sciences*,  
638 466(1), 496–509. <https://doi.org/10.1111/j.1749-6632.1986.tb38427.x>
- 639 Rai, A., Liu, T., Katrukha, E. A., Estévez-Gallego, J., Manka, S. W., Paterson, I., Díaz, J. F.,  
640 Kapitein, L. C., Moores, C. A., & Akhmanova, A. (2021). Lattice defects induced by  
641 microtubule-stabilizing agents exert a long-range effect on microtubule growth by promoting  
642 catastrophes. *Proceedings of the National Academy of Sciences*, 118(51), e2112261118.  
643 <https://doi.org/10.1073/pnas.2112261118>
- 644 Rothwell, S. W., Grasser, W. A., & Murphy, D. B. (1986). End-to-end annealing of  
645 microtubules in vitro. *The Journal of Cell Biology*, 102(2), 619–627.  
646 <https://doi.org/10.1083/jcb.102.2.619>

647 Sawin, K. E., & Mitchison, T. J. (1994). Microtubule flux in mitosis is independent of  
648 chromosomes, centrosomes, and antiparallel microtubules. *Molecular Biology of the Cell*,  
649 5(2), 217–226. <https://doi.org/10.1091/mbc.5.2.217>

650 Schaedel, L., Triclin, S., Chrétien, D., Abrieu, A., Aumeier, C., Gaillard, J., Blanchoin, L.,  
651 Théry, M., & John, K. (2019). Lattice defects induce microtubule self-renewal. *Nature*  
652 *Physics*, 15(8), 830–838. <https://doi.org/10.1038/s41567-019-0542-4>

653 Song, Y. H., & Mandelkow, E. (1993). Recombinant kinesin motor domain binds to beta-  
654 tubulin and decorates microtubules with a B surface lattice. *Proceedings of the National*  
655 *Academy of Sciences of the United States of America*, 90(5), 1671–1675.  
656 <https://doi.org/10.1073/pnas.90.5.1671>

657 Song, Y. H., & Mandelkow, E. (1995). The anatomy of flagellar microtubules: Polarity,  
658 seam, junctions, and lattice. *The Journal of Cell Biology*, 128(1–2), 81–94.  
659 <https://doi.org/10.1083/jcb.128.1.81>

660 Sosa, H., Hoenger, A., & Milligan, R. A. (1997). Three different approaches for calculating  
661 the three-dimensional structure of microtubules decorated with kinesin motor domains.  
662 *Journal of Structural Biology*, 118(2), 149–158. <https://doi.org/10.1006/jsbi.1997.3851>

663 Théry, M., & Blanchoin, L. (2021). Microtubule self-repair. *Current Opinion in Cell Biology*,  
664 68, 144–154. <https://doi.org/10.1016/j.ceb.2020.10.012>

665 Vitre, B., Coquelle, F. M., Heichette, C., Garnier, C., Chrétien, D., & Arnal, I. (2008). EB1  
666 regulates microtubule dynamics and tubulin sheet closure in vitro. *Nature Cell Biology*, 10(4),  
667 415–421. <https://doi.org/10.1038/ncb1703>

668 Wade, R. H., & Chrétien, D. (1993). Cryoelectron microscopy of microtubules. *Journal of*  
669 *Structural Biology*, 110(1), 1–27. <https://doi.org/10.1006/jsbi.1993.1001>

670 Zabeo, D., Heumann, J. M., Schwartz, C. L., Suzuki-Shinjo, A., Morgan, G., Widlund, P. O.,  
671 & Höög, J. L. (2018). A lumenal interrupted helix in human sperm tail microtubules.

672 *Scientific Reports*, 8(1), 2727. <https://doi.org/10.1038/s41598-018-21165-8>

673 Zhang, R., Alushin, G. M., Brown, A., & Nogales, E. (2015). Mechanistic Origin of

674 Microtubule Dynamic Instability and Its Modulation by EB Proteins. *Cell*, 162(4), 849–859.

675 <https://doi.org/10.1016/j.cell.2015.07.012>

676

677



678 **Figures**

679 **Figure 1**

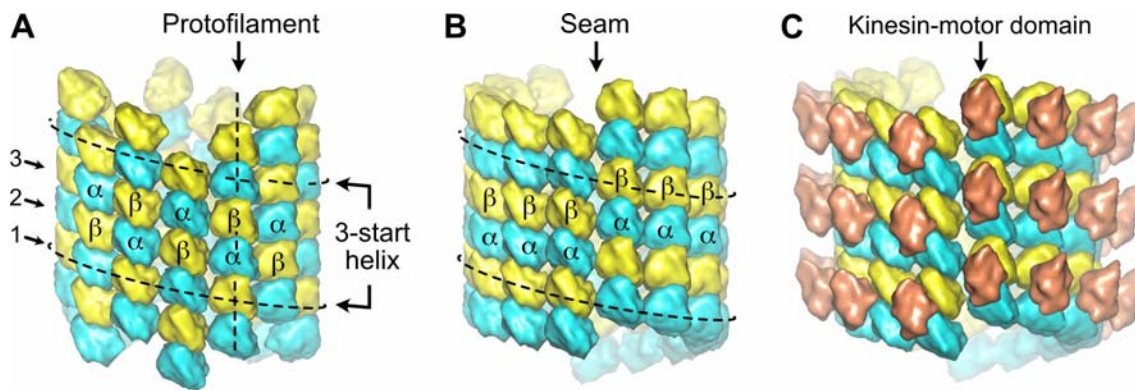

680

681 **Organization of tubulin within microtubules**

682 The  $\alpha\beta$ -tubulin heterodimers ( $\alpha$  in cyan,  $\beta$  in yellow) alternate head-to-tail along  
683 protofilaments, 13 of which associate laterally to form the microtubule wall. (A) In the A-type  
684 lattice, the lateral contacts are made between heterotypic subunits ( $\alpha$ - $\beta$ ,  $\beta$ - $\alpha$ ) along the 3-start  
685 helices. (B) In the B-type lattice, the lateral contacts are made between homotypic subunits  
686 ( $\alpha$ - $\alpha$ ,  $\beta$ - $\beta$ ), except at one unique region of the A-type called the seam. (C) Decoration of  
687 microtubules with kinesin-motor domains (orange) that bind to  $\beta$ -tubulin highlights the  
688 organization of the tubulin heterodimer within microtubules.

689

690 **Figure 2**

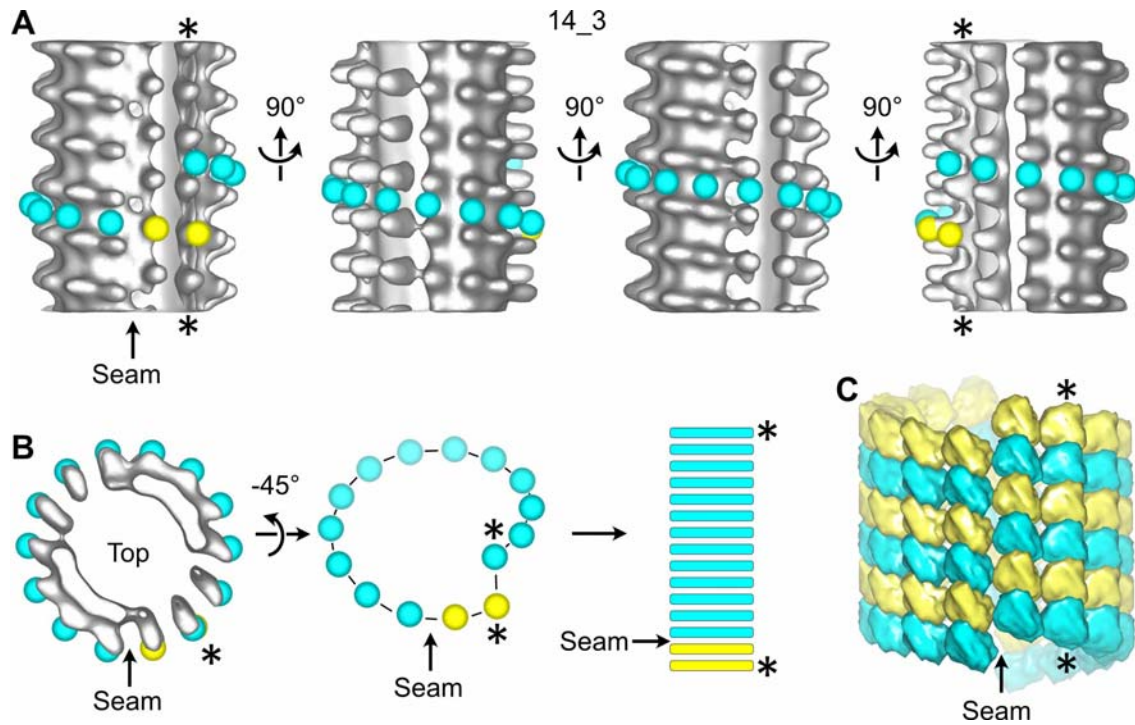

691

692 **Sub-tomogram averaging of a 14<sub>3</sub> microtubule with a unique seam**

693 (A) Sub-tomogram average of a 1390.4 nm long 14<sub>3</sub> microtubule assembled *in vitro* from  
694 purified tubulin and decorated with kinesin-motor domains (Figure 2 - figure supplement 3A:  
695 MT3, Video 2). The panel displays 4 views turned by 90° with respect to the longitudinal axis  
696 of the microtubule. Yellow spheres have been placed onto the kinesin-motor domain densities  
697 and cyan spheres in between them. They follow the left-handed, three-start helix of the  
698 microtubule lattice. The seam shows up as a change in color from yellow to cyan. (B)  
699 Symbolic representation of the microtubule lattice. The top view of the microtubule in (A) is  
700 turned by 45° around the X-axis and the density is masked to reveal the organization of the  
701 tubulin subunits in one turn of the three-start helix. The helix is unrolled and represented as  
702 longitudinal bars that correspond to the organization of the αβ-subunits in microtubule  
703 segments. (C) 3D model of the underlying tubulin dimer lattice. The stars (\*) indicate the  
704 same protofilament in (A-C).

705

706 **Figure 3**

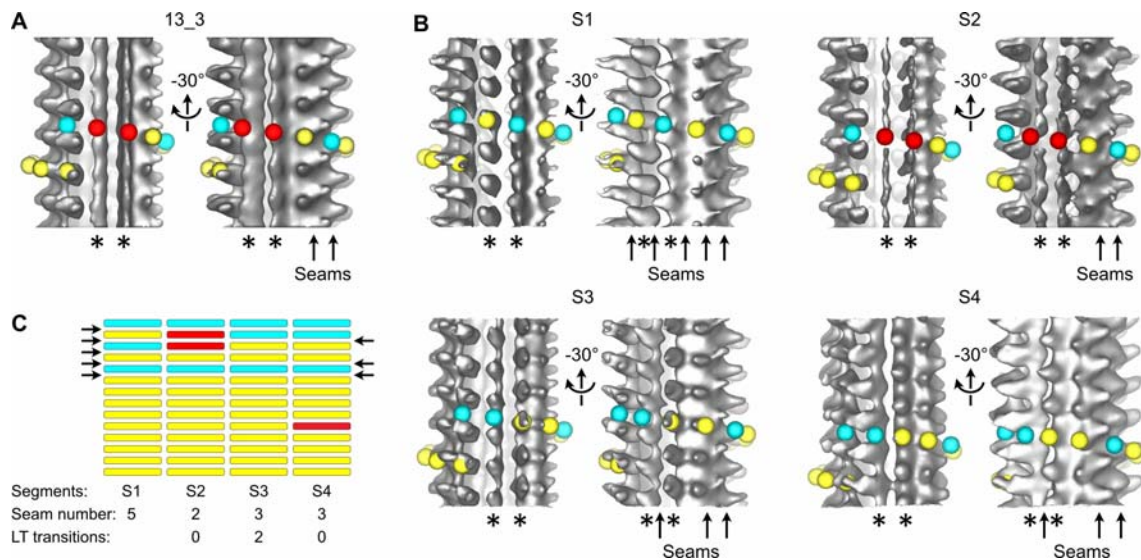

707

708 **Transition in seam number within a 13<sub>3</sub> microtubule**

709 (A) Average of a 1327.2 nm long 13<sub>3</sub> microtubule displaying two aberrant protofilaments  
 710 (\*), and two adjacent seams (arrows in the -30° view). Red spheres have been placed on top  
 711 of the aberrant protofilaments. (B) Segmented sub-tomogram averaging of the microtubule in  
 712 (A). The microtubule has been divided into 4 segments of 331.8 nm in length, and sub-  
 713 tomogram averages have been calculated for each segment (S1 to S4). The two aberrant  
 714 protofilaments in (A) are well resolved in S1, S3 and S4, while they still display an aberrant  
 715 shape in S2. The lattice organization of these protofilaments must be offset by at least one  
 716 tubulin subunit between S1 and S3. Hence, S2 constitutes a transition zone where kinesin-  
 717 motor domain densities and absence of densities have been averaged. (C) Flat representation  
 718 of the lattice organization within segments S1 to S4. S1 contains 5 seams while S3 and S4  
 719 contain 3 seams (arrows). Two lattice type (LT) transitions occur between S1 and S3, and S4  
 720 contains an aberrant protofilament (Video 3). A finer segmentation of the microtubule at  
 721 165.9 nm revealed an additional lattice type transition in this region (Figure 3 - figure  
 722 supplement 3A: MT5, between segments S5 and S7).

723

724 **Figure 4**

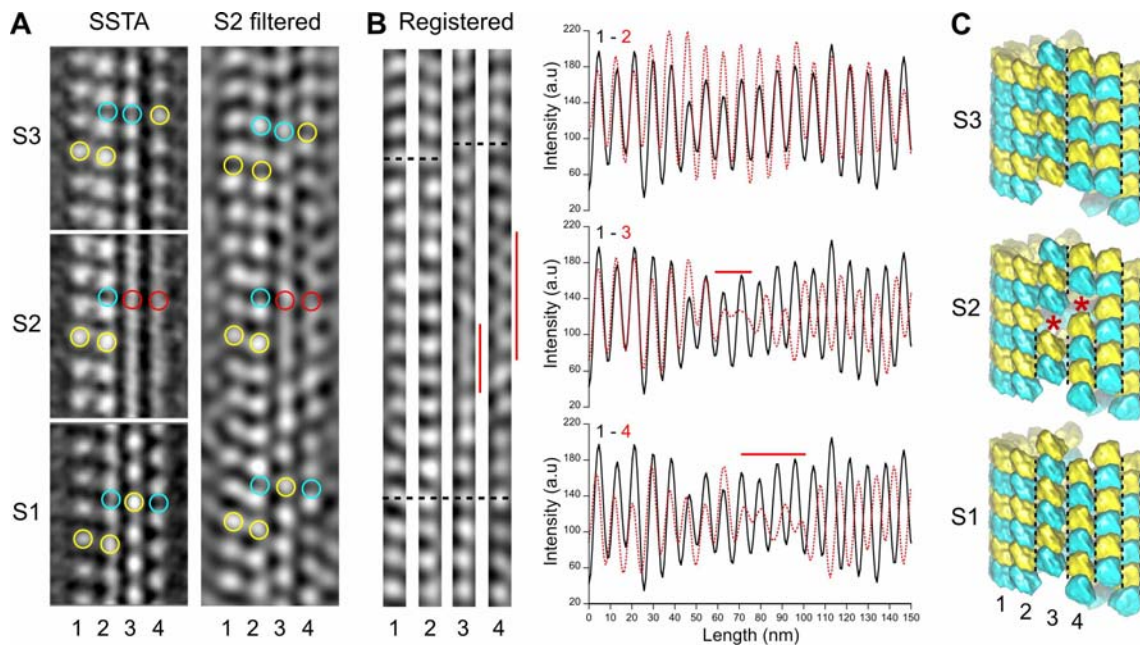

725

726 **Comparison between SSTA and Fourier filtered images of transition regions**

727 (A) SSTA: slices through the sub-tomogram averages of segments S1 to S3 in Figure 3B  
728 (left). The contrast has been inverted with respect to the original tomogram to represent  
729 protein densities as white. Yellow open circles have been placed on kinesin-motor domain  
730 densities, cyan open circles in between them, and red open circles on aberrant densities in S2.  
731 S2 filtered: slice through the filtered tomogram of the S2 region (right). The change in lattice  
732 seam number from S1 to S3 is clearly visualized in the S2 region. (B) Protofilaments 1 to 4 in  
733 (A) have been extracted from the filtered image and put into register (Registered, left). They  
734 remain in phase (bottom dotted line) until the densities in protofilaments 3 and 4 becomes  
735 fuzzy (vertical red lines). After these transition zones, the kinesin-motor domain periodicity  
736 in protofilaments 3 and 4 becomes out of phase with respect to that in protofilaments 1 and 2  
737 (upper dotted lines). These changes in kinesin-motor domain periodicity are confirmed in the  
738 line plots of the protofilaments (right). While the kinesin-motor domain periodicity in  
739 protofilaments 1 and 2 remain perfectly in phase (upper graph), it becomes out of phase for  
740 protofilaments 3 and 4 after the transition zones (middle and bottom graphs). (C) Schematic

741 representation of the  $\alpha\beta$ -tubulin heterodimer organization in segments S1 to S3. The  
742 transition from 5 seams in S1 to 3 seams in S3 requires an offset of at least one monomer (red  
743 stars) in the protofilaments 3 and 4 of S2. Black dotted lines highlight the seams in each  
744 segment.  
745



746 **Figure 5**

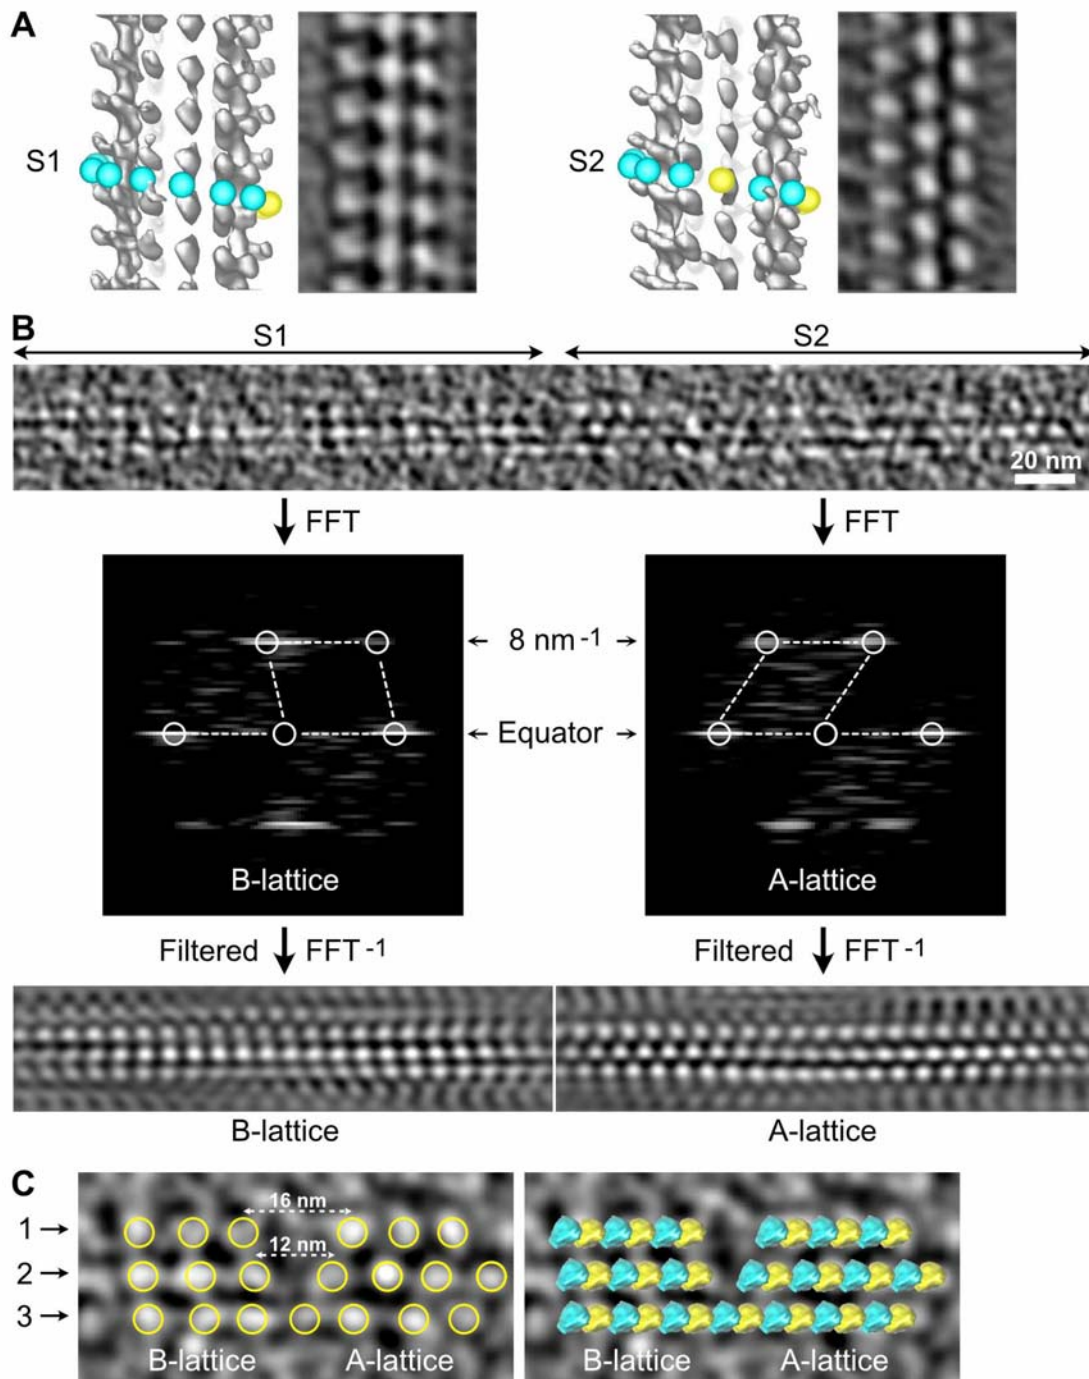

747

748 **Direct visualization of holes within microtubules**

749 (A) Sub-tomogram average segments before (S1) and after (S2) a lattice type transition in a

750 GMPCPP-microtubule. For each segment, the isosurface of the full volume (*left*) and a slice

751 through the sub-tomogram average (*right*) are displayed. The contrast has been inverted to

752 represent protein density as white. S1 and S2 contain 1 and 3 seams, respectively. **(B)** Z-  
753 projection of 20 slices at the surface of the microtubule that encompasses S1 and S2 (*top*)  
754 with their associated Fourier transforms (*middle*) and filtered versions of the corresponding  
755 regions after selection of the equatorial and  $8 \text{ nm}^{-1}$  layer lines (*bottom*). The 3 protofilaments  
756 in S1 and S2 are organized according to a B- and an A-lattice, respectively. **(C)** Enlarged  
757 central region of the microtubule in (B). Yellow open circles have been placed on the kinesin  
758 densities (*left*), showing a gap of one subunit in protofilament 2, and possibly of a dimer in  
759 protofilament 1, although an absence of kinesin-motor domain at this location cannot be  
760 excluded. Tubulin heterodimers have been placed at the corresponding location (*right*) to  
761 highlight their change in organization at the transition region.

762 **Figure 6**

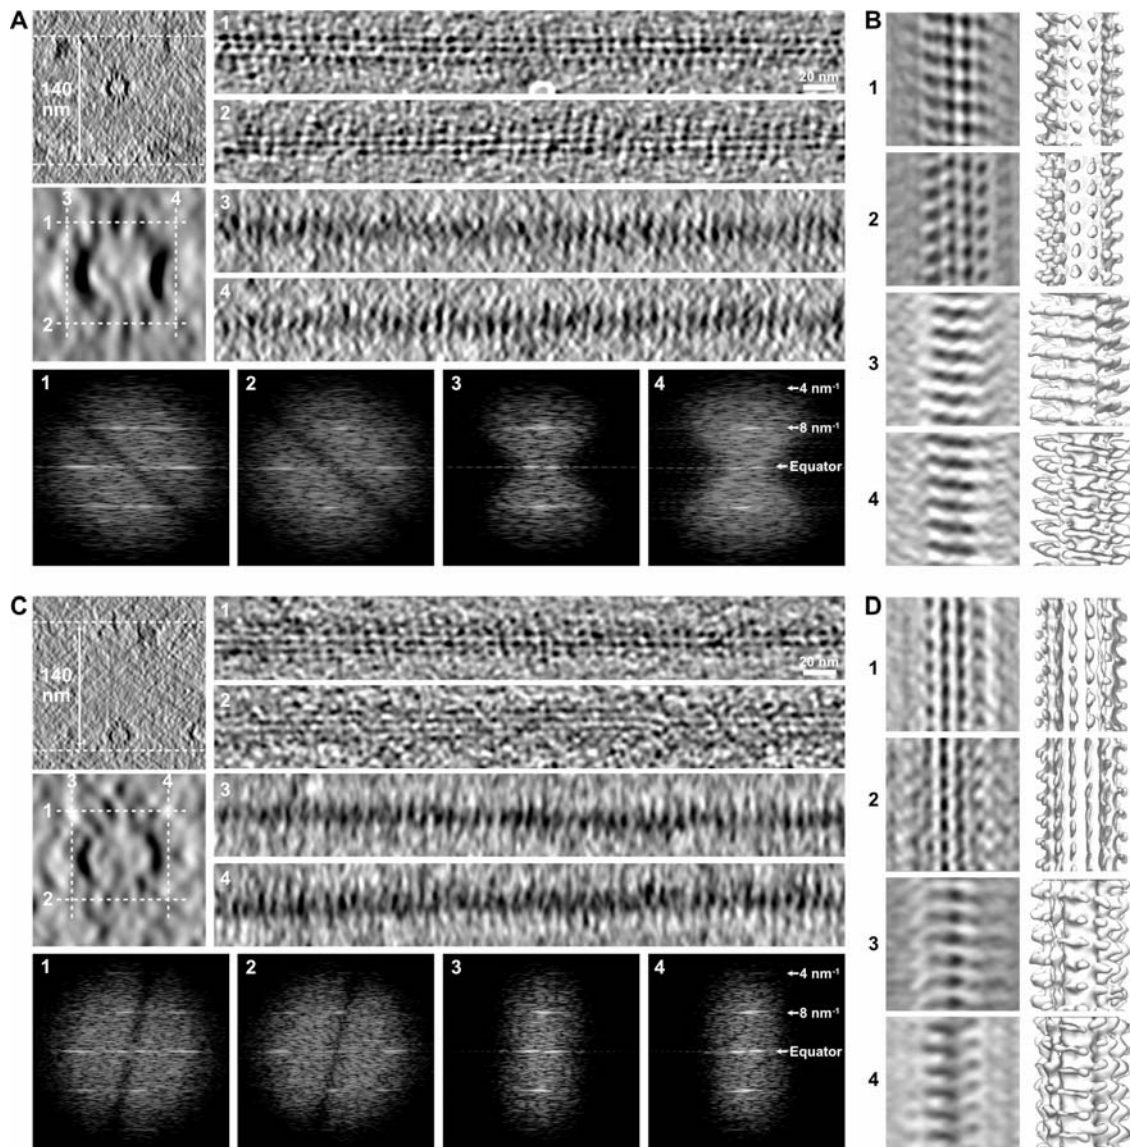

763

764 **Limitations in the visualization of holes in raw tomograms**

765 (A) Microtubule embedded in a ~140 nm thick ice layer (*top left*). Longitudinal sections  
766 (averages of 20 slices, *right*) were performed at the top (1), bottom (2), left (3) and right (4) of  
767 the microtubule at positions indicated by white dotted lines in the enlarged view of the  
768 microtubule (*middle left*, average of 50 slices). Kinesin-motor domain densities can be  
769 individualized on the top (1) and bottom (2) sections, but not on the edges of the microtubules  
770 (3, 4) due to the elongation of densities in Z as a consequence of missing data at high angle.



771 The Fourier transforms of the corresponding segments (*bottom*) shows that the  $8 \text{ nm}^{-1}$   
772 periodicity of the kinesin-motor domains remains present in all views. **(B)** Sub-tomogram  
773 average of the microtubule in (A) over 18 kinesin-motor domain repeats. Sections (*left*) and  
774 isosurfaces (*right*) of the microtubule are displayed in correspondence to the longitudinal  
775 sections in (A). The kinesin-motor domain position is clearly observed on the top (1) and  
776 bottom (2) surfaces, and can be recovered on the microtubule edges after SSTA (3, 4). **(C)**  
777 Microtubule in the same tomogram as in (A) interacting with the air-water interface (*top left*).  
778 Kinesin-motor domain densities can be well discerned on the longitudinal sections (*right*) of  
779 the top surface facing the solution (1), but are almost indiscernible on the bottom surface that  
780 interacts with the air-water interface (2) and on the edges (3, 4). Fourier transforms (*bottom*)  
781 of the corresponding segments show that the periodicity of the kinesin-motor domains is still  
782 present, even on the damaged surface (2). **(D)** Sub-tomogram average of the microtubule in  
783 (C) over 18 kinesin-motor domain repeats. SSTA allows recovery of the kinesin-motor  
784 domain densities in all surfaces, including the one that interacts with the air-water interface  
785 (2).  
786

787 **Figure 7**

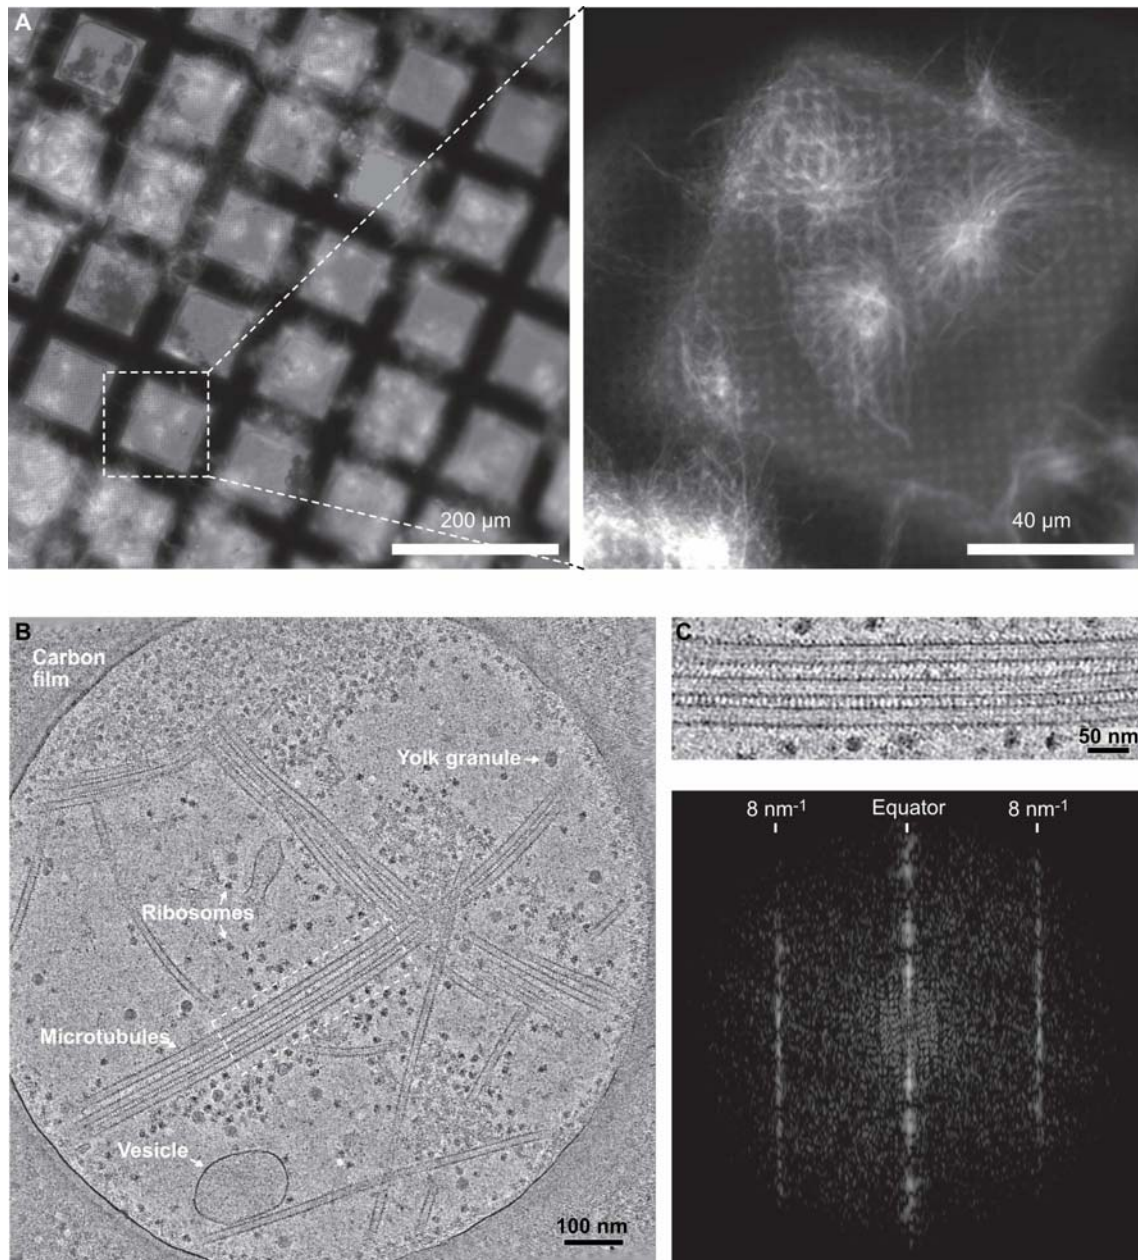

788

789 **Cryo-electron tomography of microtubules decorated by kinesin-motor domains in**

790 ***Xenopus* egg cytoplasmic extracts**

791 (A) Cryo-fluorescence images of microtubules assembled in a cytoplasmic extract prepared

792 from *Xenopus* eggs. Microtubules assembled in the presence of rhodamine-tubulin and

793 plunge-frozen on an EM grid were imaged using fluorescence microscopy at liquid nitrogen

794 temperature. Left: 10 X objective, right: 50 X objective. The white dashed square on the 10 X

795 image indicates the field of view of the 50 X image. **(B)** Average of 30 slices in Z through a  
796 cryo-electron tomogram. The thin layer of cytoplasm spans a 2  $\mu\text{m}$  diameter hole of the  
797 carbon film. The main visible features are ribosomes, vesicles, yolk granules and  
798 microtubules decorated by kinesin-motor domains. **(C)** *Top*, enlargement of the dotted  
799 rectangular region in (B) (Video 4). *Bottom*, Fourier transform of the top image showing  
800 strong layer lines at  $8 \text{ nm}^{-1}$  corresponding to the kinesin-motor domain repeat along the  
801 microtubules.  
802

803 **Figure 8**

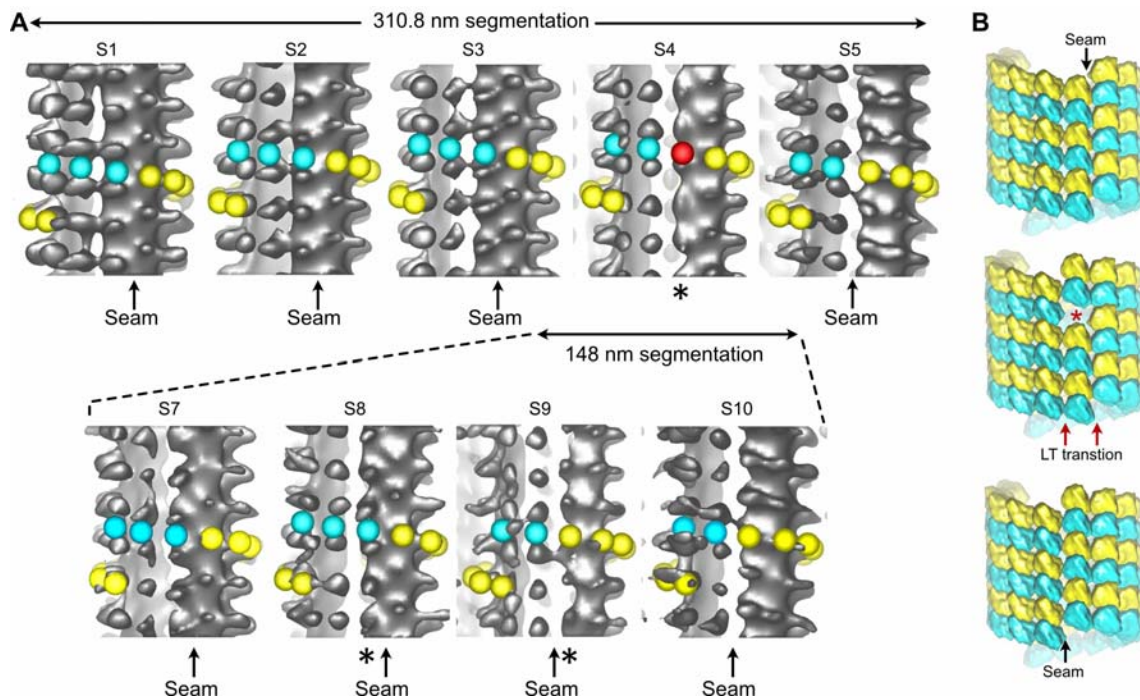

804

805 **SSTA of microtubules decorated by kinesin-motor domains in *Xenopus* egg cytoplasmic**  
806 **extracts**

807 (A) Sub-tomogram averages of five 310.8 nm long segments of a 13\_3 microtubule (original  
808 length 1628 nm, *top*). S4 contains an aberrant protofilament (\*), and the seam (arrow) moves  
809 laterally to the left by one protofilament from S3 to S5. The microtubule has been segmented  
810 into eleven 148 nm long segments (*bottom*, Figure 8 - figure supplement 5A: MT2). Only S7 to  
811 S10 are shown, corresponding to a region that encompasses S3 to S5 in the 310.8 nm  
812 segmentation (Video 5). The lattice type transition occurs from S8 to S9, and no aberrant  
813 protofilament is observed in this finer segmentation. (B) 3D models of the tubulin lattice  
814 before (*top*), during (*middle*) and after (*bottom*) the transition. The lateral offset in seam  
815 position requires a longitudinal offset of a minimum of one tubulin subunit to account for the  
816 lattice type transition observed in (A).

817

818 **Figure 9**

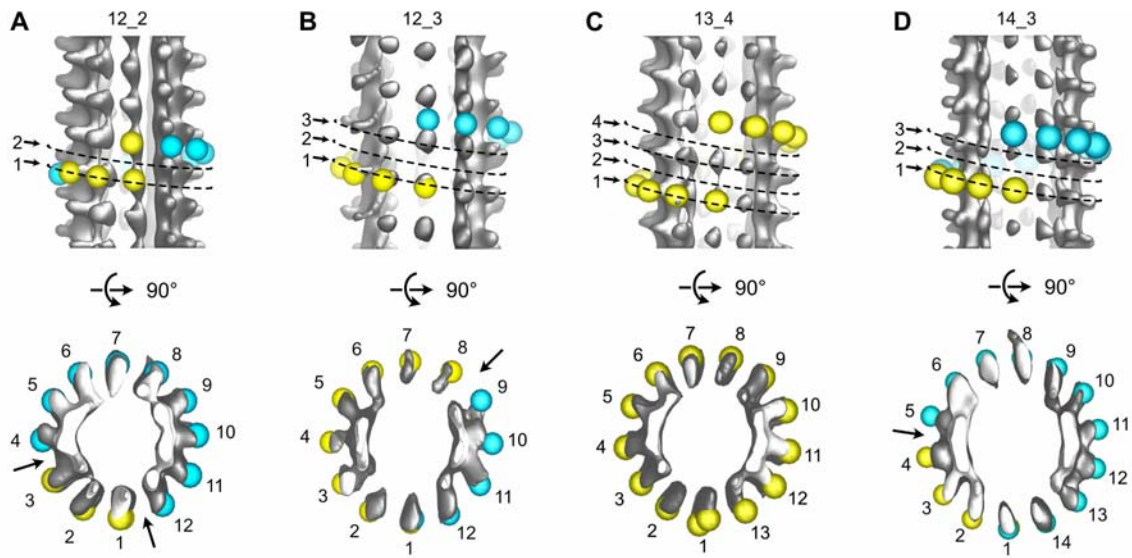

820 **Variations in protofilament and helix-start numbers in microtubules assembled in**

821 *Xenopus* egg cytoplasmic extracts

822 (A) 12\_2 microtubule with two seams (Figure 9 - figure supplement 5A: MT9). (B) 12\_3

823 microtubule with a unique seam. This microtubule transitioned to a 13\_3 configuration

824 (Figure 9 - figure supplement 5D: MT62). (C) 13\_4 microtubule with no seam. This

825 microtubule transitioned to a 13\_3 configuration (Figure 9 - figure supplement 5A: MT7). (D)

826 14\_3 microtubule with one seam. This microtubule transitioned to a 13\_3 configuration

827 (Figure 9 - figure supplement 5B: MT32).

828



829 **Figure 10**

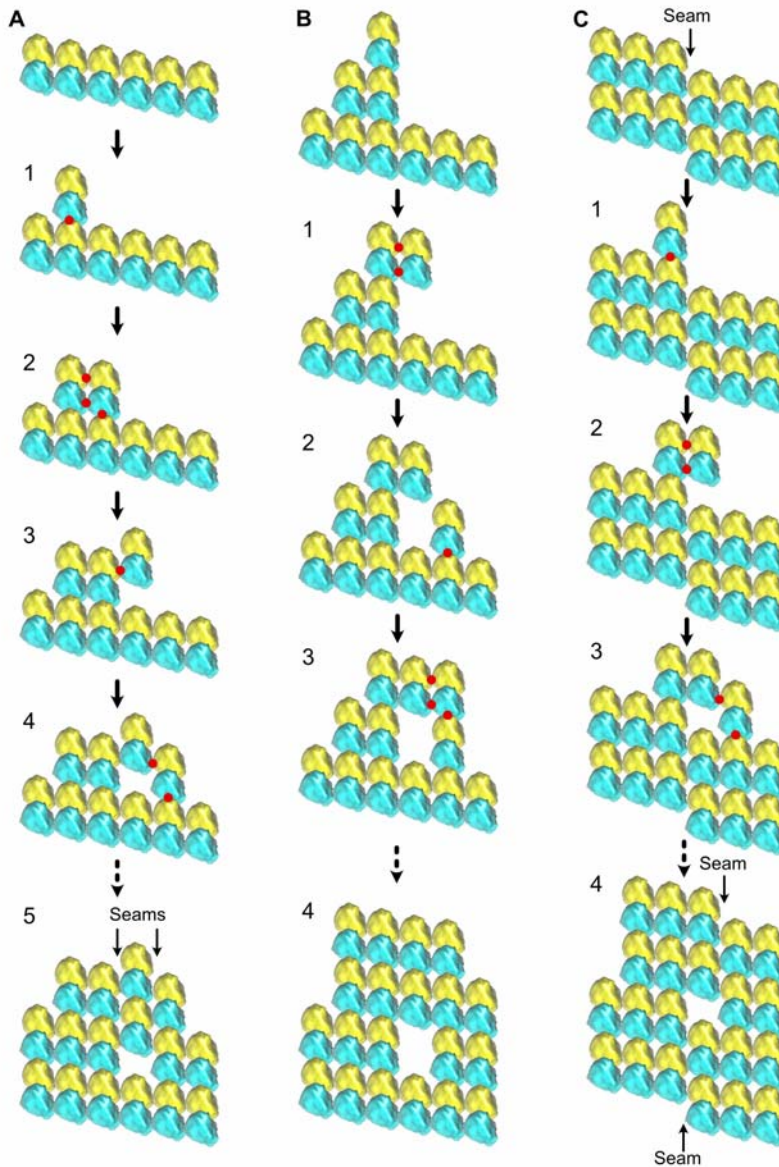

830

831 **Formation of holes within microtubules during assembly**

832 (A) Formation of multiple seams, red dots indicate new interactions. 1) Unique longitudinal  
833 interaction. 2) Combined lateral and longitudinal interactions. 3) Unique lateral interaction  
834 between one  $\alpha$ -tubulin subunit of an incoming tubulin dimer and a  $\beta$ -tubulin subunit at the tip  
835 of the growing microtubule. 4-5) Incorporation of a hole within the microtubule lattice. Two  
836 A-lattice seams have been formed (arrows). (B) Incorporation of a tubulin dimer gap without

837 change in lattice type organization. 1) Homotypic lateral interaction of an incoming tubulin  
838 dimer without longitudinal interaction. 2-5) Incorporation of a tubulin dimer gap inside the  
839 microtubule lattice. (C) Lateral offset of the seam by one protofilament during elongation. 1)  
840 Unique longitudinal interaction. 2) Homotypic interaction of an incoming dimer at the seam  
841 region without longitudinal contact. 3-4) Incorporation of a lattice type transition inside the  
842 microtubule wall. The seam has moved laterally by one protofilament (4), a situation  
843 systematically encountered in cytoplasmic extract microtubules.  
844

845 **Figure supplement 1**

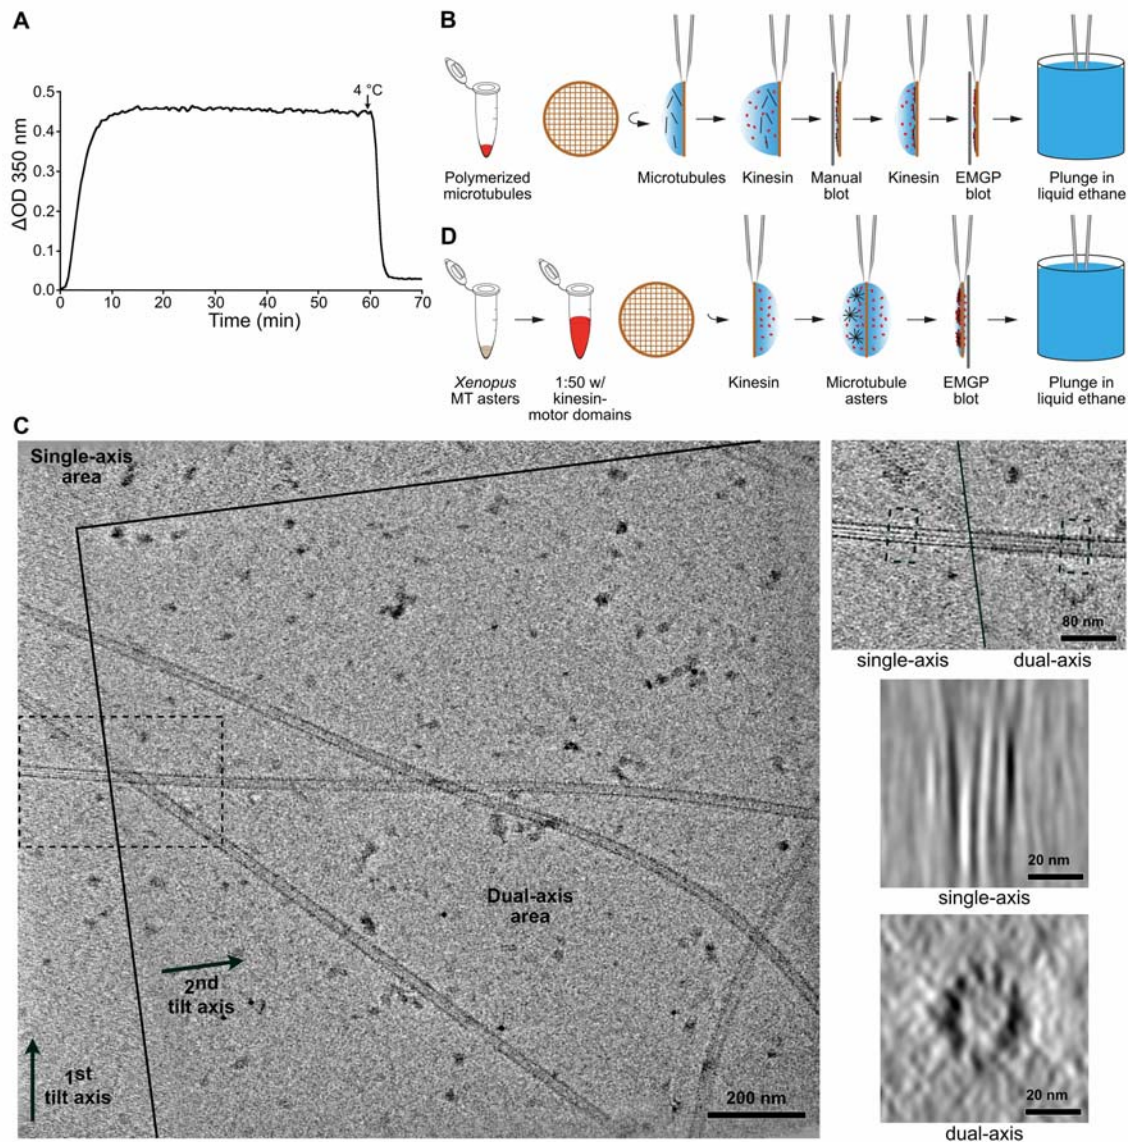

846

847 **Preparation of microtubules for cryo-electron tomography**

848 (A) Microtubule assembly at 40  $\mu$ M tubulin in BRB80, 1 mM GTP, 35 °C. Variation of  
849 optical density ( $\Delta OD$ ) at 350 nm versus time (min). A cooling step was typically performed at  
850 the end of the experiment to assess the presence of aggregates evidenced by the value of the  
851 baseline at 4 °C. Samples for cryo-electron microscopy were prepared after ~1 hour of  
852 polymerization. (B) Decoration of microtubules assembled *in vitro* from purified tubulin with



853 kinesin-motor domains. Kinesin decoration is performed right before vitrification of the  
854 sample into liquid ethane. **(C)** Dual-axis cryo-electron tomography. *Left*: The dual-axis area is  
855 delimited by plain lines; arrows indicate the two tilt axes. *Right top*: Enlargement of the  
856 dotted region in the overall view that encompass the single and dual axes regions of the  
857 tomogram. A microtubule oriented close to the perpendicular of the 1<sup>st</sup> tilt axis spans the two  
858 regions (Video 1). *Right middle*: Average of 50 slices along the microtubule in the single-axis  
859 area. The microtubule is severely elongated in the Z direction. *Right bottom*: The same  
860 microtubule visualized in the dual-axis area. Individual protofilaments are clearly  
861 individualized. **(D)** Decoration of microtubules assembled in *Xenopus* egg cytoplasmic  
862 extracts. Microtubule asters are deposited on one side of the grid, which is subsequently  
863 blotted from the opposite side.  
864

865 **Figure supplement 2**

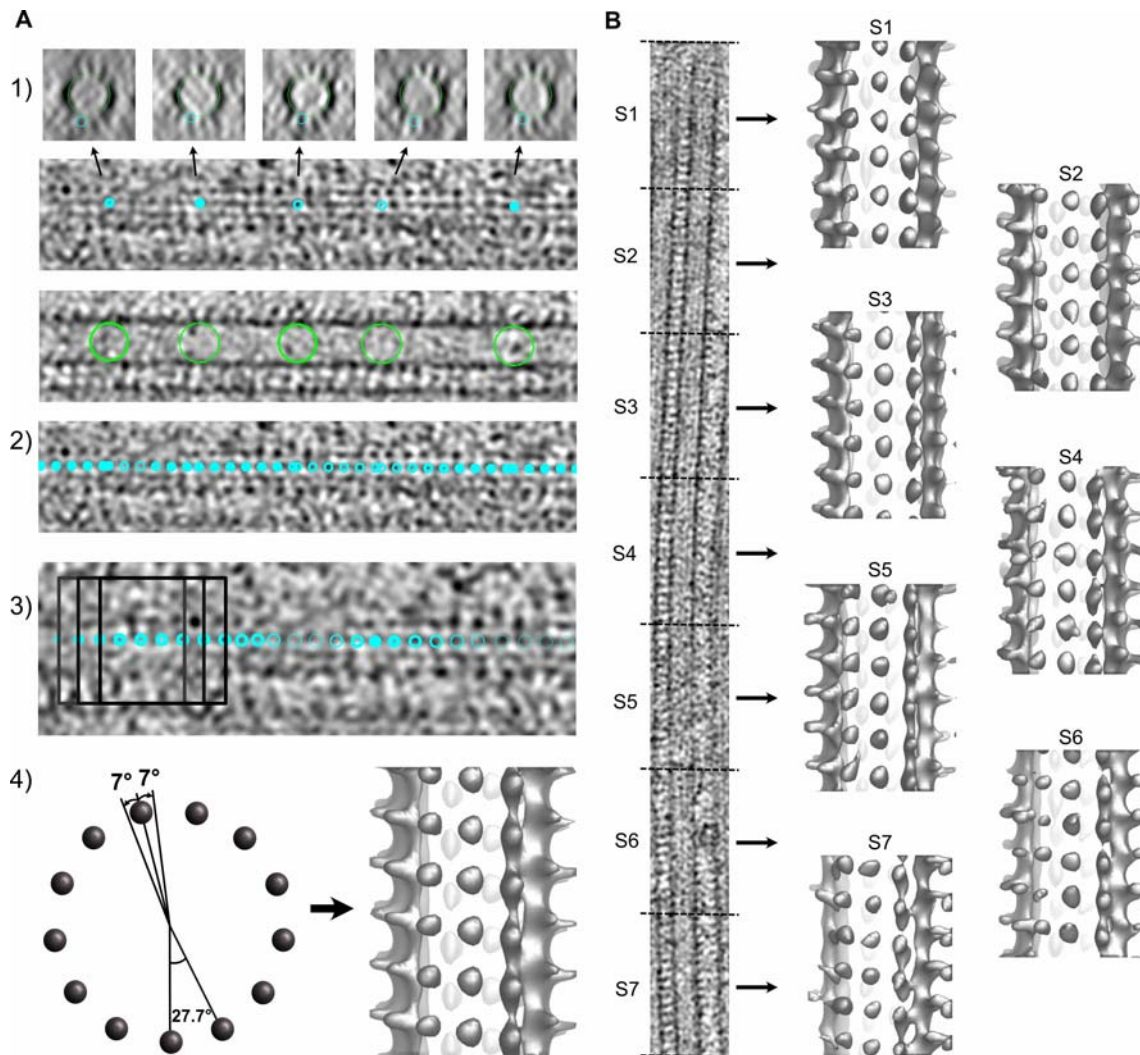

866

867 **Segmented sub-tomogram averaging of microtubules decorated with kinesin motor**  
868 **domains**

869 (A) Sub-tomogram averaging (STA). (1) A first model is created by placing model points  
870 onto individual protofilaments (small cyan circles) and at the microtubule center (large green  
871 circles). (2) A second model is extrapolated from the previous one with points spaced every  
872 ~8 nm along the microtubule. (3) Sub-volumes (dark squares) are extracted at every point  
873 position and aligned by cross-correlation using PEET. (4) The rotational search around the  
874 microtubule axis is restricted to about half the angular separation between protofilaments  
875 (left). The resulting average is displayed in isosurface rendering in IMOD (right). (B)

876 Segmented sub-tomogram averaging (SSTA). The model and motive list used to calculate the  
877 whole tomogram of the microtubule is split into shorter segments of equal dimensions and  
878 sub-tomograms are calculated for each segment (S1 to S7). The segment size is limited by the  
879 signal-to-noise ratio present in the tomograms (typically ~160 nm with our current data).  
880

881 **Figure supplement 3A**

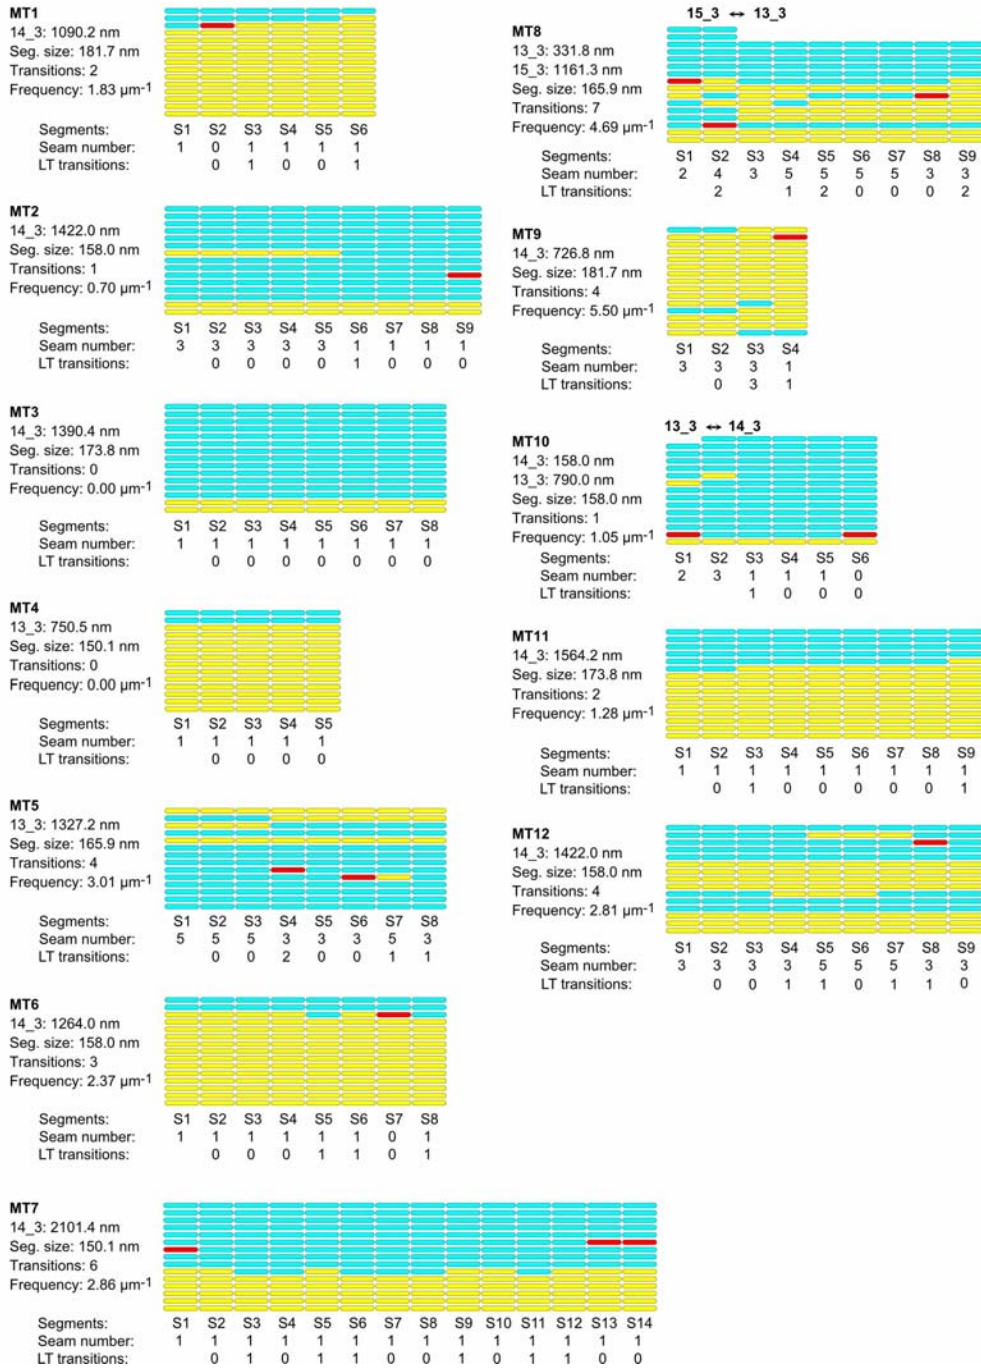



883 **Figure supplement 3B**

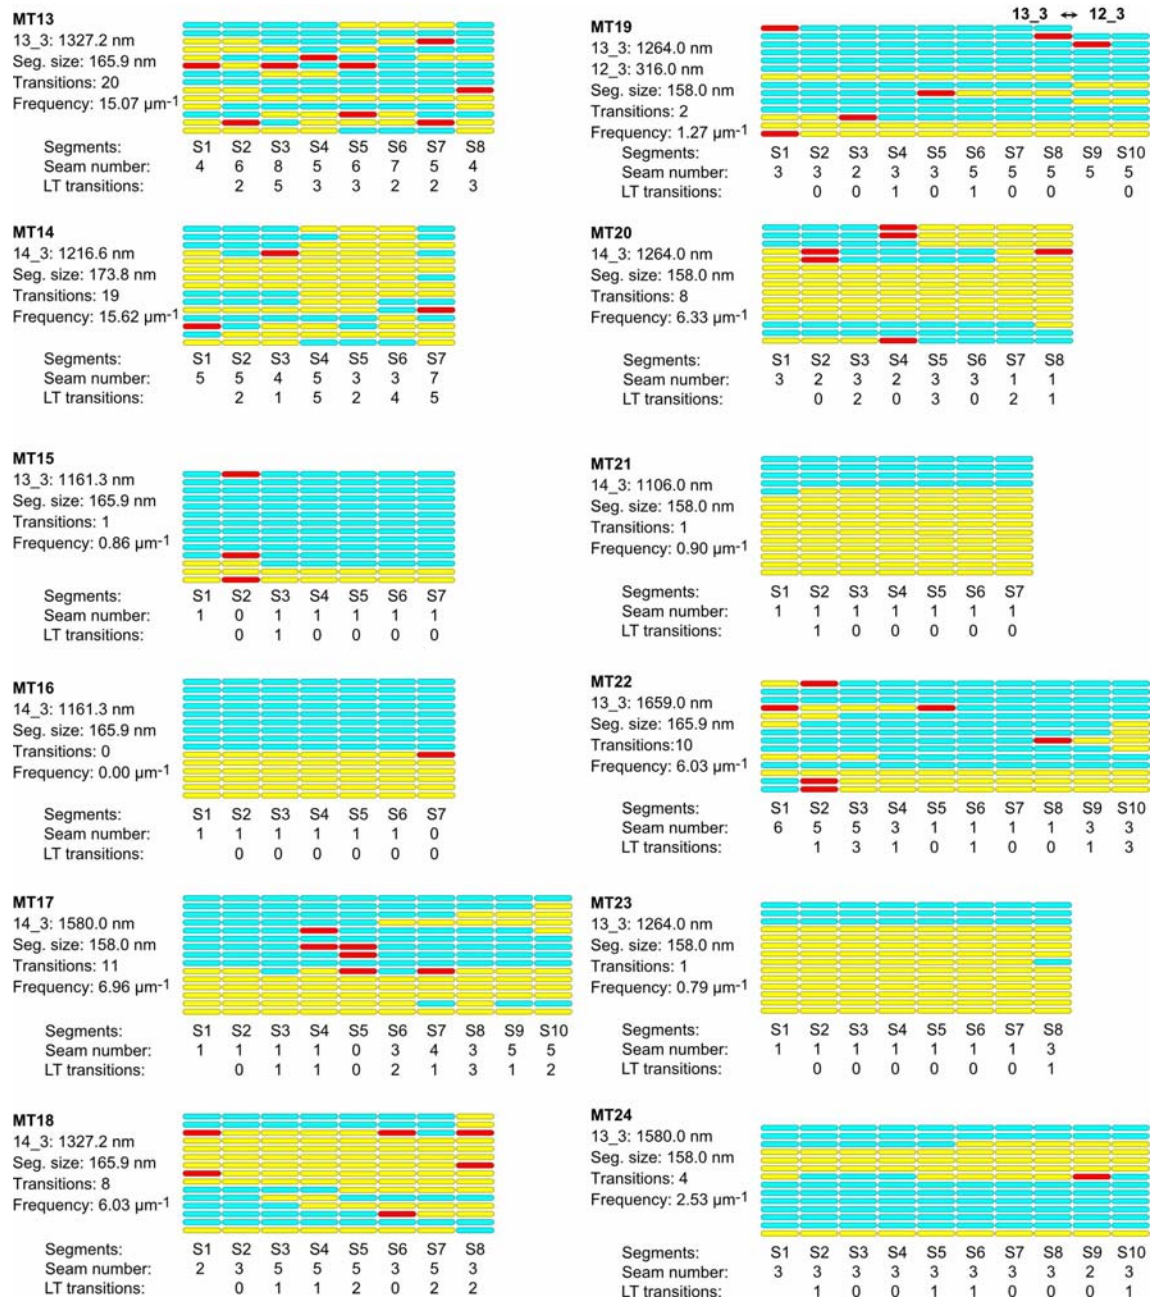

884

885 **Lattice organization of microtubules assembled *in vitro* from purified porcine brain**

886 **tubulin in the presence of GTP**

887 24 microtubules (31.7  $\mu\text{m}$  in total length) were analyzed on 4 tomograms acquired on 2

888 independent samples. Number of microtubule segments: 195; number of lateral interactions:

889 2664 (A type: 461, B type: 2091, ND: 112); lattice type transitions: 119;

890 protofilament/helical-start (*N/S*) number transitions: 3.

891

892 **Figure supplement 4A**

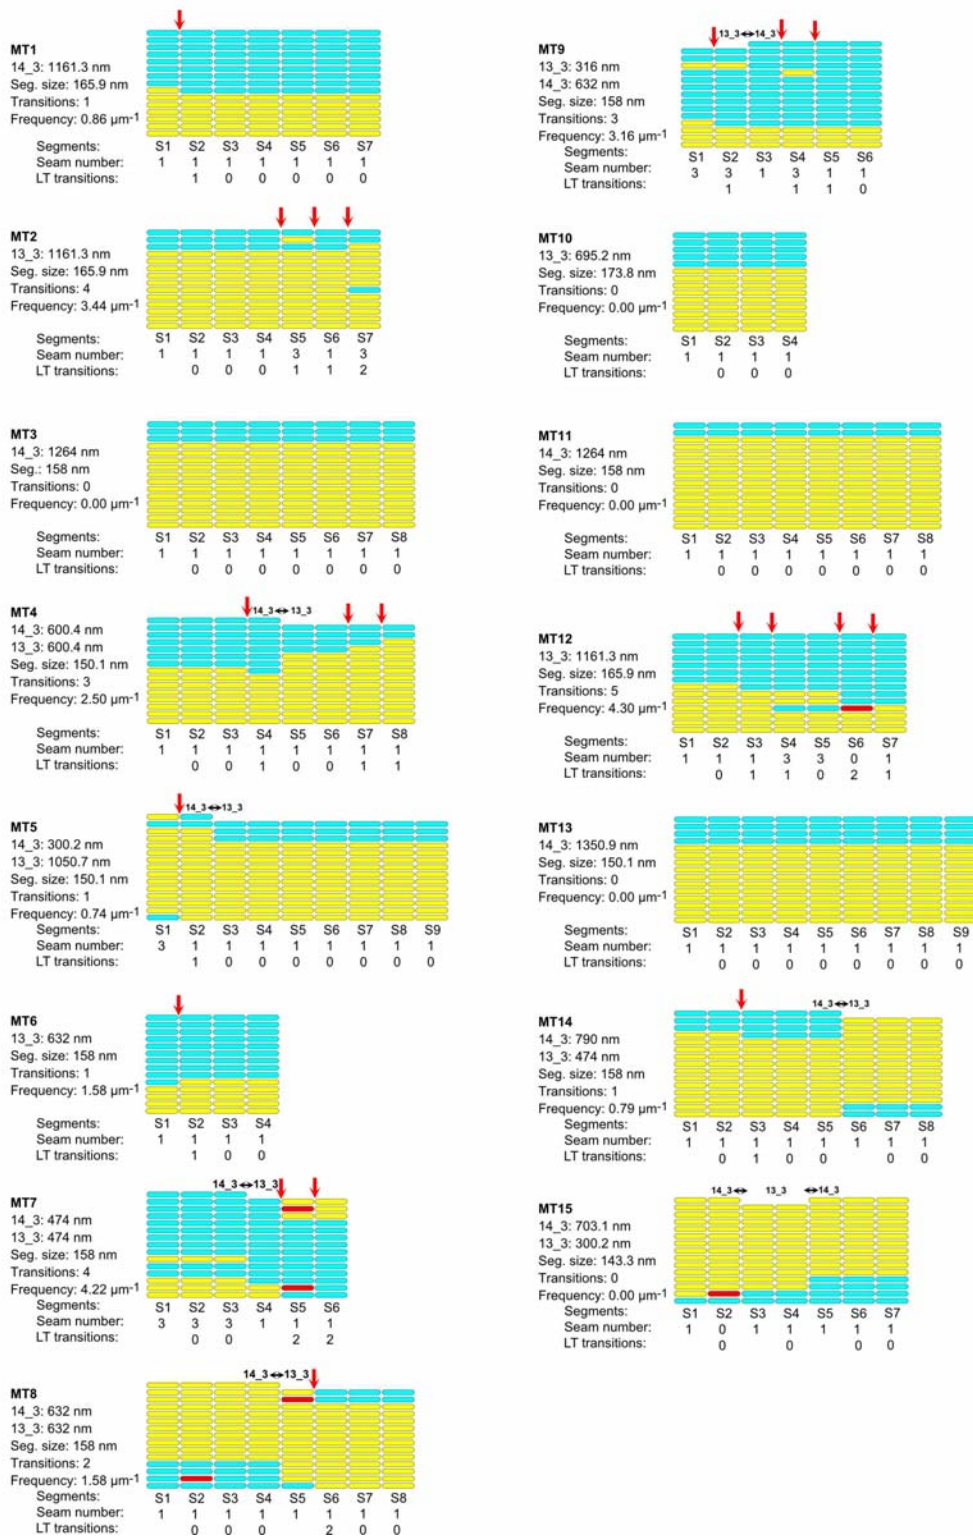

893

894



895 **Figure supplement 4B**

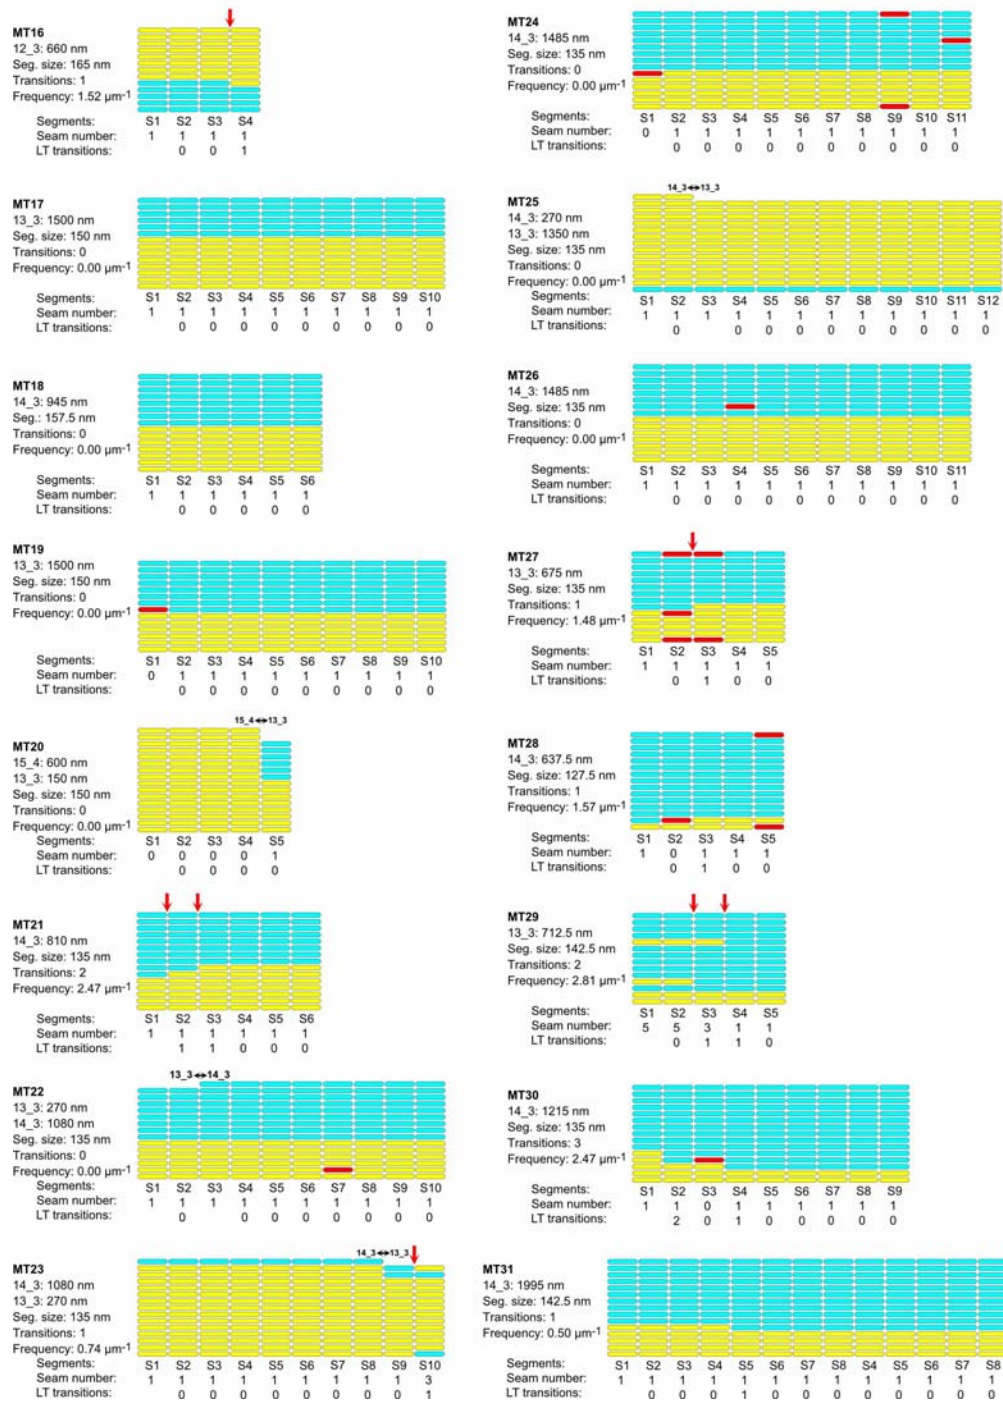

896

897 **Lattice organization of microtubules assembled *in vitro* from purified porcine brain**

898 **tubulin in the presence of GMPCPP**



899 31 microtubules (35.4  $\mu\text{m}$  in total length) were analyzed on 6 tomograms acquired on 2  
900 independent samples. Number of microtubule segments: 239; number of lateral interactions:  
901 3250 (A type: 261, B type: 2951, ND: 38); lattice type (LT) transitions: 37;  
902 protofilament/helical-start (*N/S*) number transitions: 12.  
903

904 **Figure supplement 5A**

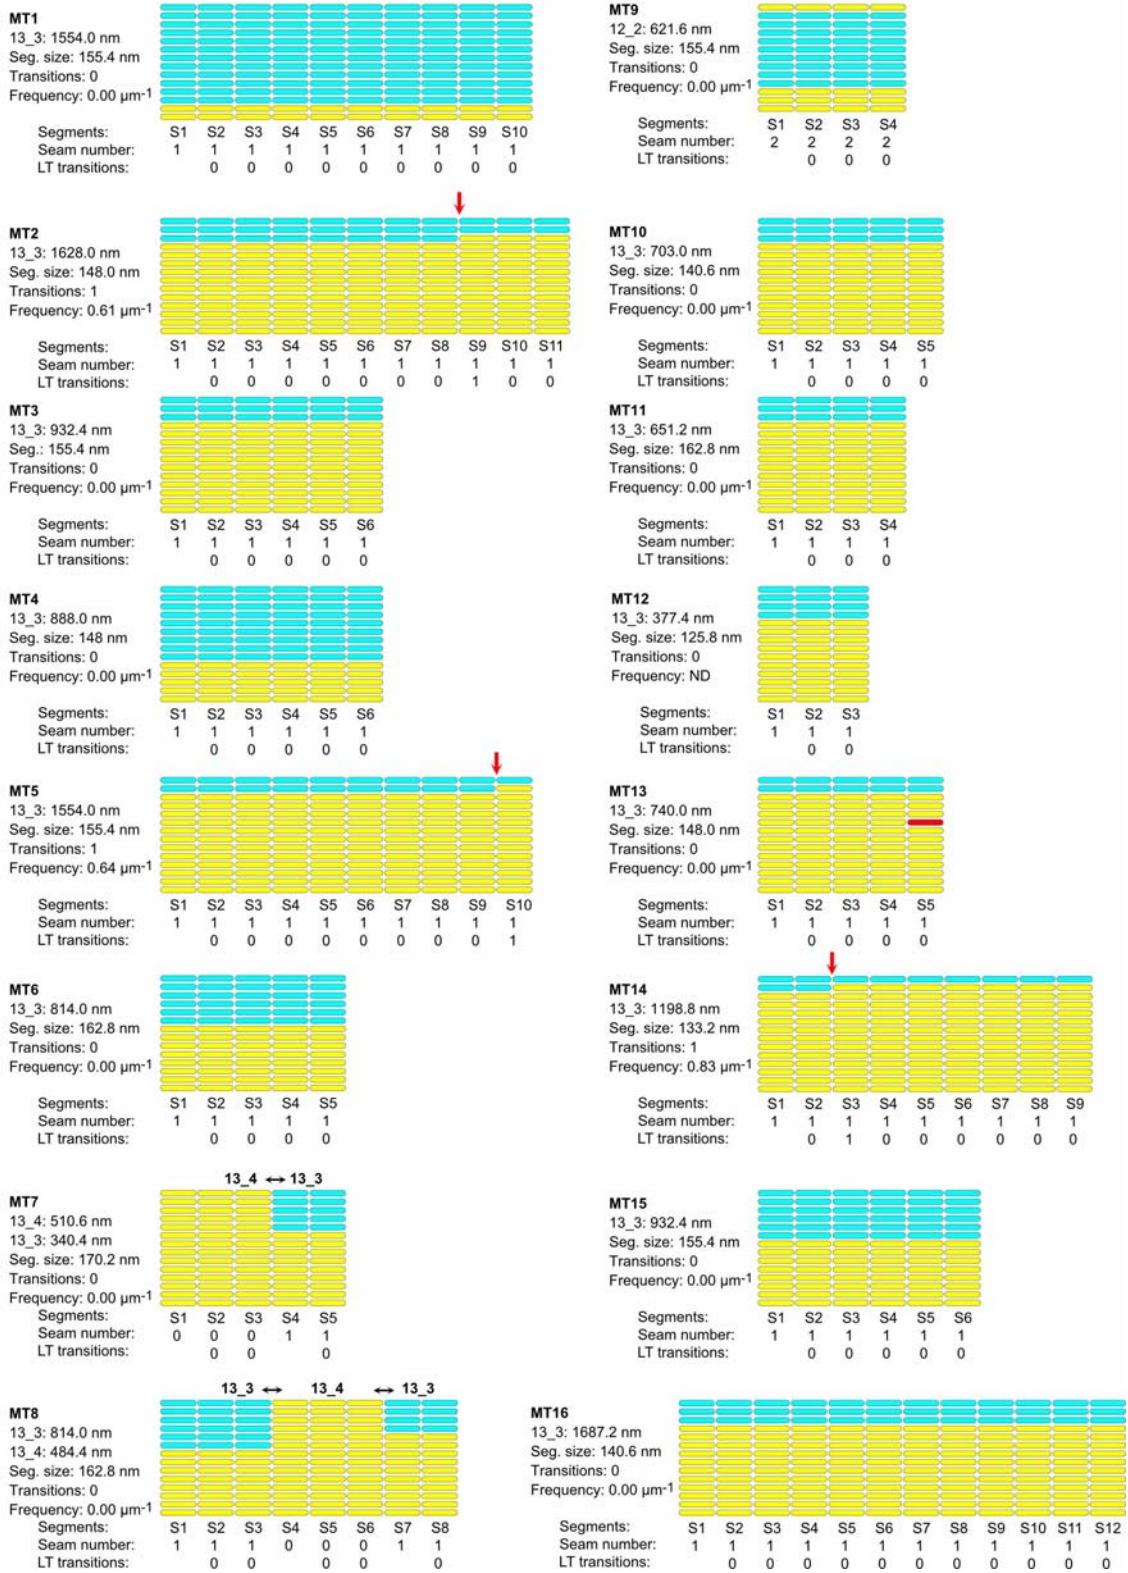

905

906

907 **Figure supplement 5B**

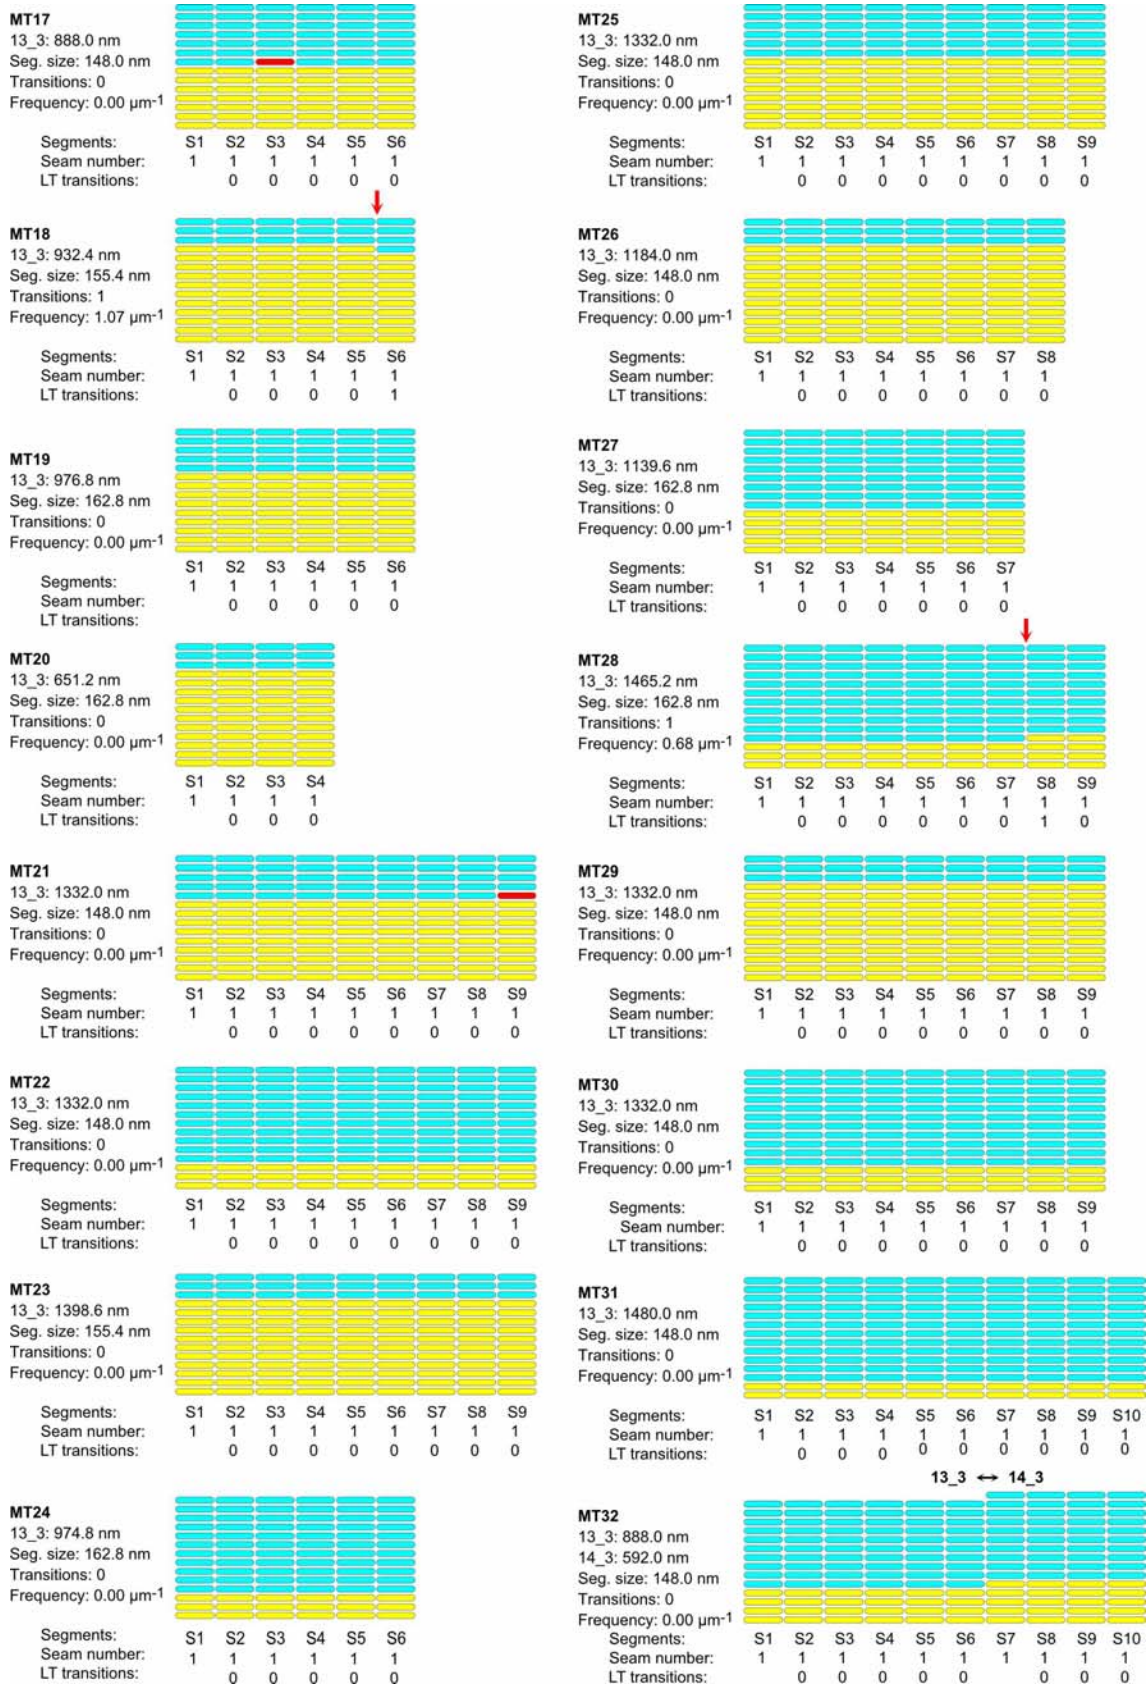



909 **Figure supplement 5C**

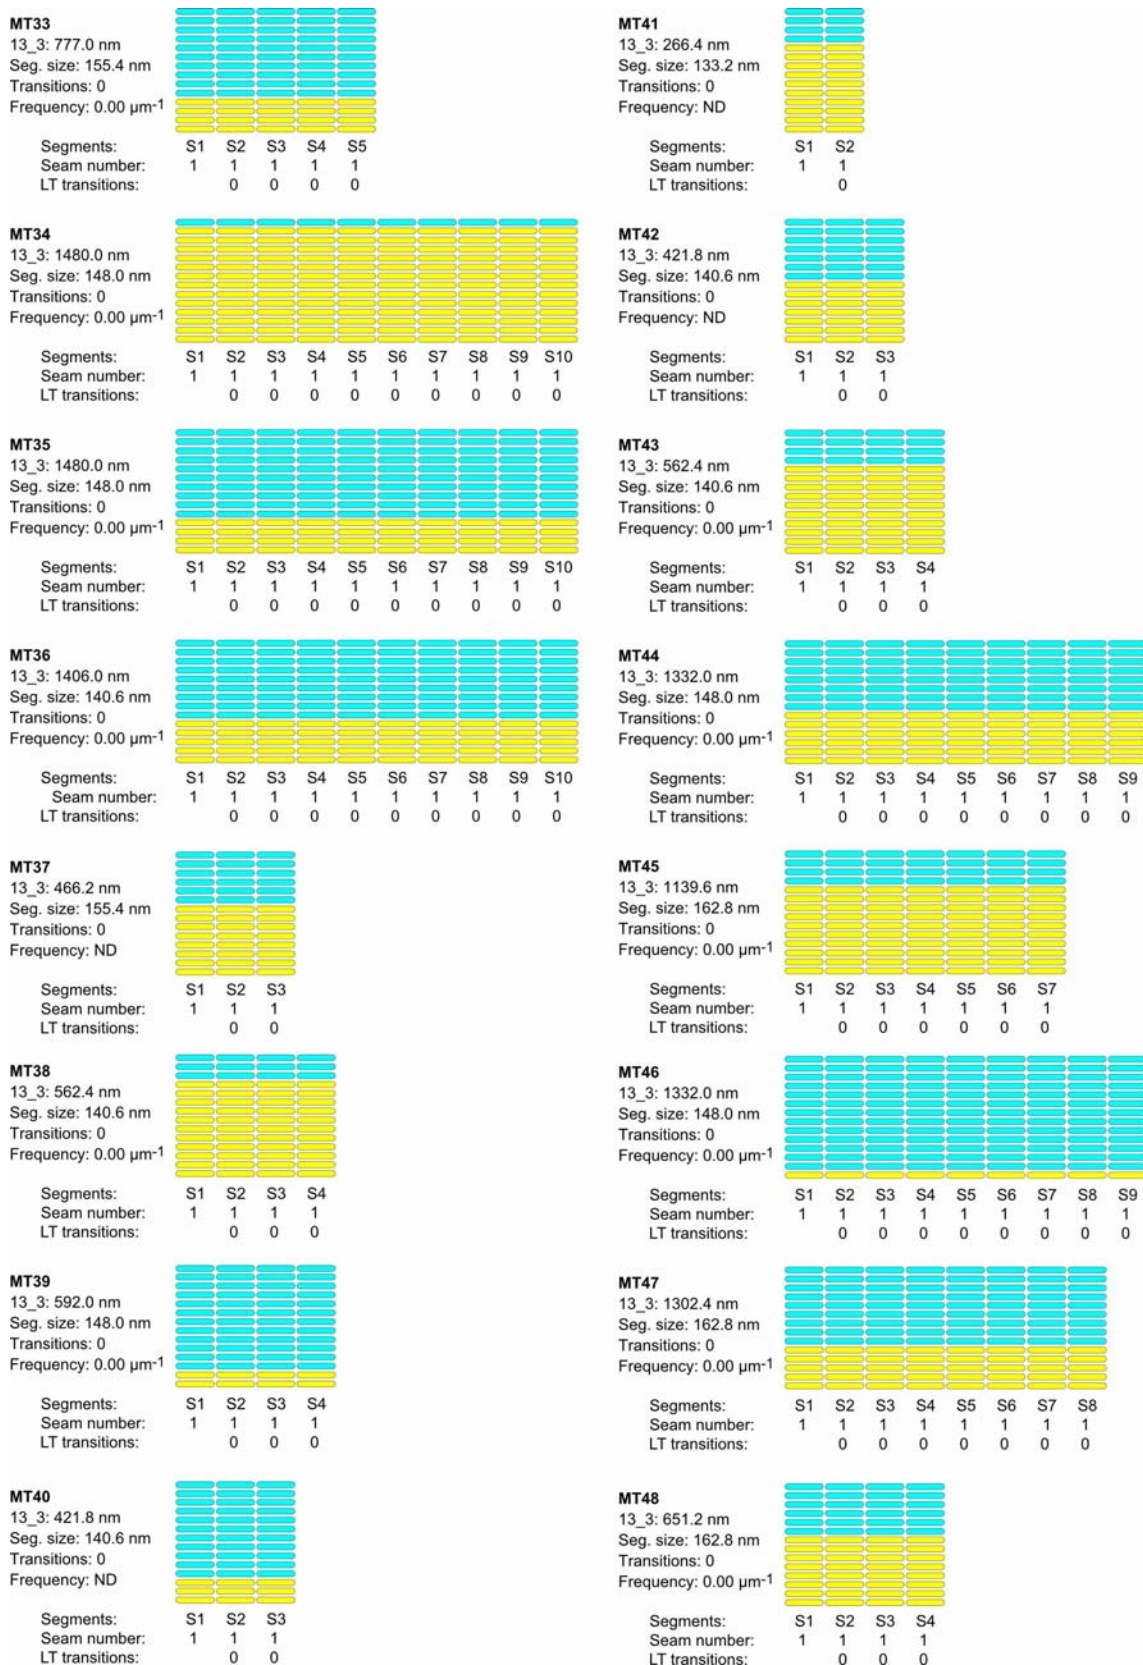

911 **Figure supplement 5D**

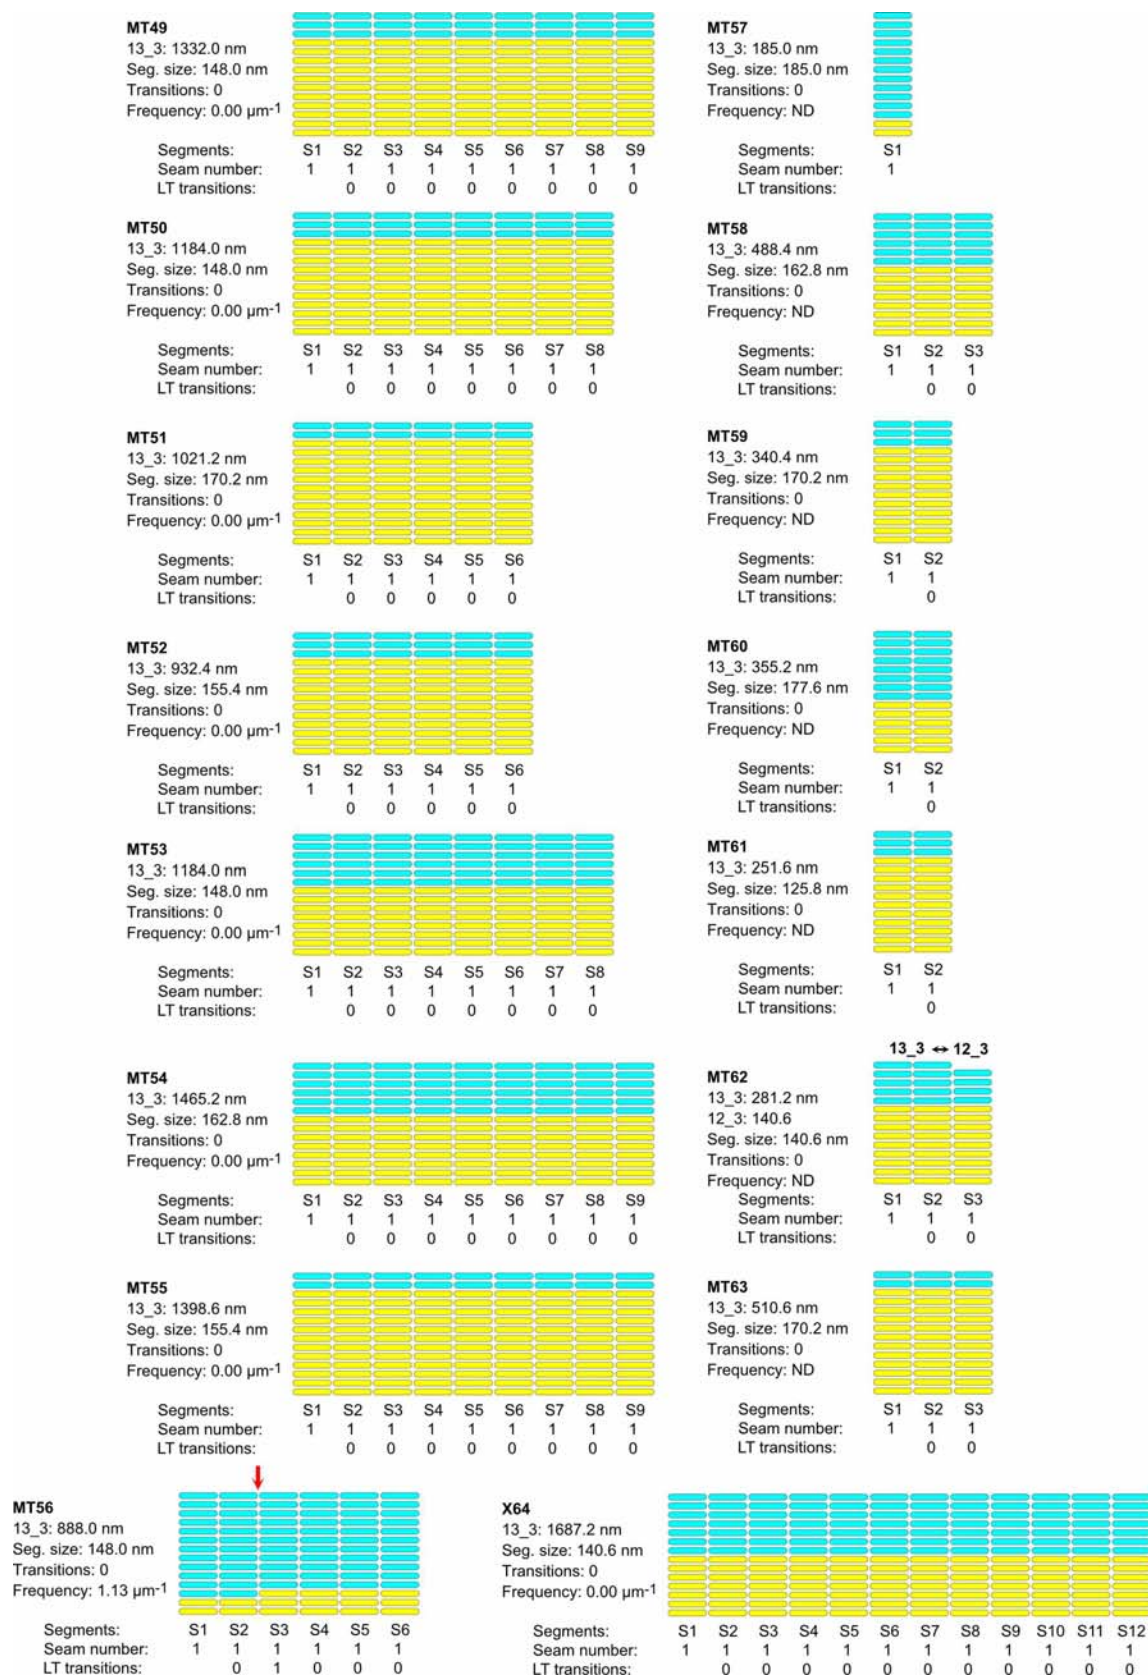

913 **Lattice organization of microtubules assembled in cytoplasmic *Xenopus* egg extracts in**  
914 **the presence of 5% DMSO**

915 64 microtubules (63.5  $\mu\text{m}$  in total length) were analyzed on 5 tomograms acquired on one  
916 sample. Number of microtubule segments: 419; number of lateral interactions: 5446 (A type:  
917 414, B type: 5024, ND: 8); lattice type (LT) transitions: 6; protofilament/helical-start (*N/S*)  
918 number transitions: 5. Red arrows indicate lattice type transitions in MT2, MT5, MT14,  
919 MT18, MT28 and MT56.

920



921 **Figure supplement 6**

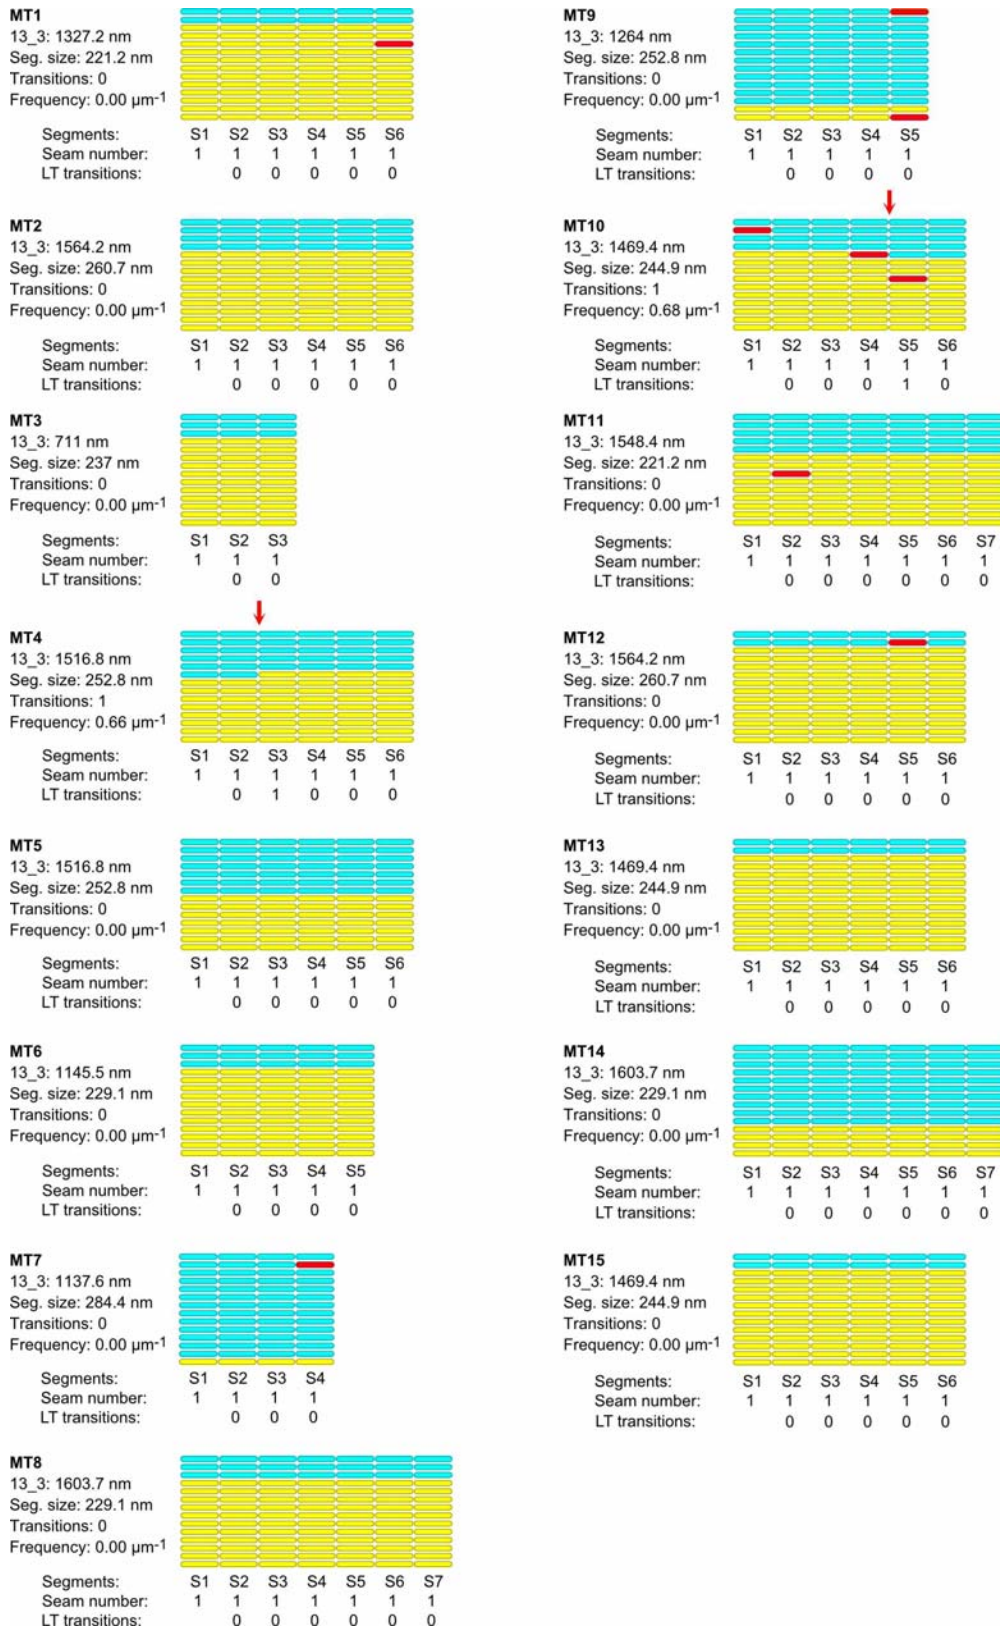

923 **Lattice organization of microtubules assembled in cytoplasmic *Xenopus* egg extracts in**

924 **the presence of RanQ69L**

925 15 microtubules (20.6  $\mu\text{m}$  in total length) were analyzed on 1 tomogram acquired on one

926 sample. Number of microtubule segments: 86; number of lateral interactions: 1118 (A type: 8,

927 B type: 1018, ND: 16); lattice type (LT) transitions: 2. Red arrows indicate lattice type

928 transitions in MT4 and MT10.

929



930 **Supplementary Table 1. Characterization of microtubule lattice structure by cryo-**  
 931 **electron tomography and segmented sub-tomogram averaging**

932

| Assembly conditions              | GTP             | GMPCPP          | <i>Xenopus</i><br>DMSO | <i>Xenopus</i><br>RanQ69L |
|----------------------------------|-----------------|-----------------|------------------------|---------------------------|
| Tomograms                        | 4               | 6               | 5                      | 1                         |
| Samples                          | 2               | 2               | 1                      | 1                         |
| Microtubules                     | 24              | 31              | 64                     | 15                        |
| Total length ( $\mu\text{m}$ )   | 31.7            | 35.4            | 63.5                   | 20.6                      |
| Segments                         | 195             | 239             | 419                    | 86                        |
| Lateral interactions             | 2664            | 3250            | 5446                   | 1118                      |
| A-type                           | 461             | 261             | 414                    | 8                         |
| B-type                           | 2091            | 2951            | 5024                   | 1018                      |
| ND                               | 112             | 38              | 8                      | 6                         |
| Lattice-type transitions         | 119             | 37              | 6                      | 2                         |
| Frequency ( $\mu\text{m}^{-1}$ ) | $3.69 \pm 4.20$ | $1.24 \pm 1.41$ | $0.10 \pm 0.28$        | $0.13 \pm 0.09$           |

933

934

935 **Supplementary Table 2. Protofilament (N) and helix-start number (S)**

| N_S                     | 12_3 | 13_3  | 13_4 | 14_3  | 15_3 | 15_4 |
|-------------------------|------|-------|------|-------|------|------|
| GTP (%)                 | 0.99 | 33.07 | -    | 64.89 | 1.05 | -    |
| GMPCPP (%)              | 1.87 | 39.38 | -    | 57.06 | -    | 1.70 |
| <i>Xen.</i> DMSO (%)    | 1.16 | 96.30 | 1.59 | 0.95  | -    | -    |
| <i>Xen.</i> RanQ69L (%) | -    | 100   | -    | -     | -    | -    |

936 *Xen.*: *Xenopus*

937 **Supplementary videos**

938 **Figure 2 - Video 1. Dual-axis cryo-electron tomography of microtubules.** Microtubule  
939 visualized in cross-section in the single- and dual-axis regions of a cryo-electron tomogram.

940 Related to Figure 2 - figure supplement 1C.

941

942 **Figure 2 - Video 2. Sub-tomogram average of a 14\_3 mono-seam microtubule.** Yellow  
943 spheres are placed on kinesin-motor domain densities and cyan spheres in between along one  
944 turn of the 3-start helix.

945

946 **Figure 3 - Video 3. SSTA of a 13\_3 multi-seam microtubule.** Sub-tomogram average of the  
947 13\_3 microtubule in Figure 3A (full volume), followed by SSTA of the microtubule in 4  
948 segments of 331.8 nm in length (Figure 3B). Red spheres are placed onto aberrant  
949 protofilaments.

950

951 **Figure 7 - Video 4. Cytoplasmic extract microtubules decorated with kinesin-motor**  
952 **domains.** Slices through a cryo-electron tomogram of *Xenopus* egg cytoplasm showing  
953 microtubules decorated with kinesin-motor domains.

954

955 **Figure 8 - Video 5. SSTA of a 13\_3 microtubule assembled in a cytoplasmic extract.**

956 SSTA of the 13\_3 microtubule in Figure 8A in 310.8 nm long segments (S3-S5, Figure 8A,  
957 *top*), and 148.0 nm long segments (S7-S10, Figure 8A, *bottom*).

958

959 **Figure 9 - Video 6. Sub-tomogram averages of microtubules with different**

960 **protofilament and/or helix-start numbers.** Sub-tomogram averages of the 12\_2, 12\_3,

961 13\_4, 14\_3 microtubules in Figure 9. Arrows point to local dislocations in the 12\_2 and 13\_4  
962 microtubules.

963

964 **Figure 10 - Video 7. Microtubule growth-induced mechanism of lattice heterogeneity.**

965 This video depicts how holes of an odd or even number of subunits arise during microtubule  
966 polymerization, with the formation of lateral interactions without longitudinal ones at the tip  
967 of the growing microtubule.

968

**A**

Protofilament

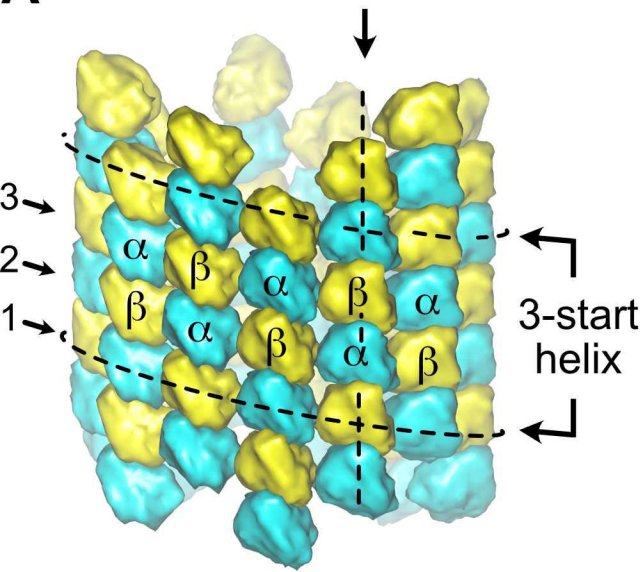**B**

Seam

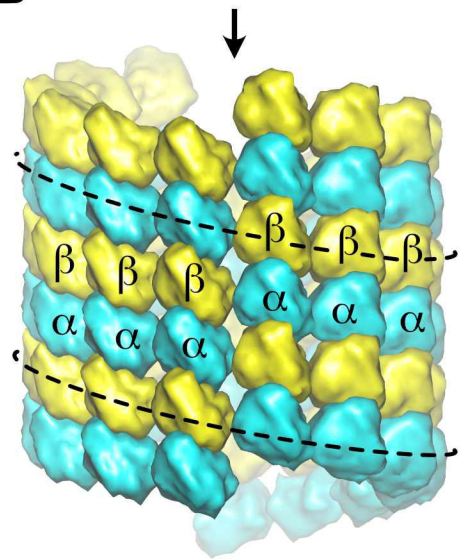**C**

Kinesin-motor domain

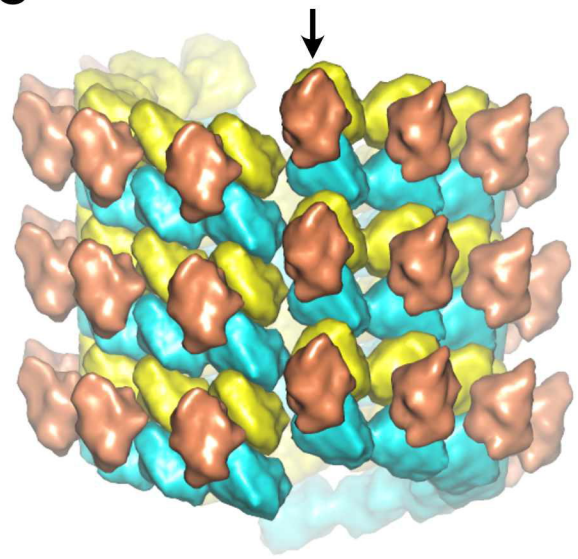

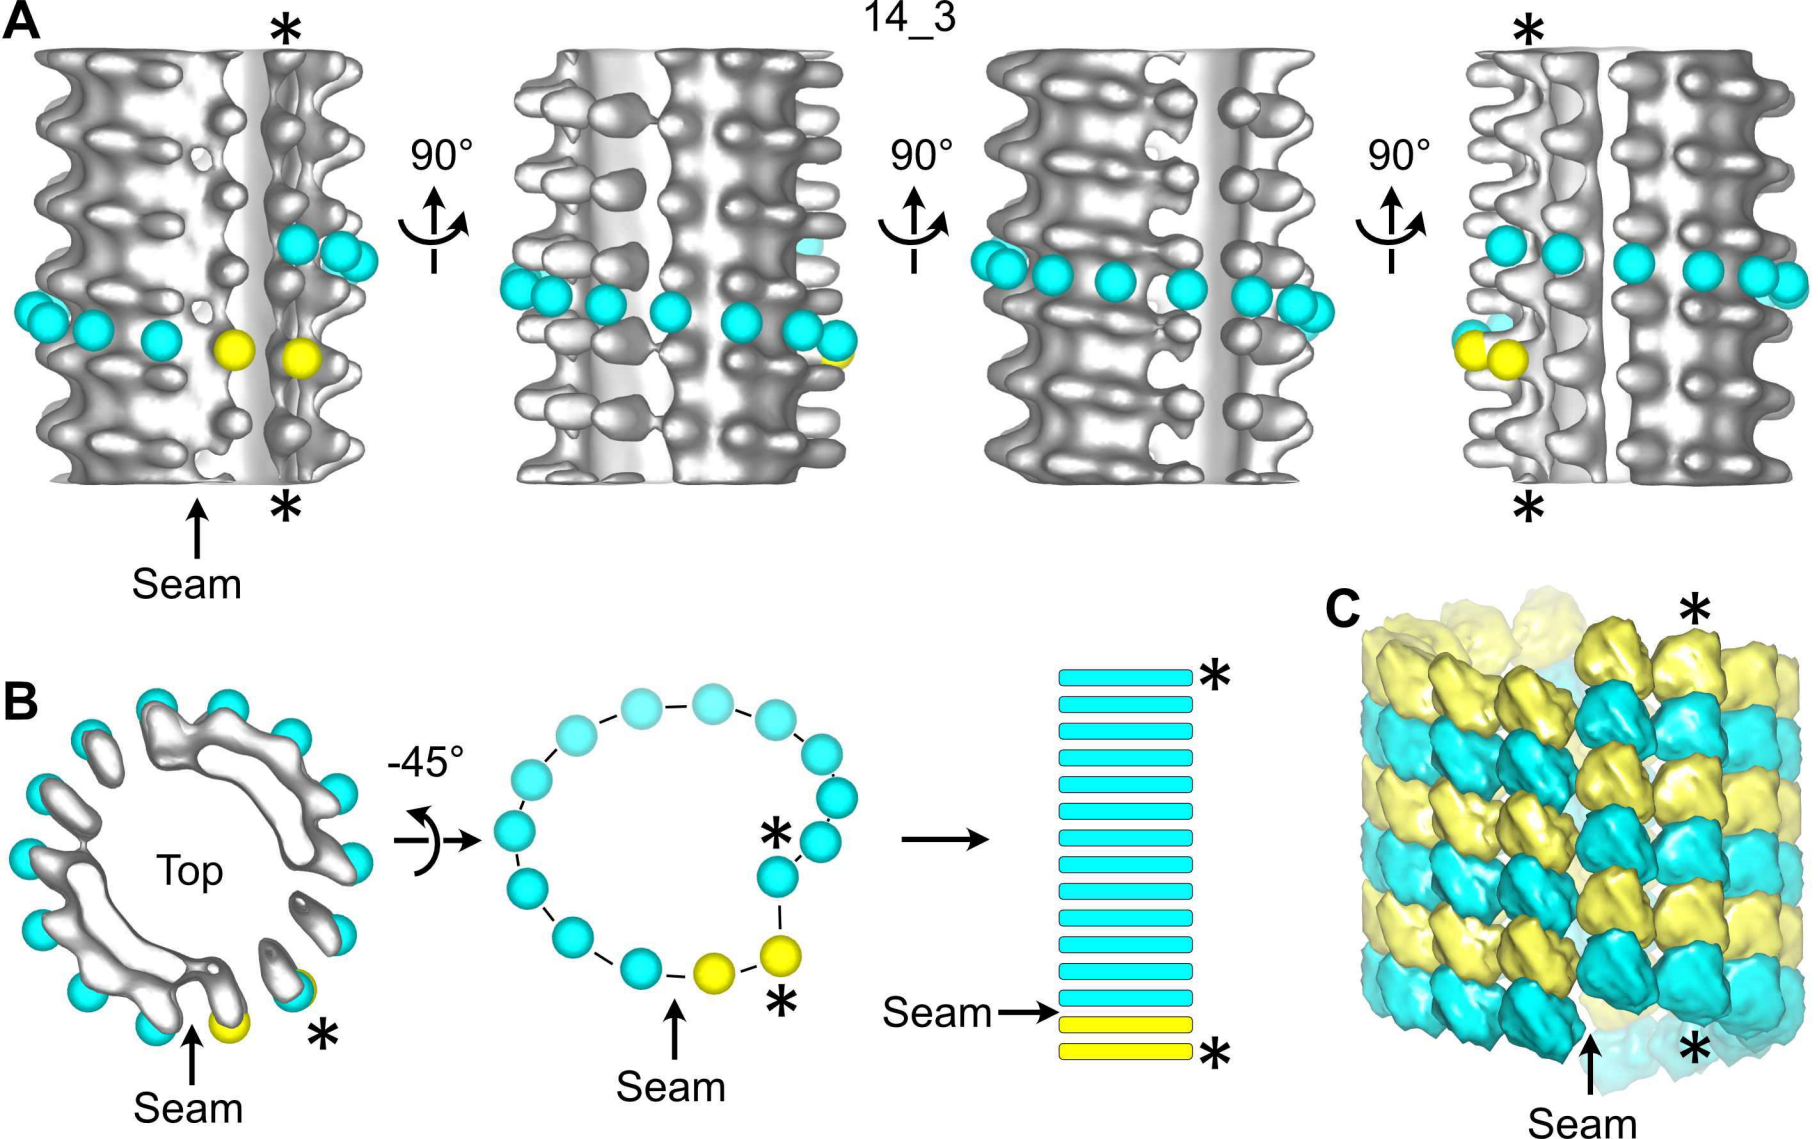





**A**

SSTA

S2 filtered

S3

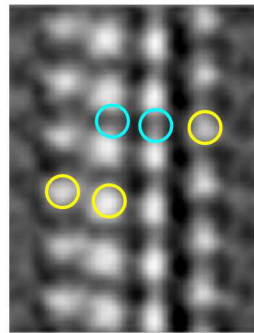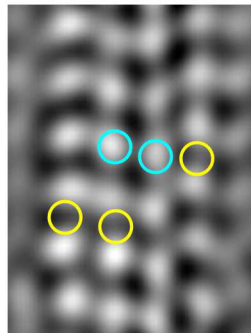

S2

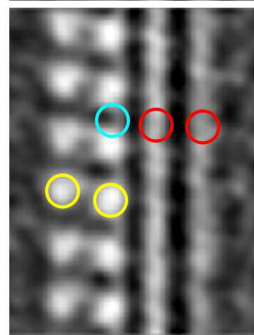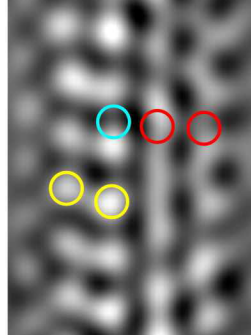

S1

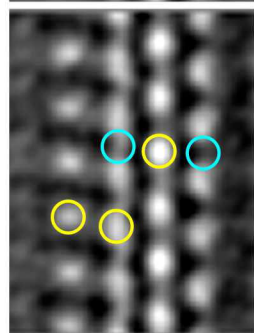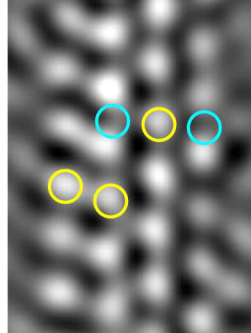

1 2 3 4

1 2 3 4

**B** Registered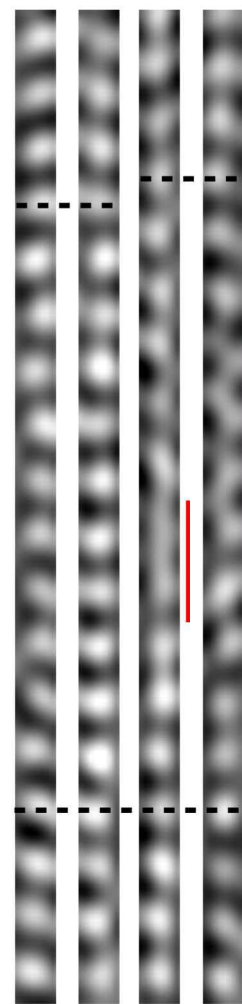

1 2 3 4

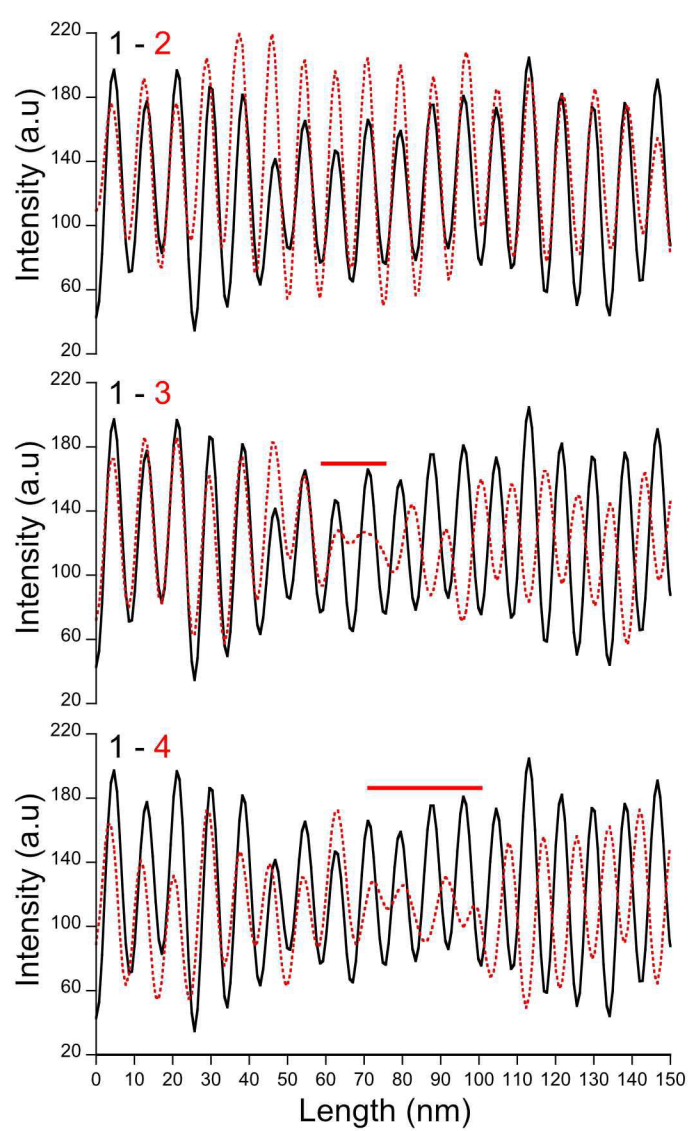**C**

S3

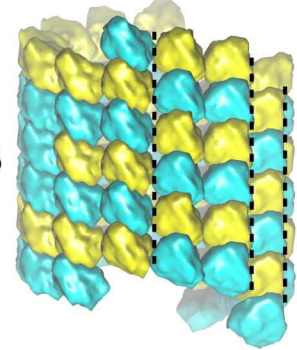

S2

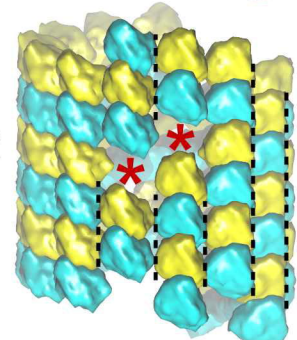

S1

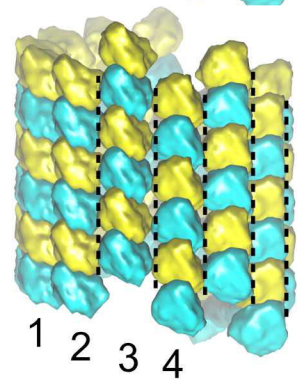

1 2 3 4



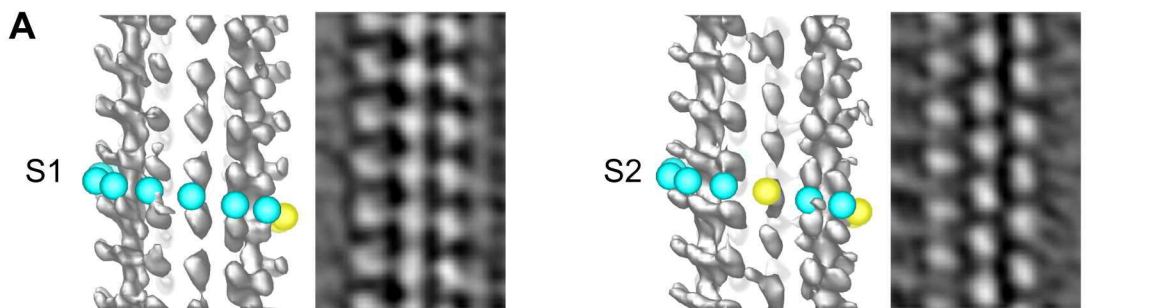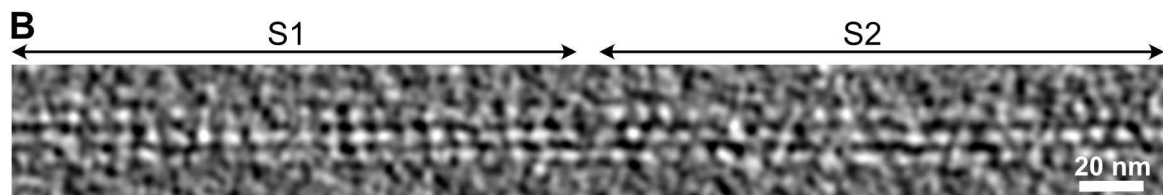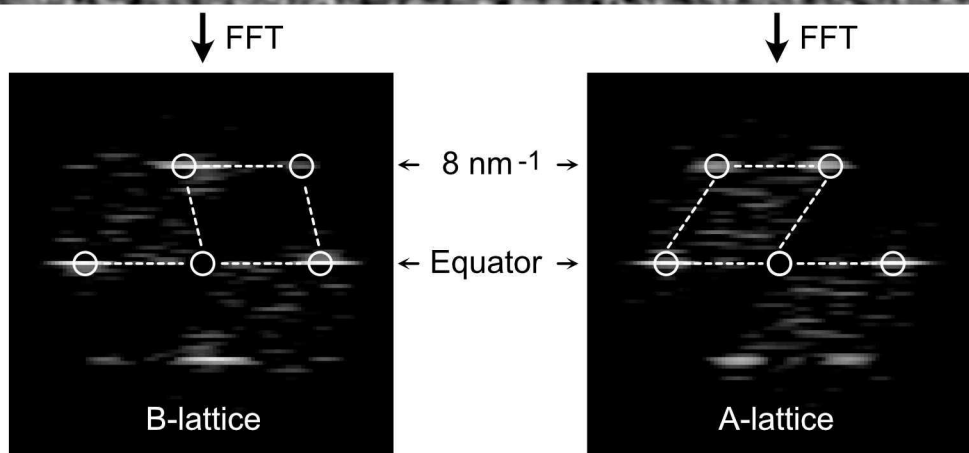

Filtered ↓ FFT<sup>-1</sup>

Filtered ↓ FFT<sup>-1</sup>

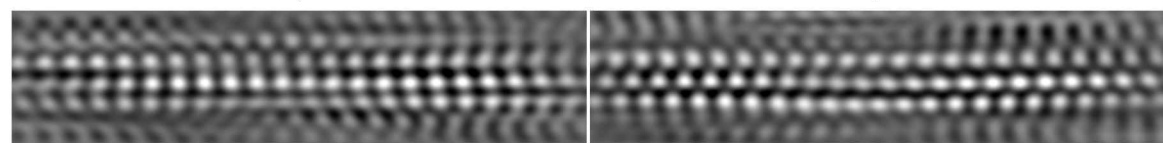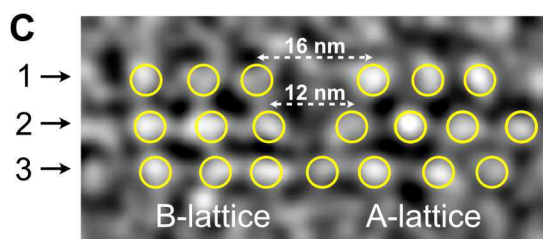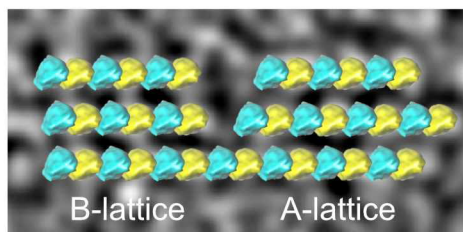



**A**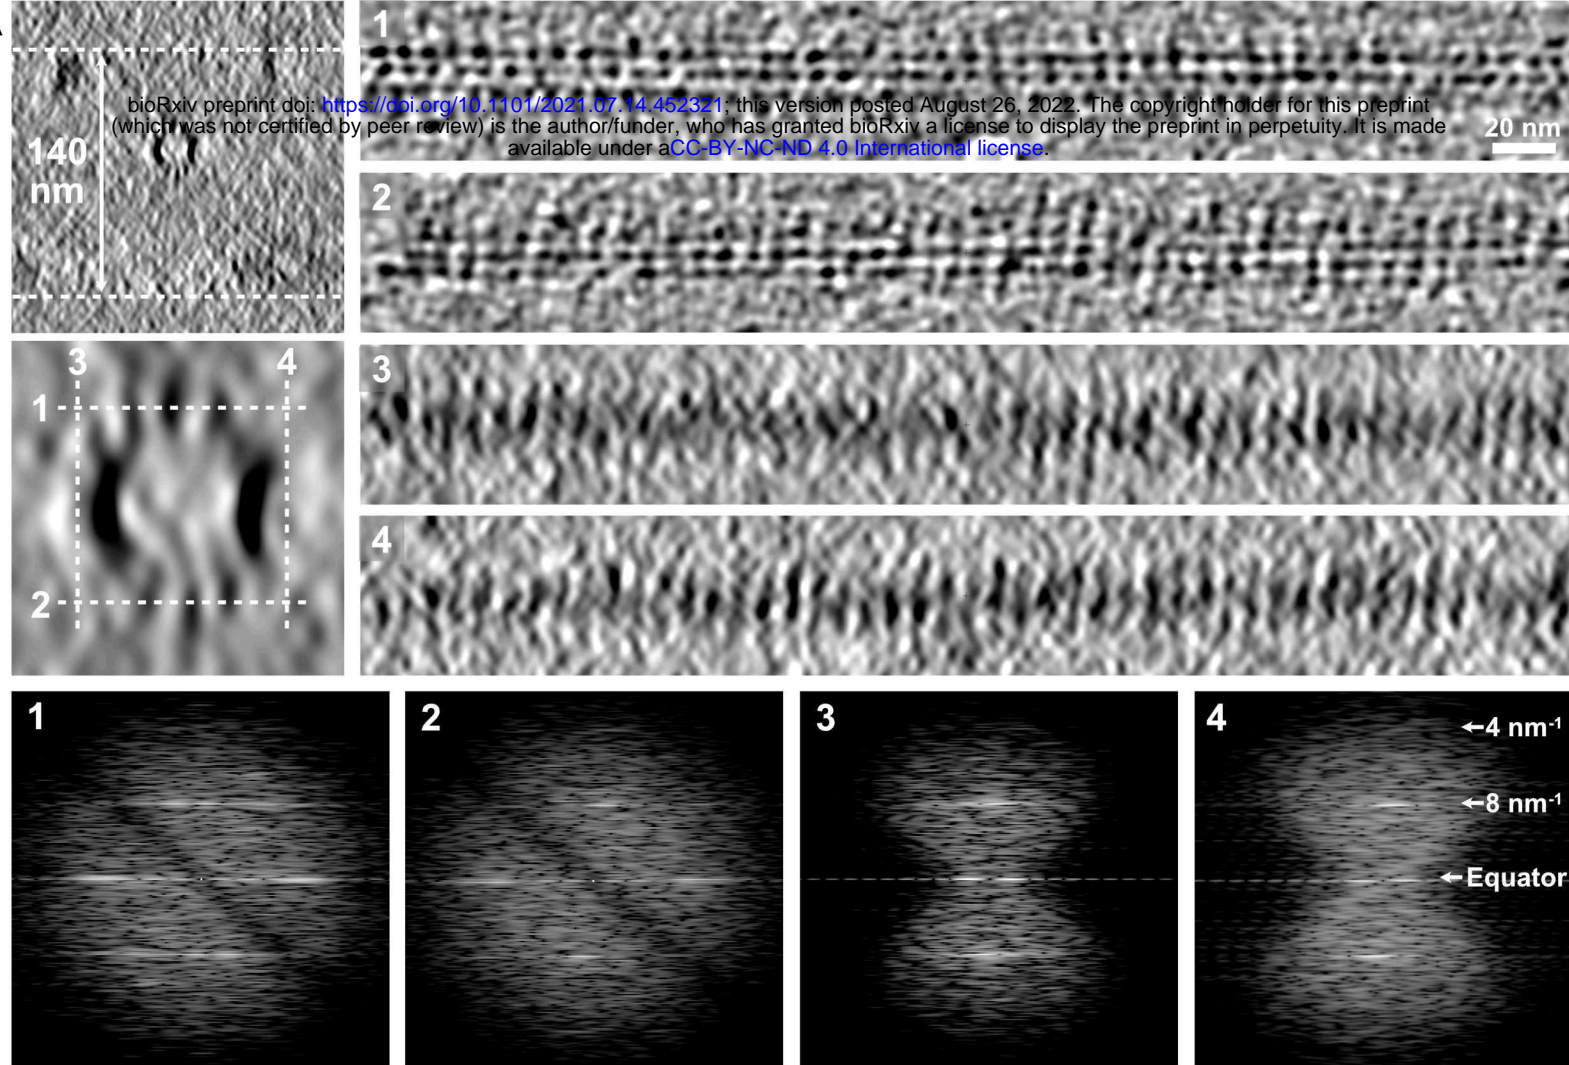**B**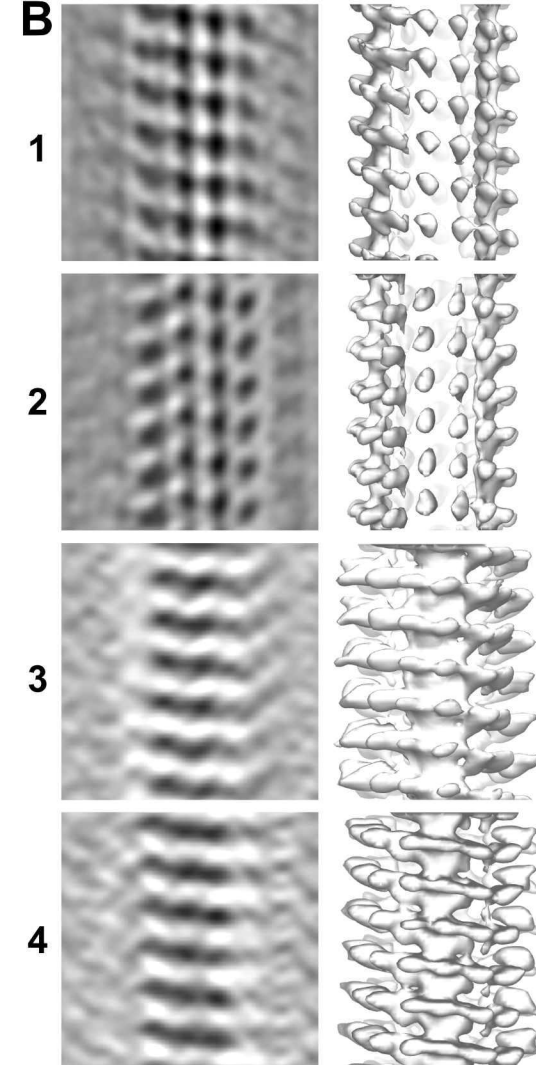**C**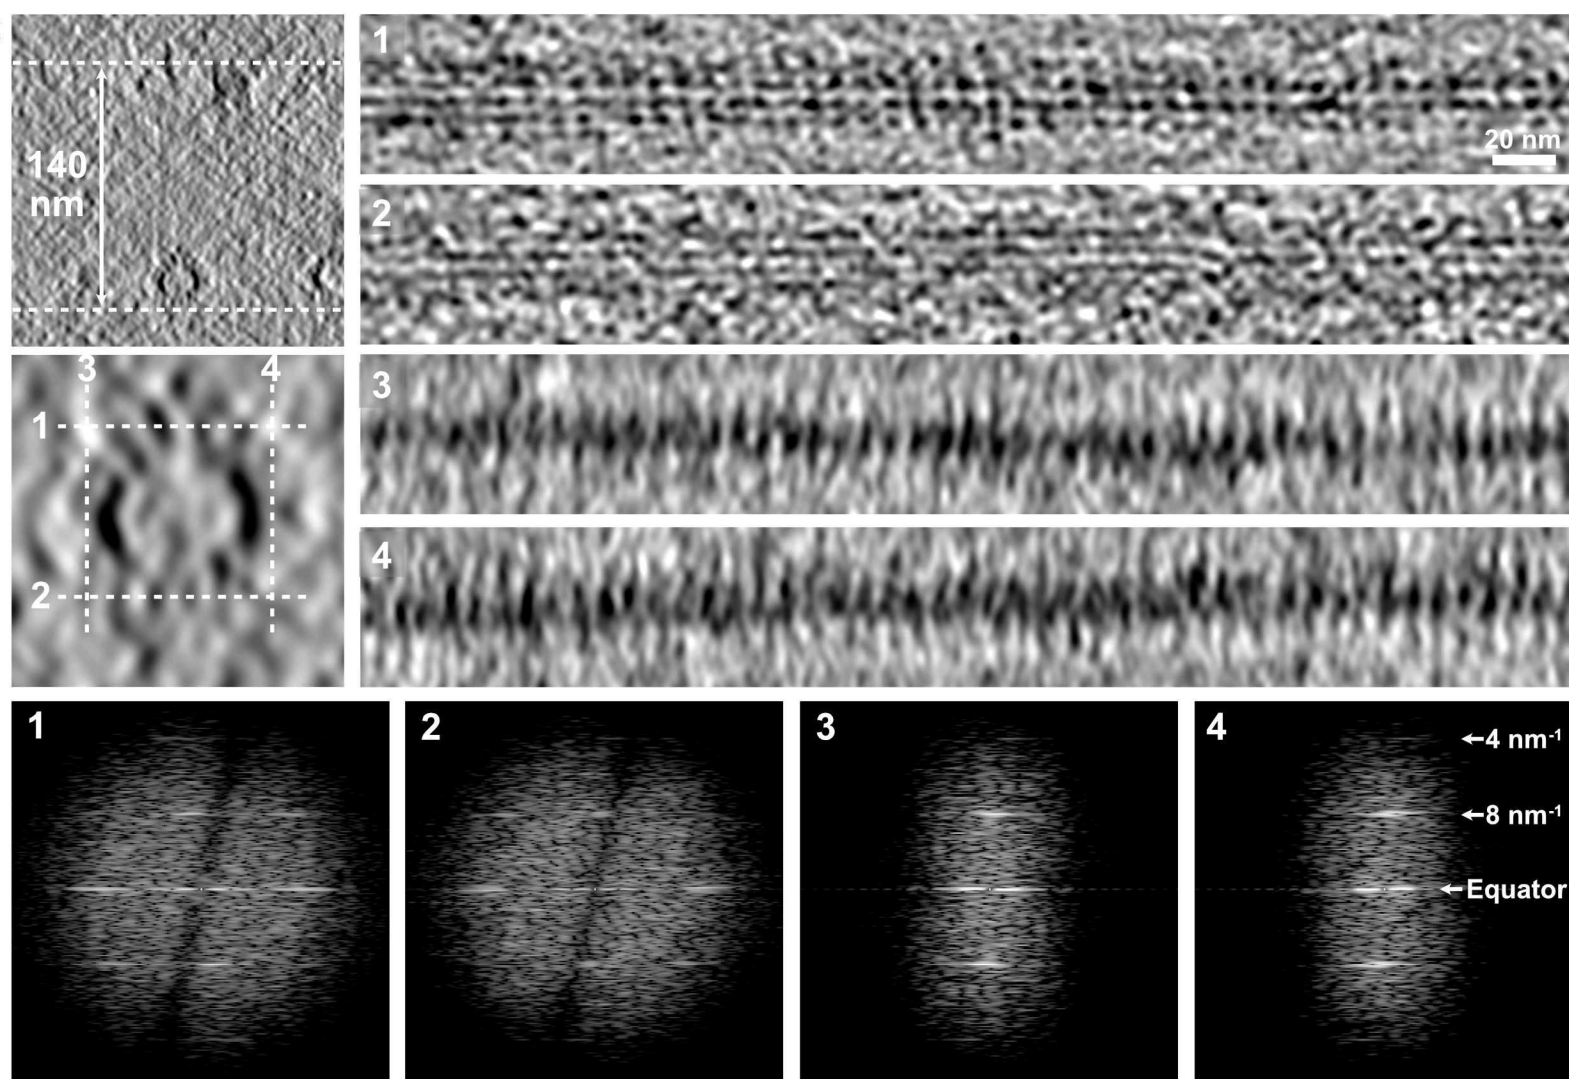**D**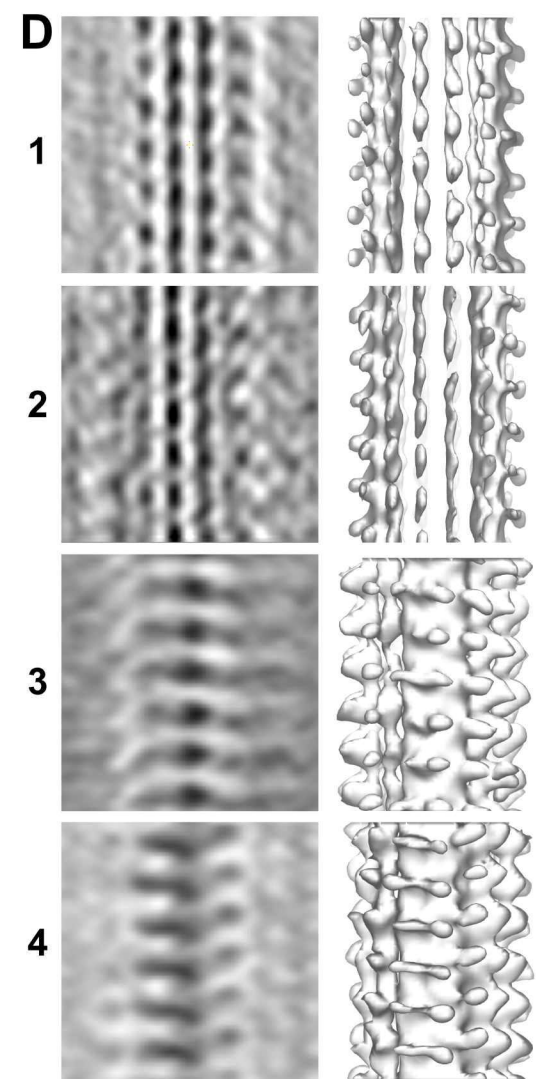



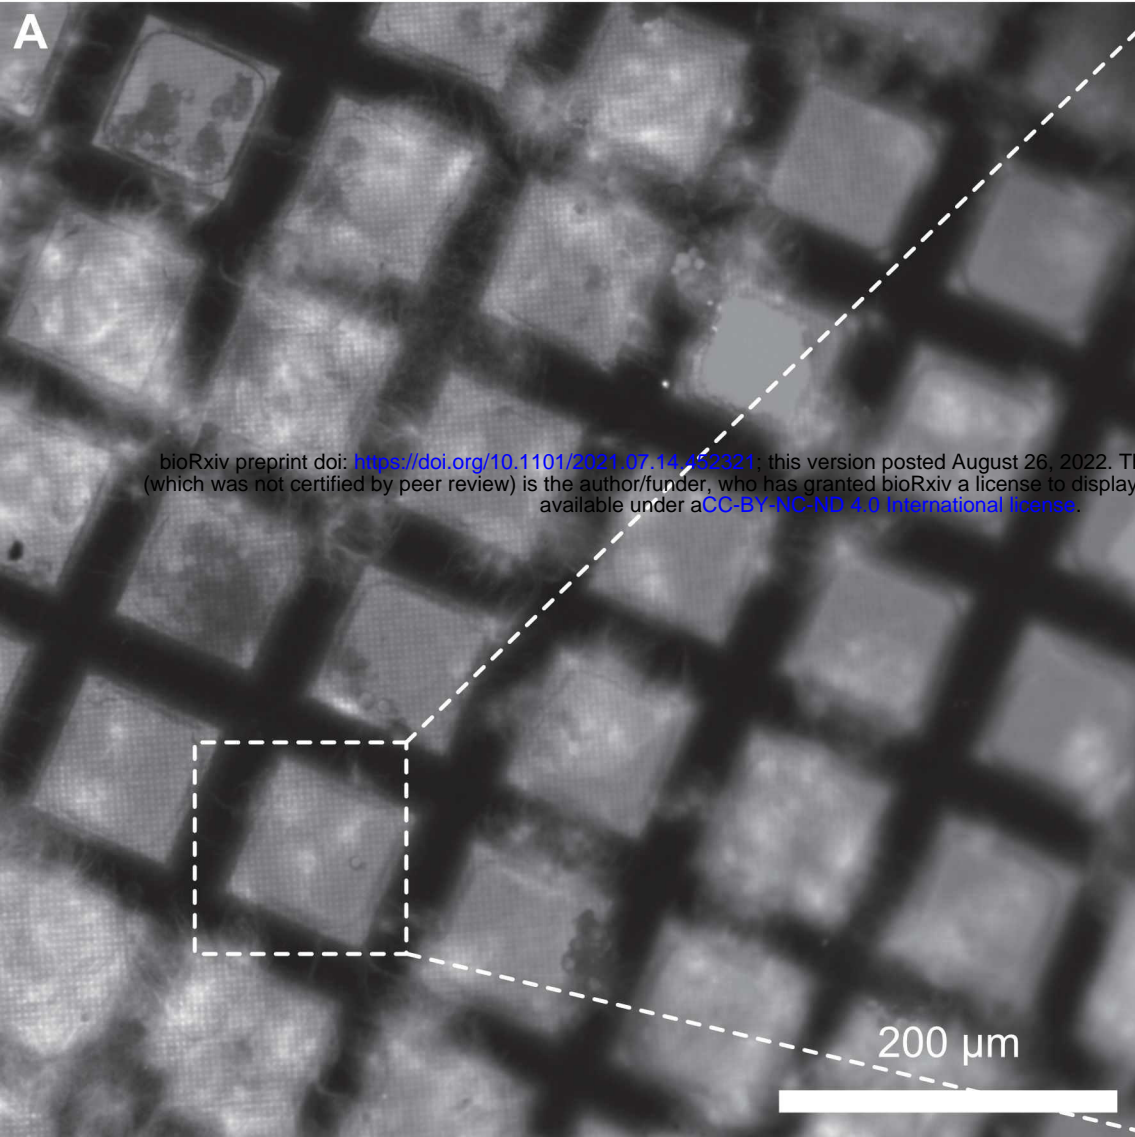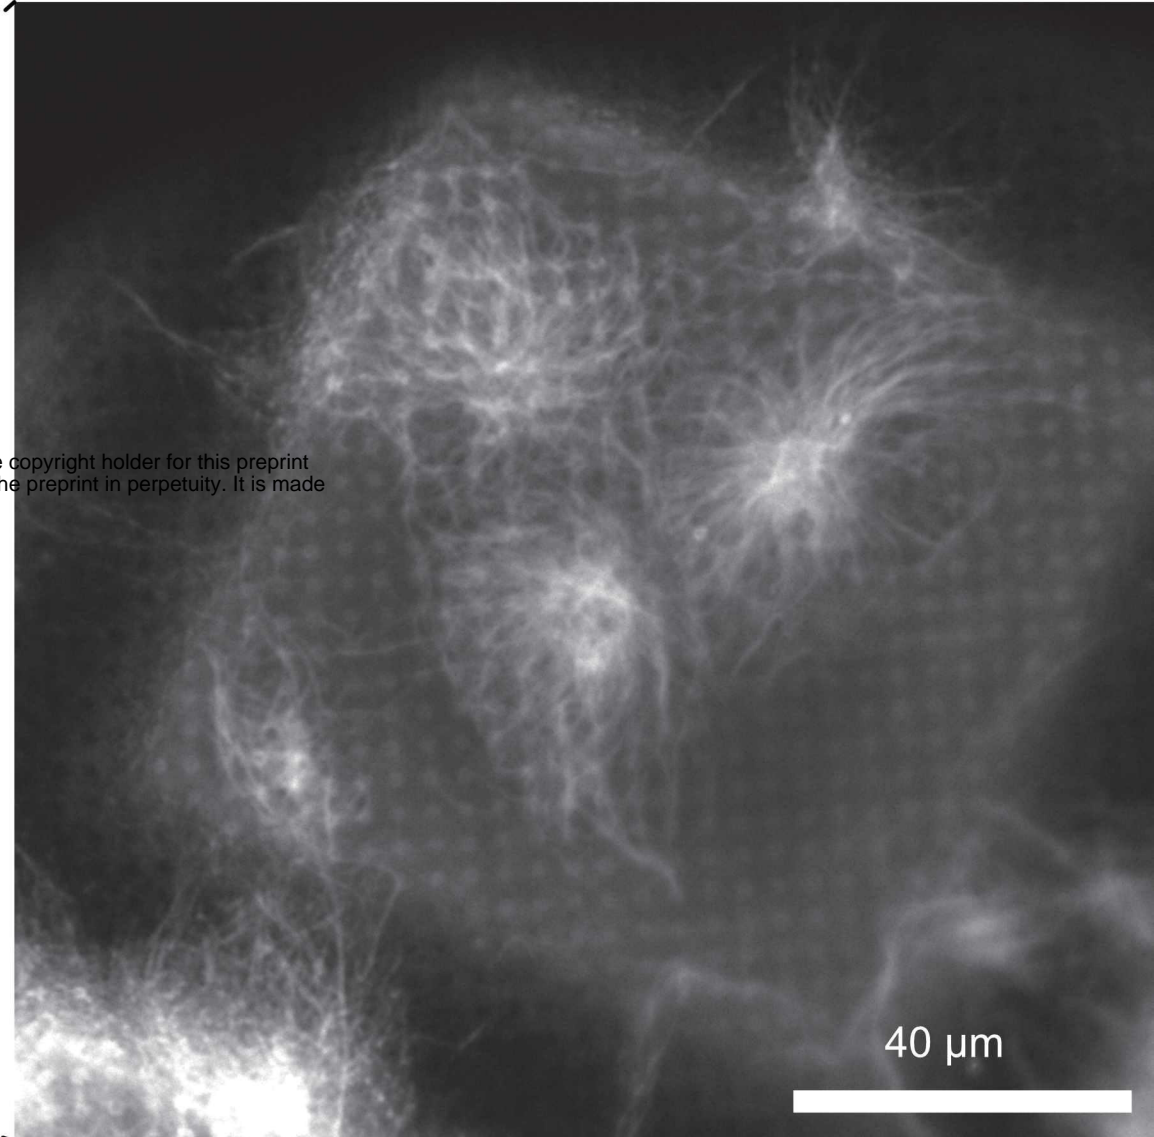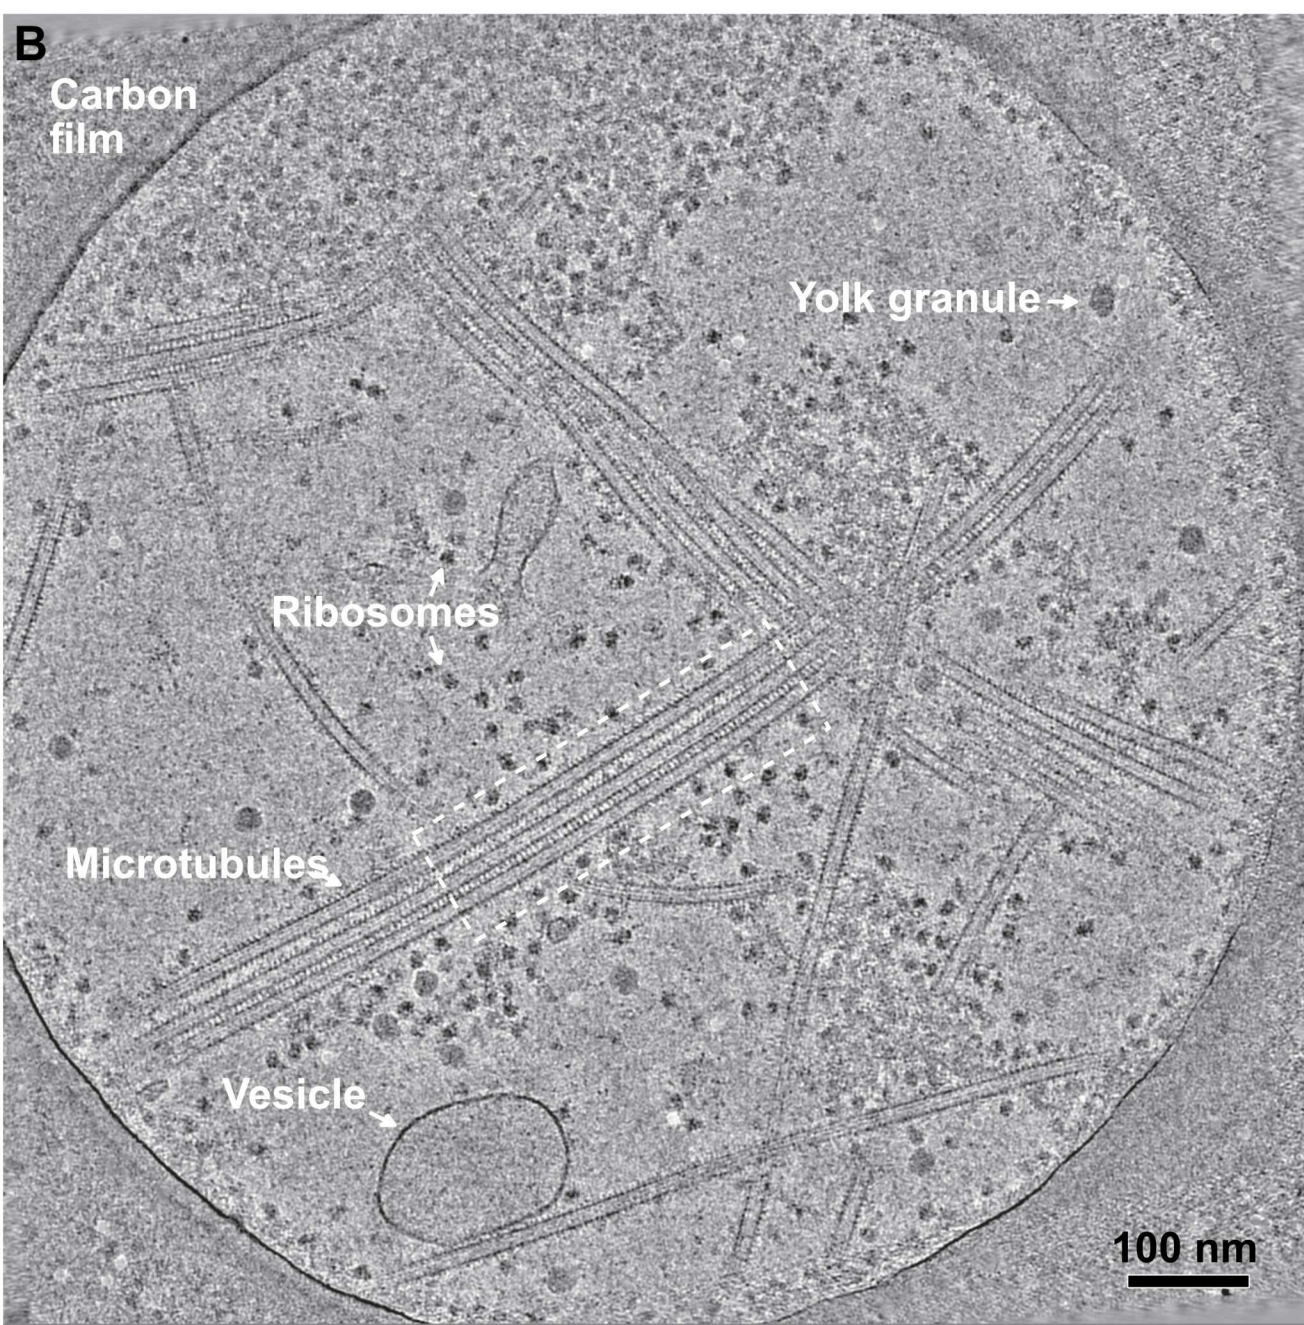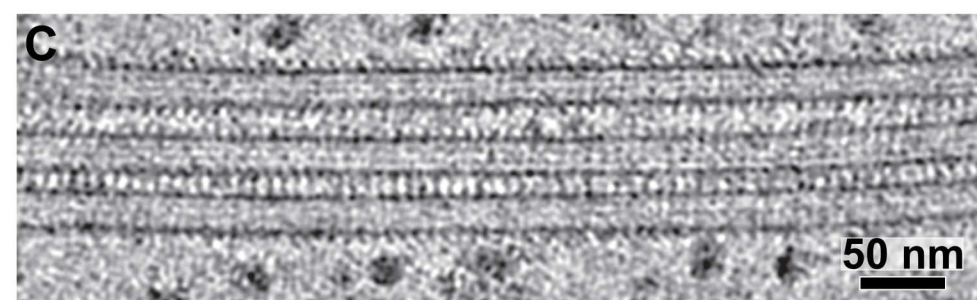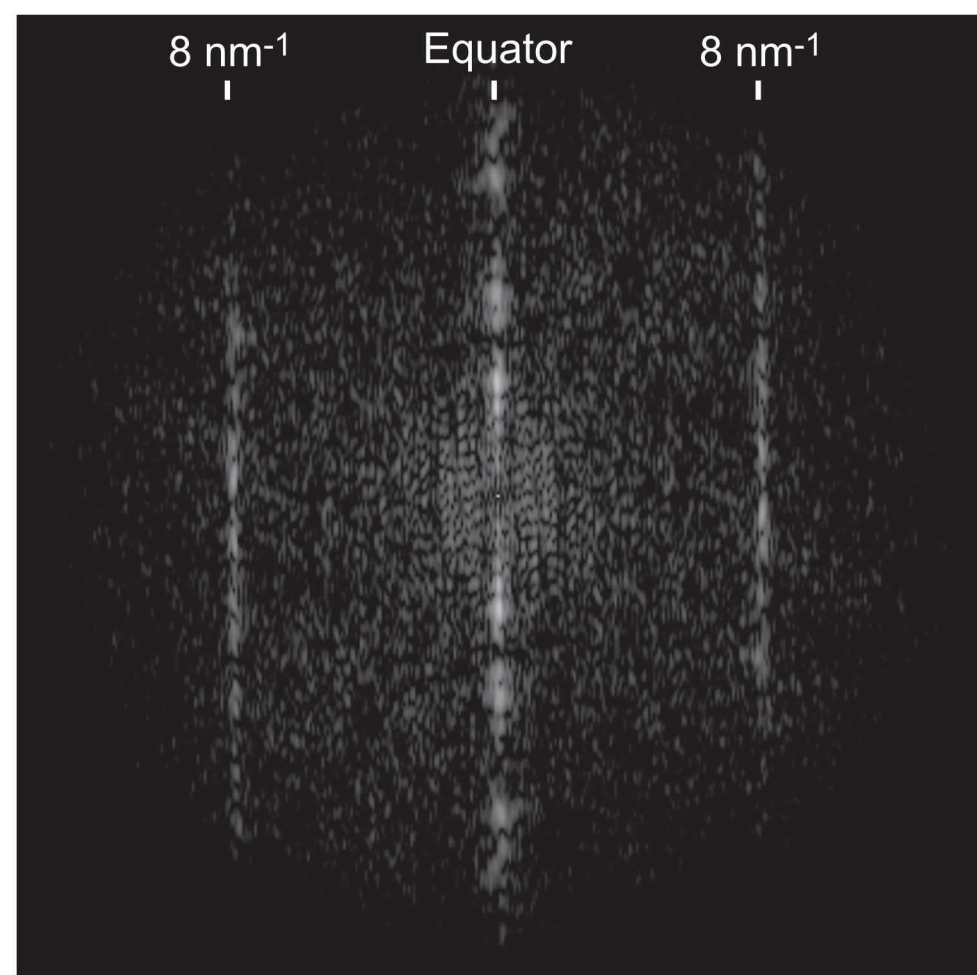



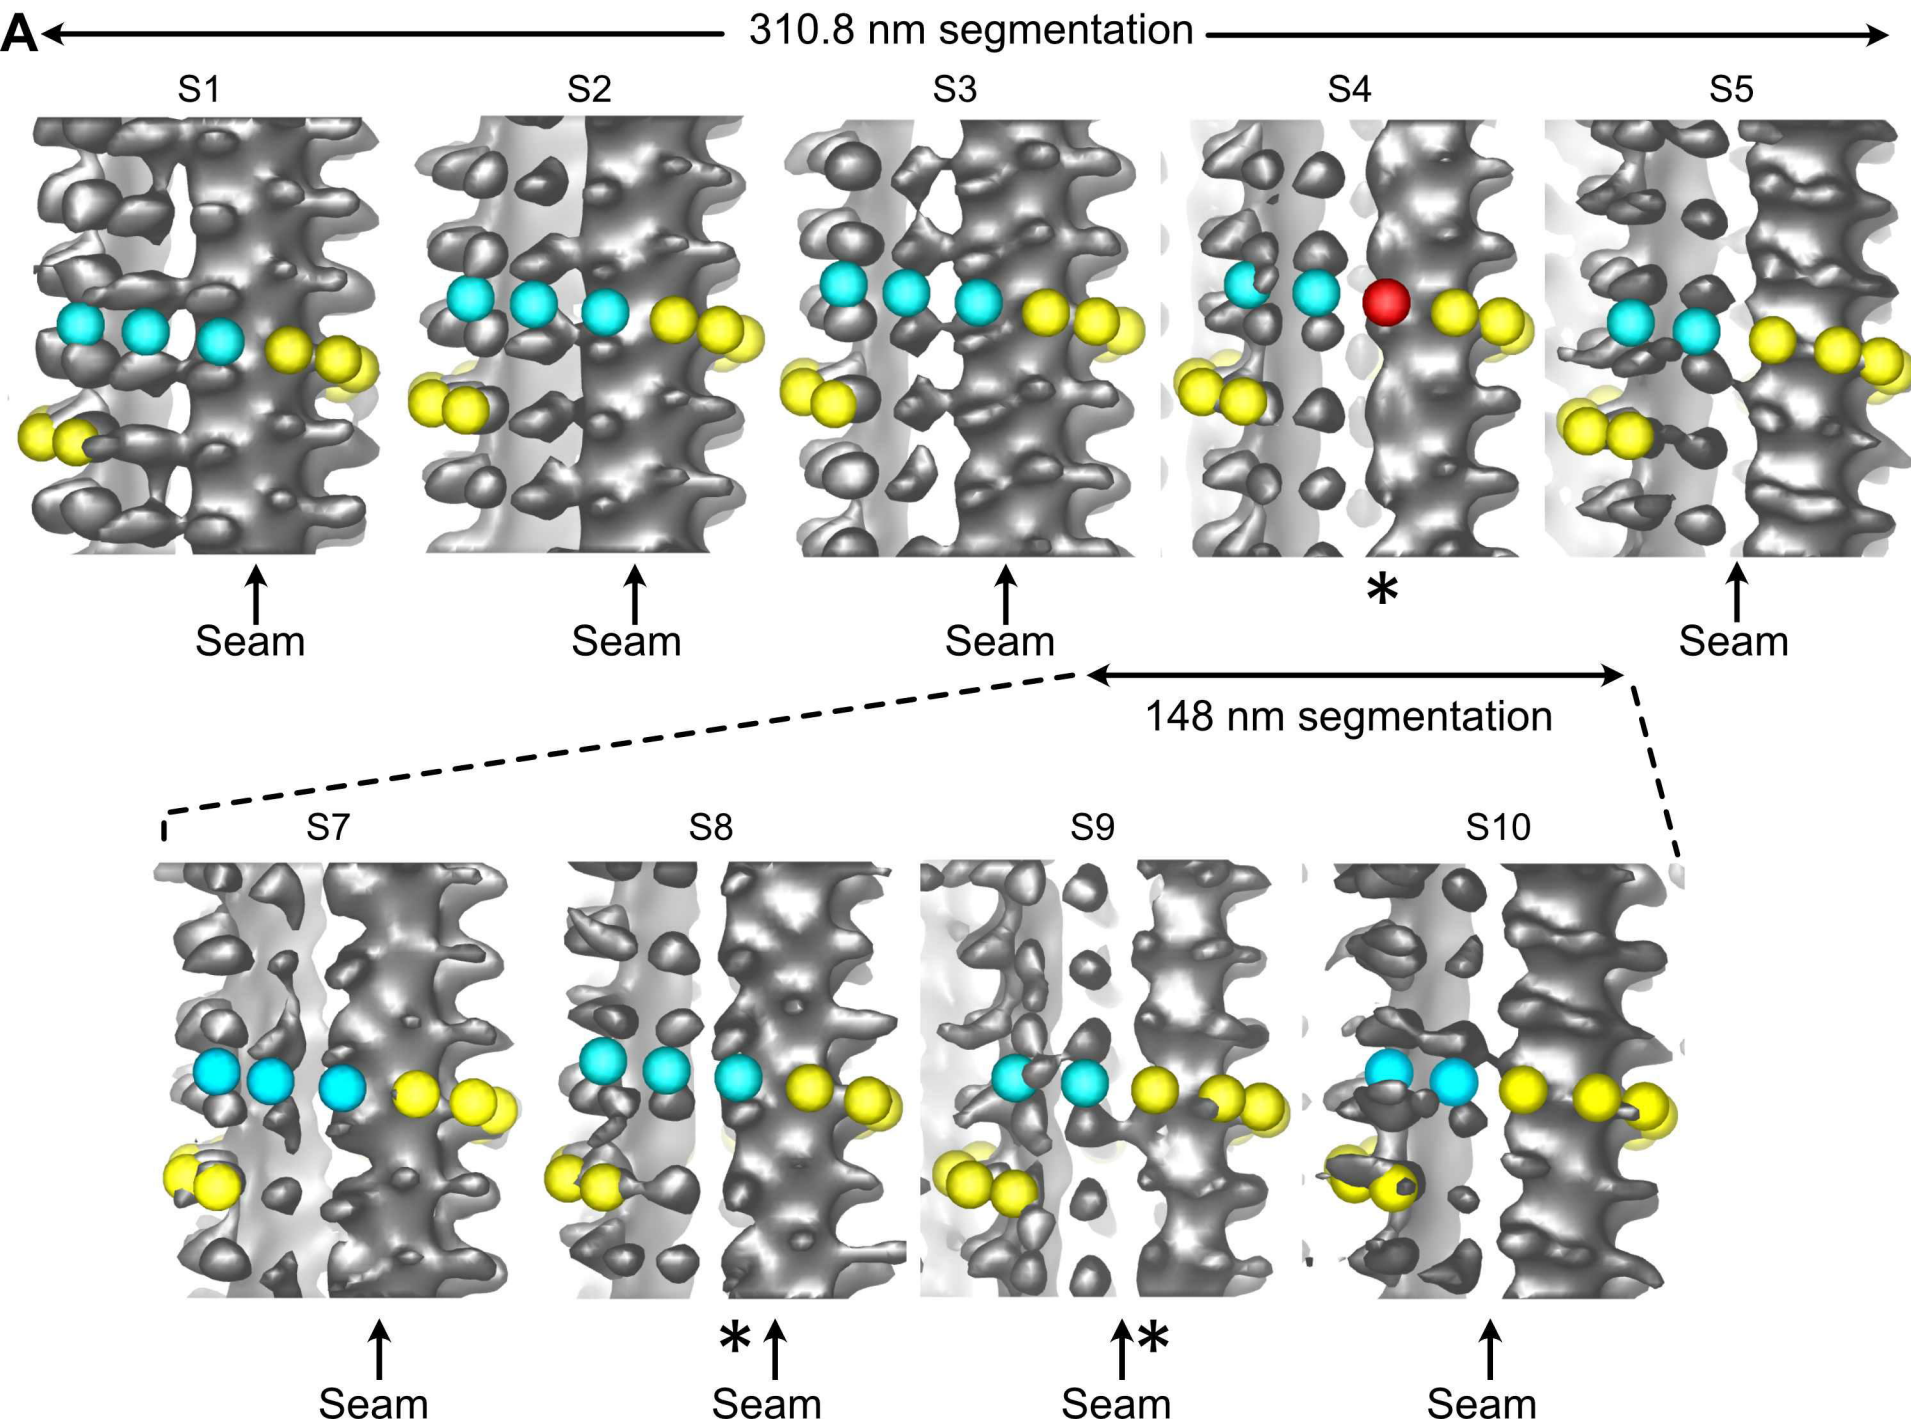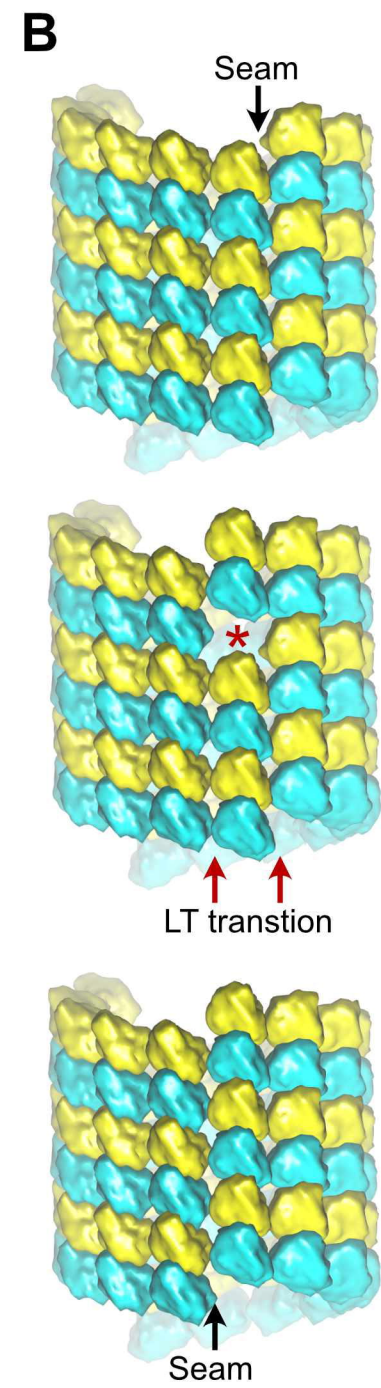

**A**

12\_2

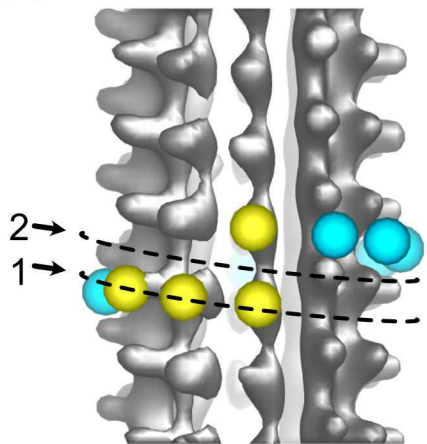
 $\rightarrow 90^\circ$ 
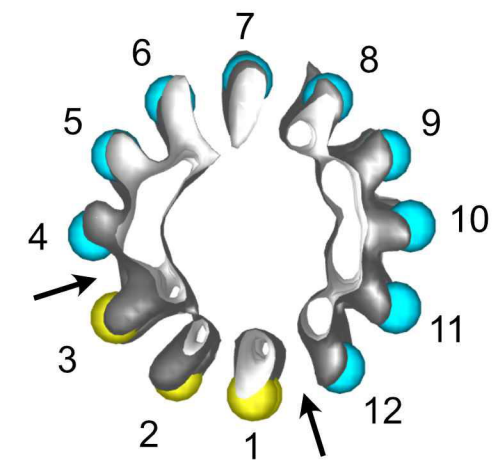**B**

12\_3

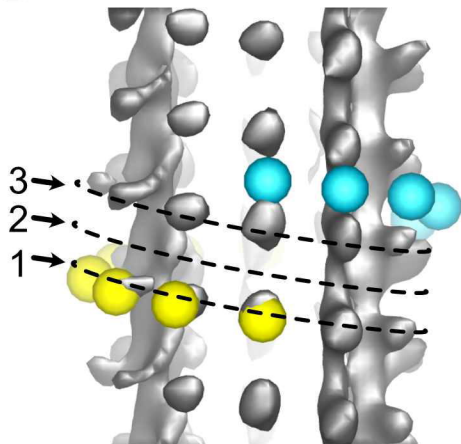
 $\rightarrow 90^\circ$ 
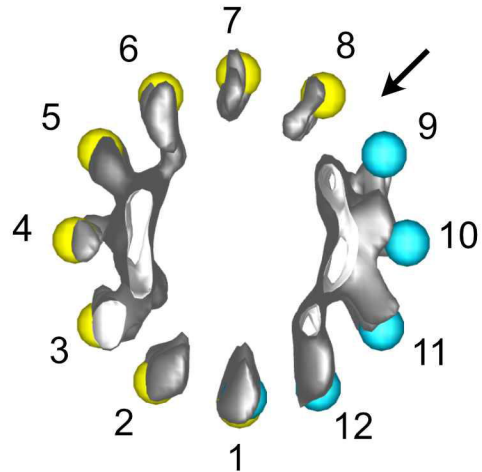**C**

13\_4

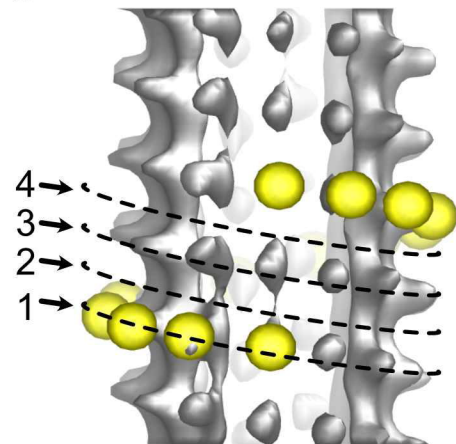
 $\rightarrow 90^\circ$ 
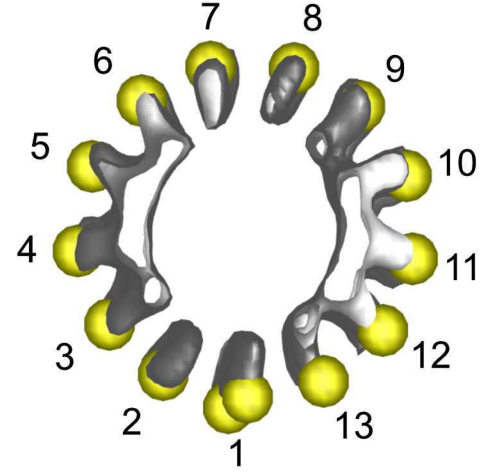**D**

14\_3

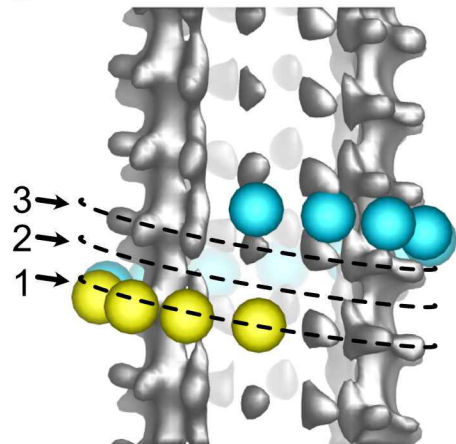
 $\rightarrow 90^\circ$ 
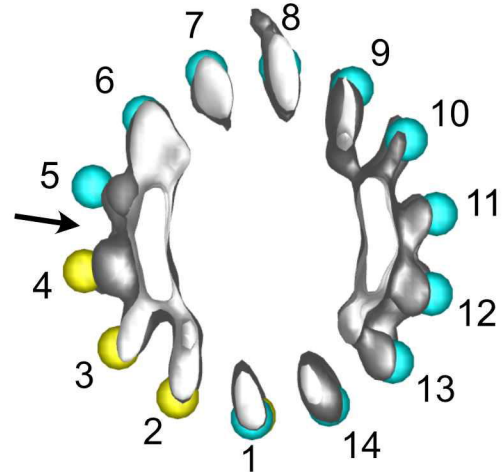



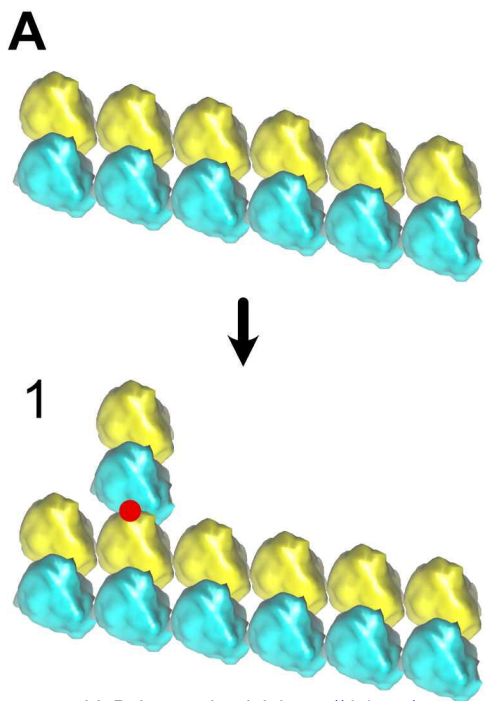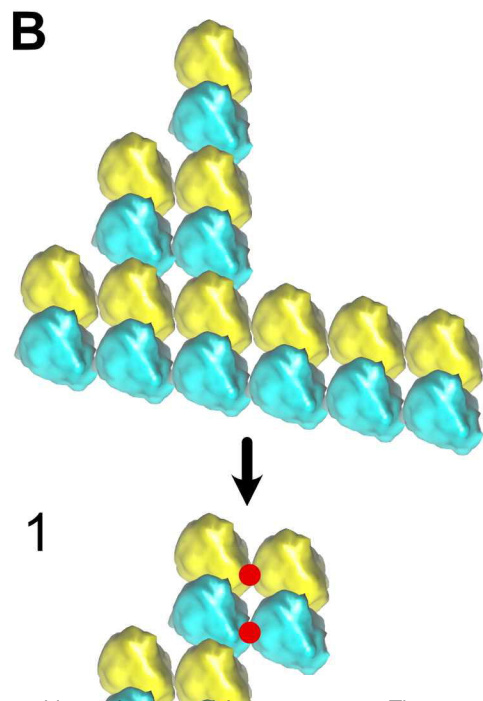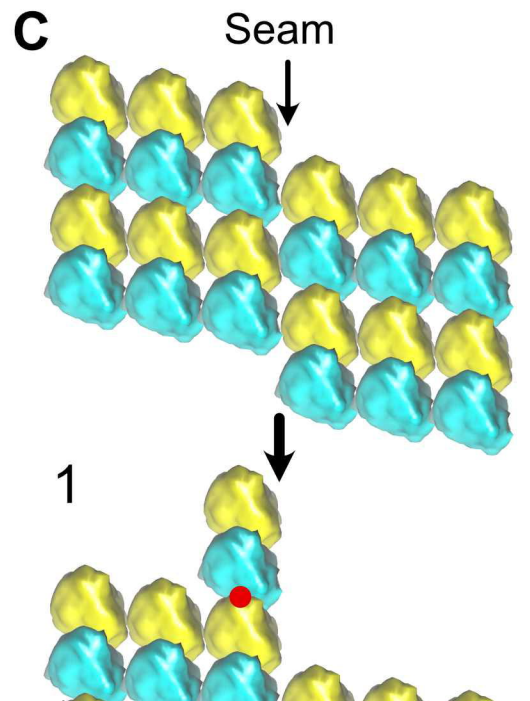

bioRxiv preprint doi: <https://doi.org/10.1101/2021.07.14.452321>; this version posted August 26, 2022. The copyright holder for this preprint (which was not certified by peer review) is the author/funder, who has granted bioRxiv a license to display the preprint in perpetuity. It is made available under aCC-BY-NC-ND 4.0 International license.

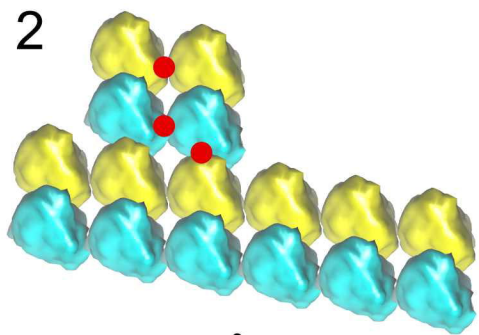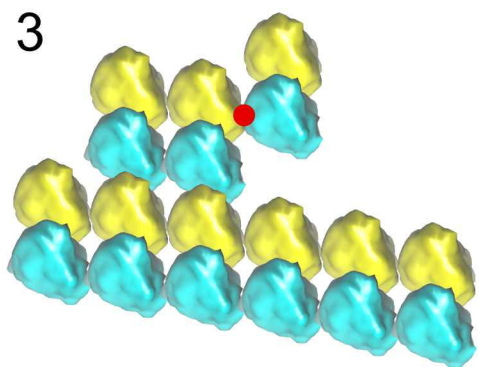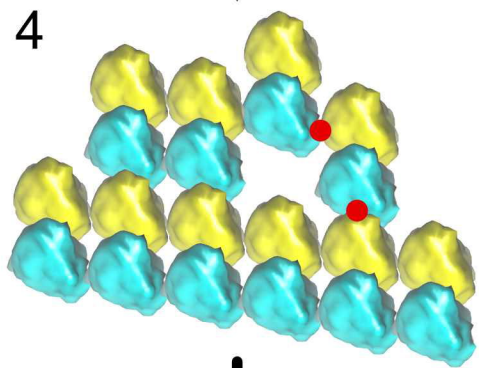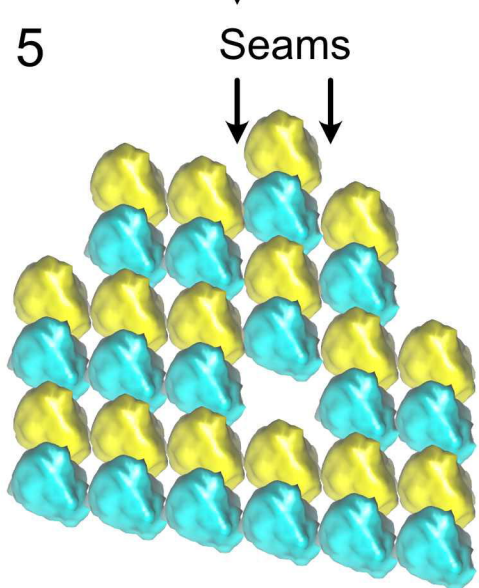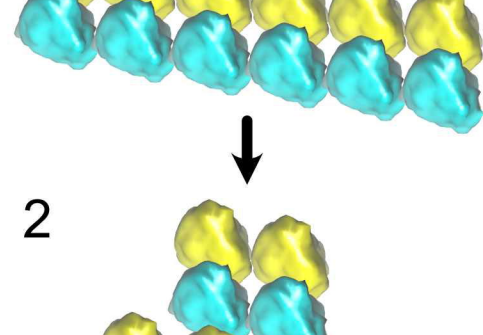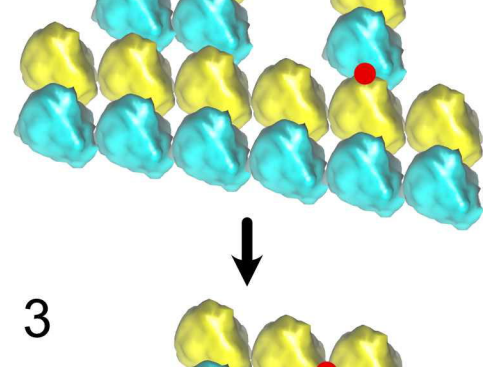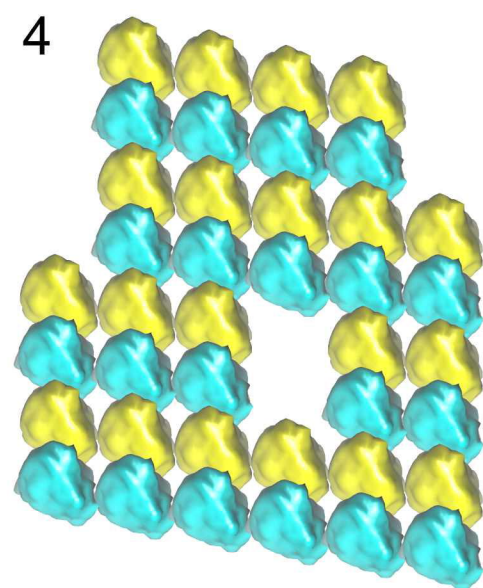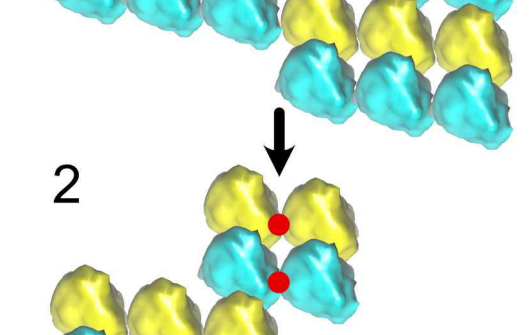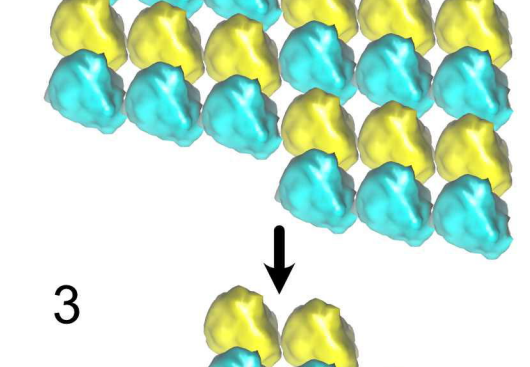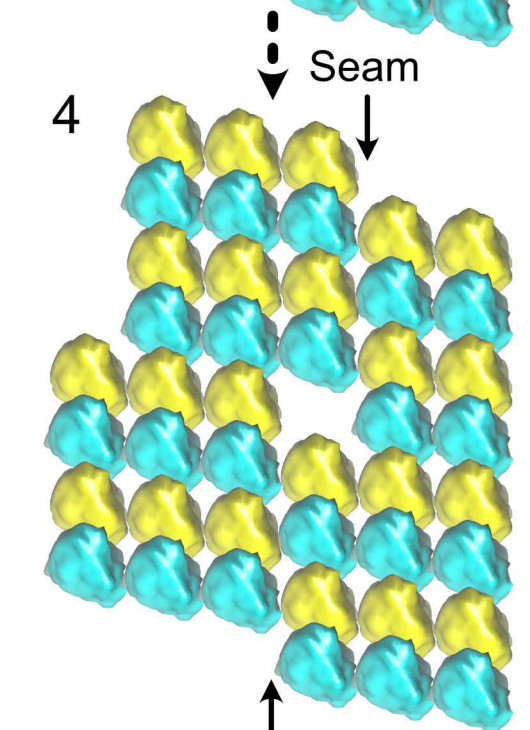

Source: https://www.biorxiv.org/content/10.1101/2021.07.14.452321v2.full.pdf
